# Supplementary material for: Cardiac Proteome Profiling in Ischemic and Dilated Cardiomyopathy Mouse Models
Source: Front Physiol. 2019 Jun 18;10:750. doi: 10.3389/fphys.2019.00750 (PMC6591471; doi:10.3389/fphys.2019.00750)
Supplement: Supplementary file 2 [file Table_2.xlsx]

## Sheet: sheet 1
Supplementary table S2. List of the 1638 proteins identified by LC-MS/MS.
Protein ID	Protein names	Gene names	Length	Average molecular weight(Da)	Coverage (%)	Unique peptides
O08810	116 kDa U5 small nuclear ribonucleoprotein component (Elongation factor Tu GTP-binding domain-containing protein 2) (U5 snRNP-specific protein, 116 kDa) (U5-116 kDa)	Eftud2 Snrp116	971	109361	5	2
Q6EDY6	F-actin-uncapping protein LRRC16A (CARMIL homolog) (Capping protein, Arp2/3 and myosin-I linker homolog 1) (Capping protein, Arp2/3 and myosin-I linker protein 1) (CARML1) (Leucine-rich repeat-containing protein 16A)	Lrrc16a Carmil Lrrc16	1374	151860	4	2
Q54AJ4	Oviduct-specific glycoprotein (Oviductal glycoprotein) (Oviductal glycoprotein 1)	Ovgp1 mCG_10746	721	78808	18	5
Q8BLW4	Putative uncharacterized protein	Col3a1	1464	138947	55	2
Q3V3P1	DNA topoisomerase (EC 5.99.1.2)	Top3a	954	107003	5	3
Q4G5Y4	Endothelial differentiation inhibitory protein D18	Brd3	726	79746	3	1
D3Z197	Histone-lysine N-methyltransferase NSD3	Whsc1l1	1397	156104	4	2
P10126	Elongation factor 1-alpha 1 (EF-1-alpha-1) (Elongation factor Tu) (EF-Tu) (Eukaryotic elongation factor 1 A-1) (eEF1A-1)	Eef1a1 Eef1a	462	50114	15	2
G3X908	Deoxycytidylate deaminase (dCMP deaminase, isoform CRA_a)	Dctd mCG_1853	184	20691	16	1
Q3U0V3	Putative uncharacterized protein	Ankrd13a	588	67159	8	2
E9QKM4	NACHT, LRR and PYD domains-containing protein 9A	Nlrp9a	949	109764	7	2
Q8BPH4	Putative uncharacterized protein	Taf7	315	35575	8	1
E9QQ26	Ectonucleotide pyrophosphatase/phosphodiesterase family member 1	Enpp1	369	41537	5	1
Q8BSC6	Putative uncharacterized protein (Fragment)	1700084E18Rik	243	24728	20	2
A0A0G2JFY5	Far upstream element-binding protein 1	Fubp1	654	68874	8	2
Q640L3-3	Cell cycle progression protein 1	Ccpg1	753	72554	8	2
Q9CXJ4	ATP-binding cassette sub-family B member 8, mitochondrial	Abcb8	717	78000	7	2
Q8K2I4	Beta-mannosidase (EC 3.2.1.25) (Lysosomal beta A mannosidase) (Mannanase) (Mannase)	Manba Bmn	879	100831	8	2
D3Z4V9	Glycine N-acyltransferase-like protein Keg1 (Fragment)	Keg1	228	26038	10	1
A0A0R4J060	Histone deacetylase complex subunit SAP130	Sap130	1056	111157	3	1
Q3U1B2	Putative uncharacterized protein	Elf1	575	62273	6	1
D3Z1V4	Phosphatidylethanolamine-binding protein 1	Pebp1	209	23035	17	1
Q69ZI2	MKIAA1483 protein (Fragment)	Zbtb2 Gm1103 mKIAA1483	492	54935	9	2
Q9JHI8-4	NADPH oxidase 4 (EC 1.6.3.-) (Kidney oxidase-1) (KOX-1) (Kidney superoxide-producing NADPH oxidase) (Renal NAD(P)H-oxidase) (Superoxide-generating NADPH oxidase 4)	Nox4 Renox	578	71244	4	2
B2RPZ1	Melanoma associated antigen (Mutated) 1-like 1	Mum1l1	590	66789	15	5
Q8CGH4	Bhlhe41 protein (Fragment)	Bhlhe41	193	21929	30	2
Q3TLR3	E3 ubiquitin-protein ligase TRIM32 (Tripartite motif protein 32, isoform CRA_b)	Trim32 mCG_51740	655	72057	7	2
Q3UHF7	Transcription factor HIVEP2 (Human immunodeficiency virus type I enhancer-binding protein 2 homolog) (Myc intron-binding protein 1) (MIBP-1)	Hivep2 Mibp1	2430	266702	1	2
E9PXX8	Protein Macc1	Macc1	851	96836	4	1
Q91VM4	Protein spinster homolog 2	Spns2	549	58196	10	2
E9Q2P1	Dermokine	Dmkn	524	52812	4	1
Q8K3Q4	Actinin alpha 2	Actn2	894	103933	56	1
Q148V5	Ring finger and CCCH-type zinc finger domains 2	Rc3h2 Mnab	1187	131247	3	1
Q9CWY3	N-lysine methyltransferase SETD6 (EC 2.1.1.-) (SET domain-containing protein 6)	Setd6	473	52960	10	2
Q3UEM4	Putative uncharacterized protein (Fragment)	Cyp2c44	457	52207	4	1
J3QMS2	MCG148436 (Protein 1700014D04Rik)	1700014D04Rik mCG_148436	983	108640	3	2
Q5SX79-2	Protein Shroom1	Shroom1	823	83360	3	1
B2RY15	Tln2 protein	Tln2	2542	271644	31	4
Q91YQ5	Dolichyl-diphosphooligosaccharide--protein glycosyltransferase subunit 1 (EC 2.4.99.18) (Dolichyl-diphosphooligosaccharide--protein glycosyltransferase 67 kDa subunit) (Ribophorin I) (RPN-I) (Ribophorin-1)	Rpn1	608	68528	10	4
G3UXB3	Protein Nkx1-1	Nkx1-1	402	40200	4	1
Q6P9L6	Kinesin-like protein KIF15 (Kinesin-like protein 2) (Kinesin-like protein 7)	Kif15 Klp2 Knsl7	1387	160119	4	3
O88509	DNA (cytosine-5)-methyltransferase 3B (Dnmt3b) (EC 2.1.1.37) (DNA methyltransferase MmuIIIB) (DNA MTase MmuIIIB) (M.MmuIIIB)	Dnmt3b	859	97228	2	1
A2AP18-3	1-phosphatidylinositol 4,5-bisphosphate phosphodiesterase eta-2 (EC 3.1.4.11) (Phosphoinositide phospholipase C-eta-2) (Phosphoinositide phospholipase C-like 4) (PLC-L4) (Phospholipase C-like protein 4) (Phospholipase C-eta-2) (PLC-eta2)	Plch2 Plcl4	1501	137734	6	3
D2EAC2	Zinc finger BED domain-containing protein 6 (Muscle growth regulator) (MGR)	Zbed6	980	109151	8	2
Q9ET54-6	Palladin	Palld Kiaa0992	1408	150553	3	2
Q9QZ83	Gamma actin-like protein	Actg1 Actl	393	43601	36	1
Q9QZ39	Alpha-N-acetylgalactosaminide alpha-2,6-sialyltransferase 1 (EC 2.4.99.3) (GalNAc alpha-2,6-sialyltransferase I) (ST6GalNAc I) (ST6GalNAcI) (Sialyltransferase 7A) (SIAT7-A)	St6galnac1 Siat7a	526	60734	6	2
Q3UT88	Putative uncharacterized protein	Rc3h1	1130	125454	8	3
A2AS45	Plakophilin-4	Pkp4	1163	128526	6	2
Q61464-4	Zinc finger protein 638 (Nuclear protein 220) (Zinc finger matrin-like protein)	Znf638 Np220 Zfml Zfp638	1960	214459	3	3
Q3UUL4	Zinc finger CCCH domain-containing protein 3	Zc3h3	950	103224	5	2
A2AL50	Alkyldihydroxyacetonephosphate synthase, peroxisomal	Agps	671	74343	9	3
I6L9D2	Actg2 protein	Actg2	202	22456	36	1
Q4KL35	PDZ domain-containing protein MAGIX	Magix Pdzx	324	34771	12	3
Q8BJS8	Mdm2-binding protein (mMTBP)	Mtbp	894	100314	8	3
A2A482	Protein Zmynd8	Zmynd8	1206	133559	4	3
E9PX56	RB1-inducible coiled-coil protein 1 (Fragment)	Rb1cc1	873	98808	4	2
O88329	Unconventional myosin-Ia (Brush border myosin I) (BBM-I) (BBMI) (Myosin I heavy chain) (MIHC)	Myo1a Bbmi Myhl	1043	118695	5	3
O08807	Peroxiredoxin-4 (EC 1.11.1.15) (Antioxidant enzyme AOE372) (Peroxiredoxin IV) (Prx-IV) (Thioredoxin peroxidase AO372) (Thioredoxin-dependent peroxide reductase A0372)	Prdx4	274	31053	23	2
Q8VIG0	Zinc finger CCHC domain-containing protein 14 (BDG-29)	Zcchc14 Kiaa0579	956	99835	6	1
Q3UKQ2	Putative uncharacterized protein	Cct8	548	59557	32	2
Q99N96	39S ribosomal protein L1, mitochondrial (L1mt) (MRP-L1)	Mrpl1	336	37597	10	1
Q8BFS9	Asparagine synthetase domain-containing protein 1	Asnsd1	627	69753	7	2
F8WJA7	AF4/FMR2 family member 3	Aff3	1228	133203	2	1
A0A087WPC0	Kin of IRRE-like protein 3	Kirrel3	579	63214	13	3
A2ANT9	Ankyrin repeat and SAM domain-containing protein 6	Anks6	815	86139	5	1
Q4VA41	Tubby-like protein	Tub mCG_2320	505	55362	14	3
Q9JJA9	General receptor for phosphoinositides 1-associated scaffold protein (GRP1-associated scaffold protein)	Grasp MNCb-4428	392	42337	12	1
Q6AXE3	ATP-binding cassette sub-family A member 3 (Abca3 protein)	Abca3	1449	163478	4	2
Q8R2S8	CD177 antigen (CD antigen CD177)	Cd177	817	87091	2	1
F8WIU7	Putative protein arginine N-methyltransferase 9	Prmt9 Prmt10	846	94206	7	2
P62932	F-box only protein 40	Fbxo40	710	79951	9	4
Q9D0B2	Putative uncharacterized protein	Hbb-y	147	16074	40	2
P70331	MyoD family inhibitor (Myogenic repressor I-mf)	Mdfi	251	26013	26	1
Q62415	Apoptosis-stimulating of p53 protein 1 (Protein phosphatase 1 regulatory subunit 13B)	Ppp1r13b Aspp1	1087	119170	6	3
A0A0N4SVT1	Probable ATP-dependent RNA helicase DDX47 (Fragment)	Ddx47	380	42347	6	1
Q9CXZ8	Putative uncharacterized protein (Fragment)	Riok3	234	27041	18	1
P35375	Prostaglandin E2 receptor EP1 subtype (PGE receptor EP1 subtype) (PGE2 receptor EP1 subtype) (Prostanoid EP1 receptor)	Ptger1 Ptgerep1	405	42966	20	2
Q571D3	MKIAA0478 protein (Fragment)	Zbtb40 mKIAA0478	1234	135730	3	2
Q66T02	Pleckstrin homology domain-containing family G member 5 (PH domain-containing family G member 5) (Synectin-binding RhoA exchange factor) (SYX)	Plekhg5 Kiaa0720 Syx	1073	118924	5	1
P10493	Nidogen-1 (NID-1) (Entactin)	Nid1 Ent	1245	136538	7	3
F6RG68	F-BAR domain only protein 2	Fcho2	803	88258	6	2
Q3TAM9	Putative uncharacterized protein	Bag3	577	61831	2	1
Q3UEN9	Serine--pyruvate aminotransferase (EC 2.6.1.44) (EC 2.6.1.51) (Alanine--glyoxylate aminotransferase)	Agxt	392	43520	8	1
P17182	Alpha-enolase (EC 4.2.1.11) (2-phospho-D-glycerate hydro-lyase) (Enolase 1) (Non-neural enolase) (NNE)	Eno1 Eno-1	434	47141	11	1
Q60987	Forkhead box protein G1 (FoxG1) (Brain factor 1) (BF-1) (BF1) (Forkhead-related protein FKHL1)	Foxg1 Fkhl1 Foxg1b Hfhbf1	481	51625	6	1
Q3ULW5	Ferritin	Ftl1 Ftl2	183	20768	50	1
A0A140LJ79	Synemin	Synm	674	76698	4	1
A4QPE8	B4galnt3 protein	B4galnt3	827	94805	6	3
Q91WK0	Leucine-rich repeat flightless-interacting protein 2 (LRR FLII-interacting protein 2)	Lrrfip2	415	47148	4	1
Q3TC32	Putative uncharacterized protein	Usp14	239	27857	17	2
F8WGF2	Nitric oxide synthase, brain	Nos1	1463	164314	6	3
Q91WB7	Ubiquitin domain-containing protein 1	Ubtd1	227	25985	10	1
Q8CHY7-2	Tetratricopeptide repeat protein 23 (TPR repeat protein 23)	Ttc23	488	30562	20	2
Q3URX8	Putative uncharacterized protein	Gemin4	1058	120180	3	1
Q8R2G6	Coiled-coil domain-containing protein 80 (Up-regulated in BRS-3 deficient mouse)	Ccdc80 Urb	949	107613	5	2
B1AXW6	Peroxiredoxin-1 (Fragment)	Prdx1	176	19483	28	2
Q3U410	Kelch-like protein 21	Klhl21	597	66547	4	1
B8XCJ6	Protein unc-80 homolog (UNC-80)	Unc80	3326	370563	4	4
A2AQB2	Protein Neb	Neb	3044	353167	9	2
Q3UIZ8	Myosin light chain kinase 3 (EC 2.7.11.18) (Cardiac-MyBP-C-associated Ca/CaM kinase) (Cardiac-MLCK)	Mylk3	795	86372	12	5
Q3UQS9	Putative uncharacterized protein	Myom2	1463	164785	23	1
B9EKB3	E3 ubiquitin-protein ligase (EC 6.3.2.-)	Wwp1	918	104708	8	1
Q8CIS0	Caspase recruitment domain-containing protein 11	Card11	1159	134040	5	2
Q8R5C9	Acacb protein (Fragment)	Acacb	810	91465	6	1
Q01149	Collagen alpha-2(I) chain (Alpha-2 type I collagen)	Col1a2 Cola2	1372	129557	56	4
A1L347	Heat shock 70 kDa protein 1-like (Heat shock protein 1-like) (Inducible heat shock protein 70)	Hspa1l mCG_15932	641	70637	34	1
E9Q7E1	Coiled-coil domain-containing protein 150	Ccdc150	580	66301	7	2
Q8BXJ8	Zinc finger protein 385B (Zinc finger protein 533)	Znf385b Zfp385b Zfp533 Znf533	482	51356	14	3
Q7TPS0-2	Ribosomal protein S6 kinase alpha-6 (S6K-alpha-6) (EC 2.7.11.1)	Rps6ka6	764	81253	4	3
Q8VHQ2	Suppressor of cytokine signaling 7 (SOCS-7)	Socs7 Cish7 Nap4	579	62784	9	2
S4R2U0	Tropomyosin alpha-1 chain	Tpm1	157	17911	43	1
Q8VEG0	Coiled-coil domain-containing protein 71	Ccdc71	433	46010	16	2
Q3V0K9	Plastin-1	Pls1	630	70408	8	1
E9PVV8	Muscle, skeletal receptor tyrosine-protein kinase	Musk	893	99684	3	1
A6H6E9	Tetratricopeptide repeat protein 23-like	Ttc23l	458	51532	6	2
P18111	Homeobox protein CDX-1 (Caudal-type homeobox protein 1)	Cdx1 Cdx-1	268	28436	19	2
E6Y2W6	Coiled-coil domain-containing protein 136 (Taraco alpha)	Ccdc136	1002	116806	4	1
E9PW78	RING finger protein 207 (Fragment)	Rnf207	515	57536	11	2
D3YW43	Heat shock cognate 71 kDa protein	Hspa8	158	17443	45	2
Q6P9R4-2	Rho guanine nucleotide exchange factor 18	Arhgef18 Kiaa0521	1021	111026	7	3
P10518	Delta-aminolevulinic acid dehydratase (ALADH) (EC 4.2.1.24) (Porphobilinogen synthase)	Alad Lv	330	36024	19	3
Q64323	N-acetylglucosaminyl-phosphatidylinositol biosynthetic protein (GlcNAc-PI synthesis protein) (Phosphatidylinositol-glycan biosynthesis class A protein) (PIG-A)	Piga	485	54469	6	1
Q9D4X9	RIKEN cDNA 4930542C12	4930542C12Rik mCG_15225	193	20083	16	4
Q80U27	Kinesin-like protein (Fragment)	Kif3b mKIAA0359	757	86545	11	4
B2RU65	Deubiquitinating enzyme 1	Usp17la Dub1	526	59063	9	2
Q6IQX7	Chondroitin sulfate synthase 2 (EC 2.4.1.175) (EC 2.4.1.226) (Chondroitin glucuronyltransferase 2) (Chondroitin-polymerizing factor) (ChPF) (Glucuronosyl-N-acetylgalactosaminyl-proteoglycan 4-beta-N-acetylgalactosaminyltransferase II) (N-acetylgalactosaminyl-proteoglycan 3-beta-glucuronosyltransferase II) (N-acetylgalactosaminyltransferase 2)	Chpf Css2 D1Bwg1363e	774	85534	5	2
E9PYI4	Protein Mroh8	Mroh8 4922505G16Rik	1049	119511	9	3
Q3UIJ3	Putative uncharacterized protein	Actc1	377	42118	37	2
E9Q9B7	Protein Kidins220	Kidins220	1793	199183	1	1
A0A140LJC2	Protein Gm1043	Gm1043	1431	157157	6	3
Q8C5W0-2	Calmin (Calponin-like transmembrane domain protein)	Clmn	1052	102566	6	2
B2RVL1	Potassium channel, subfamily K, member 15 (Protein Kcnk15)	Kcnk15	343	38381	5	1
Q80W65	Proprotein convertase subtilisin/kexin type 9 (EC 3.4.21.-) (Neural apoptosis-regulated convertase 1) (NARC-1) (Proprotein convertase 9) (PC9) (Subtilisin/kexin-like protease PC9)	Pcsk9 Narc1	694	74823	7	2
F7C7C4	Sodium/potassium-transporting ATPase subunit beta-1-interacting protein 2	Nkain2	185	18563	15	2
B2RUJ7	Xanthine dehydrogenase	Xdh	1335	146560	6	3
Q3UQD5	Putative uncharacterized protein (Fragment)	Ncoa6	1511	159527	2	2
Q8BKC8-2	Phosphatidylinositol 4-kinase beta (PI4K-beta) (PI4Kbeta) (PtdIns 4-kinase beta) (EC 2.7.1.67)	Pi4kb Pik4cb	816	89944	6	2
Q0VBU4	Coiled-coil domain containing 47 (MCG3218, isoform CRA_a)	Ccdc47 mCG_3218	483	55844	11	4
O54863	Testis-specific serine/threonine-protein kinase 2 (TSK-2) (TSK2) (TSSK-2) (Testis-specific kinase 2) (EC 2.7.11.1) (Serine/threonine-protein kinase 22B)	Tssk2 Stk22b	358	41022	11	1
Q3U3C9-2	Genetic suppressor element 1	Gse1 Kiaa0182	1213	137389	5	4
Q3TCR9	Putative uncharacterized protein	Zyx	564	60547	11	2
Q9D881	Cytochrome c oxidase subunit 5B, mitochondrial (Cytochrome c oxidase, subunit Vb) (MCG17741, isoform CRA_d) (MCG23026) (Protein Gm11273)	Cox5b Gm11273 mCG_17741 mCG_23026	129	13847	71	4
E9Q2I3	Protein phosphatase 1M	Ppm1m	462	51226	11	3
B2RWX5	Centrosomal protein 250	Cep250	2414	276848	11	2
G3X8X0	DEAH (Asp-Glu-Ala-His) box polypeptide 16, isoform CRA_a (Protein Dhx16)	Dhx16 mCG_141148	1044	119072	13	2
B2RWS7	Zinc finger protein 609	Zfp609	1363	145892	5	3
J7I1C3	Rif1	Rif1	2418	265898	4	5
O54946	DnaJ homolog subfamily B member 6 (Heat shock protein J2) (HSJ-2) (MRJ) (mDj4)	Dnajb6 Hsj2 Mrj	365	39807	11	2
Q3TTV4	Putative uncharacterized protein (Fragment)	Pkd1	681	75591	9	3
Q60596	DNA repair protein XRCC1 (X-ray repair cross-complementing protein 1)	Xrcc1 Xrcc-1	631	68971	8	1
J3QN31	Adenylosuccinate synthetase isozyme 1 (AMPSase 1) (AdSS 1) (EC 6.3.4.4) (Adenylosuccinate synthetase, basic isozyme) (Adenylosuccinate synthetase, muscle isozyme) (IMP--aspartate ligase 1)	Adssl1 Adss1	480	52780	18	3
Q8CHT1-2	Ephexin-1 (Eph-interacting exchange protein) (Neuronal guanine nucleotide exchange factor)	Ngef	710	71416	3	1
Q6VH22	Intraflagellar transport protein 172 homolog (Protein wimple)	Ift172 Kiaa1179 Wim	1749	197547	2	1
Q69Z89-2	Ras-associating and dilute domain-containing protein	Radil Kiaa1849	1099	114933	7	3
Q8BSE0	Regulator of microtubule dynamics protein 2 (RMD-2) (mRMD-2) (Protein FAM82A1)	Rmdn2 Fam82a Fam82a1	410	47016	7	1
Q3U024	Putative uncharacterized protein (Fragment)	Txndc11	890	99845	10	3
P20108	Thioredoxin-dependent peroxide reductase, mitochondrial (EC 1.11.1.15) (Antioxidant protein 1) (AOP-1) (PRX III) (Perioredoxin-3) (Protein MER5)	Prdx3 Aop1 Mer5	257	28127	9	1
Q7TNF8-2	Peripheral-type benzodiazepine receptor-associated protein 1 (PRAX-1) (Peripheral benzodiazepine receptor-interacting protein) (PBR-IP) (RIMS-binding protein 1) (RIM-BP1)	Bzrap1 Kiaa0612 Rbp1	1846	169899	3	2
Q3TQD9	Putative uncharacterized protein (Fragment)	Sardh	901	99756	7	3
G3X8T2	RIKEN cDNA 5830416A07, isoform CRA_c (Zinc finger CCCH domain-containing protein 18)	Zc3h18 5830416A07Rik mCG_1040504	972	108231	6	3
G3UZ36	Interferon-inducible protein AIM2 (Fragment)	Aim2	94	10833	41	1
P58022-2	Lysyl oxidase homolog 2 (EC 1.4.3.13) (Lysyl oxidase-like protein 2)	Loxl2	776	81168	3	2
Q91VT9	Pvrl2 protein	Pvrl2	467	50756	6	1
P12960	Contactin-1 (Neural cell surface protein F3)	Cntn1	1020	113388	7	3
Q8R5M6	CaV2.1	Cacna1a	2365	267594	8	10
P17183	Gamma-enolase (EC 4.2.1.11) (2-phospho-D-glycerate hydro-lyase) (Enolase 2) (Neural enolase) (Neuron-specific enolase) (NSE)	Eno2 Eno-2	434	47297	17	2
F6Q1W8	Cortactin-binding protein 2 (Fragment)	Cttnbp2	1139	123964	6	2
A0A140LHM6	Protein FAM181B	Fam181b	384	39148	10	1
B7ZP20	Ankyrin repeat and FYVE domain containing 1	Ankfy1	1169	128636	3	1
Q5M9M5	60S ribosomal protein L23a (MCG10806) (Ribosomal protein L23a)	Rpl23a mCG_10806	156	17695	18	1
Q8BHW6	Spermatogenesis-associated protein 21	Spata21	681	75541	4	1
E9PUP3	Anion exchange protein	Slc4a9	929	102476	4	1
Q6NVF4	DNA helicase B (EC 3.6.4.12)	Helb	1074	121471	6	3
Q8BJC1	Putative uncharacterized protein (Fragment)	Sema4d	799	88814	8	2
A2AGQ8	MAP kinase-activating death domain protein	Madd	1562	172804	5	2
A7VL18	Gamma-aminobutyraldehyde dehydrogenase	Aldh9a1 ABALDH	494	53533	11	2
Q3U8K7	Histone-lysine N-methyltransferase KMT5B (EC 2.1.1.43) (Lysine-specific methyltransferase 5B) (Suppressor of variegation 4-20 homolog 1) (Su(var)4-20 homolog 1) (Suv4-20h1)	Kmt5b Suv420h1	883	98580	6	2
Q3UEB3	Poly(U)-binding-splicing factor PUF60 (60 kDa poly(U)-binding-splicing factor)	Puf60	564	60249	7	2
Q3UGP2	Putative uncharacterized protein	Fbxo18	1042	118316	5	2
E9Q507	GON-4-like protein	Gon4l	2242	246704	4	5
P43276	Histone H1.5 (H1 VAR.5) (H1b)	Hist1h1b H1f5	223	22576	19	2
A0A0J9YUM0	Translation factor Guf1, mitochondrial	Guf1	302	33281	11	1
J3QK46	Protein Tmem200c	Tmem200c	637	66184	8	3
A0A0R4J1G7	Echinoderm microtubule-associated protein-like 4	Eml4	919	102304	11	3
A1L340	MCG56960 (Retinitis pigmentosa 1 homolog (Human)-like 1) (Retinitis pigmentosa 1-like 1 protein)	Rp1l1 Rp1hl1 mCG_56960	1859	199684	2	2
Q3THG9	Alanyl-tRNA editing protein Aarsd1 (Alanyl-tRNA deacylase alaX) (AlaX) (AlaXp-II) (Alanyl-tRNA synthetase domain-containing protein 1)	Aarsd1 Alax	412	44971	9	1
A2A8L1	Chromodomain-helicase-DNA-binding protein 5 (CHD-5) (EC 3.6.4.12) (ATP-dependent helicase CHD5)	Chd5 Kiaa0444	1946	222513	7	3
Q9D4H7	LON peptidase N-terminal domain and RING finger protein 3 (RING finger protein 127)	Lonrf3 Rnf127	753	83656	7	3
Q99N42	Thymidine phosphorylase (TP) (EC 2.4.2.4) (TdRPase)	Tymp Ecgf1	471	49336	8	2
Q8R0K4	Coiled-coil domain-containing protein 137	Ccdc137	290	32918	10	2
Q3UT06	Putative uncharacterized protein	Enox2 Cova1	598	68271	12	3
Q5STE3	Follistatin-related protein 4 (Follistatin-like protein 4) (m-D/Bsp120I 1-1)	Fstl4 Kiaa1061	841	92579	6	2
Q3UHD9-2	Arf-GAP with GTPase, ANK repeat and PH domain-containing protein 2 (AGAP-2) (Centaurin-gamma-1) (Cnt-g1) (Phosphatidylinositol 3-kinase enhancer) (PIKE)	Agap2 Centg1 Kiaa0167	1186	122102	10	4
Q9CWL2	Zinc finger protein castor homolog 1 (Castor-related protein)	Casz1 Cst D4Ertd432e Kiaa3026	1761	191187	4	3
Q8BIV1	Protein Zfp719	Zfp719	735	83599	3	1
F6QQP6	Disabled homolog 2-interacting protein (Fragment)	Dab2ip	713	77664	10	1
Q8C0S4-2	Tetratricopeptide repeat protein 21A (TPR repeat protein 21A) (Tetratricopeptide repeat-containing hedgehog modulator 2)	Ttc21a Thm2	1314	139023	2	1
Q8CGV9	Teashirt homolog 3 (Zinc finger protein 537)	Tshz3 Kiaa1474 Tsh3 Zfp537 Znf537	1081	118626	8	2
D3YTZ9	Protein RIC-3	Ric3	366	40196	12	3
B2RUR3	ATP-binding cassette, sub-family B (MDR/TAP), member 1B (MCG1177) (Multidrug resistance protein 1B)	Abcb1b mCG_1177	1276	140993	9	2
F8VQG7	Protein N4bp2	N4bp2	1678	184699	2	1
B9EKA0	Diffuse panbronchiolitis critical region 1 (Human)	Dpcr1	500	54340	7	2
Q3UTL6	Putative uncharacterized protein (Fragment)	Mib1	368	40601	8	2
E9QLG3	MAX gene-associated protein	Mga	3042	333137	9	3
Q61107	Guanylate-binding protein 4 (EC 3.6.5.-) (GTP-binding protein 3) (GBP-3) (GTP-binding protein 4) (GBP-4) (Guanine nucleotide-binding protein 4) (Guanylate-binding protein 3)	Gbp4 Gbp3	620	70801	13	2
Q80YD1	ATP-dependent RNA helicase SUPV3L1, mitochondrial (EC 3.6.4.13) (Suppressor of var1 3-like protein 1) (SUV3-like protein 1)	Supv3l1 Suv3l1	779	87005	4	2
P70232-2	Neural cell adhesion molecule L1-like protein (Cell adhesion molecule with homology to L1CAM) (Chl1-like protein) (Close homolog of L1) [Cleaved into: Processed neural cell adhesion molecule L1-like protein]	Chl1 Call	1209	129001	14	2
A0A0R4J0H3	Retinol-binding protein 3	Rbp3	1234	134481	4	2
F6UD05	A disintegrin and metalloproteinase with thrombospondin motifs 7	Adamts7	1556	171575	3	2
Q8VCG3	WD repeat-containing protein 74	Wdr74	384	42636	13	1
Q9ESU7	Amino acid transporter	Slc1a5 mCG_2082	555	58423	16	3
Q91W18-3	Tudor domain-containing protein 3	Tdrd3	743	81929	6	2
Q9ER65-2	Calsyntenin-2 (Alcadein-gamma) (Alc-gamma)	Clstn2 Cs2 Cstn2 Kiaa4134	966	107347	3	1
Q60597-3	2-oxoglutarate dehydrogenase, mitochondrial (EC 1.2.4.2) (2-oxoglutarate dehydrogenase complex component E1) (OGDC-E1) (Alpha-ketoglutarate dehydrogenase)	Ogdh Kiaa4192	1023	118179	34	1
C7G3P2	MKIAA0536 protein (Fragment)	Prpf4b mKIAA0536	1011	117436	2	1
Q8VCD0	Kinase insert domain protein receptor (Vascular endothelial growth factor receptor 2)	Kdr mCG_7209	1345	150461	4	2
G3X972	Protein Sec24c (SEC24 related gene family, member C (S. cerevisiae), isoform CRA_a)	Sec24c mCG_121333	1096	118581	3	2
Q8R1W8	Interphotoreceptor matrix proteoglycan 1 (Interphotoreceptor matrix proteoglycan of 150 kDa) (IPM-150) (Sialoprotein associated with cones and rods)	Impg1 Spacr	798	89474	12	3
Q80VH0	B-cell scaffold protein with ankyrin repeats (Protein AVIEF)	Bank1	783	89406	6	2
Q3TNX8	A disintegrin and metalloproteinase with thrombospondin motifs 4	Adamts4	845	91239	3	1
Q08EK5	Keratin 77 (Keratin, type II cytoskeletal 1b)	Krt77 mCG_1050946	572	61359	18	4
Q5DTJ5	MKIAA4177 protein (Fragment)	Pex6 mKIAA4177	796	84253	9	3
E9Q993	Aryl hydrocarbon receptor nuclear translocator-like protein 2	Arntl2	569	63259	5	1
Q6GYP7-3	Ral GTPase-activating protein subunit alpha-1 (GAP-related-interacting partner to E12) (GRIPE) (GTPase-activating RapGAP domain-like 1) (Tuberin-like protein 1) (p240)	Ralgapa1 Garnl1 Kiaa0884 Tulip1	2035	83311	4	1
Q9JIY5	Serine protease HTRA2, mitochondrial (EC 3.4.21.108) (High temperature requirement protein A2) (HtrA2) (Omi stress-regulated endoprotease) (Serine protease 25) (Serine proteinase OMI)	Htra2 Omi Prss25	458	49348	15	2
C6EQH3	Succinyl-CoA ligase subunit beta (EC 6.2.1.-)	Suclg2	414	44782	17	4
Q6ZQ93	Ubiquitin carboxyl-terminal hydrolase 34 (EC 3.4.19.12) (Deubiquitinating enzyme 34) (Ubiquitin thioesterase 34) (Ubiquitin-specific-processing protease 34)	Usp34 Kiaa0570 Murr2	3582	408216	2	2
Q80XH7	DNA polymerase (EC 2.7.7.7)	Pole	2283	262113	6	7
Q3UHT7	Putative uncharacterized protein	Erc2 D14Ertd171e	977	113057	9	4
Q3U146	Putative uncharacterized protein	Sipa1	1038	112214	2	1
Q69ZS8	Kazrin	Kazn Kaz Kiaa1026	779	86717	4	1
A0PJJ1	Phf3 protein (Fragment)	Phf3	855	95101	2	1
B1AV01	E3 ubiquitin-protein ligase Midline-1	Mid1	642	71748	9	3
E9QPX1	Collagen alpha-1(XVIII) chain	Col18a1	1774	182296	3	3
P08228	Superoxide dismutase [Cu-Zn] (EC 1.15.1.1)	Sod1	154	15943	32	2
Q3UP01	Putative uncharacterized protein (Fragment)	Lrch1	754	83138	7	2
Q3TP88	Putative uncharacterized protein (Fragment)	Col1a2	959	91859	60	1
V9PC04	Toll-like receptor 4 (Fragment)	Tlr4 TLR4	748	85619	3	2
P70365-3	Nuclear receptor coactivator 1 (NCoA-1) (EC 2.3.1.48) (Nuclear receptor coactivator protein 1) (mNRC-1) (Steroid receptor coactivator 1) (SRC-1)	Ncoa1 Src1	1447	153943	7	7
Q9CS84-3	Neurexin-1 (Neurexin I-alpha) (Neurexin-1-alpha)	Nrxn1 Kiaa0578	1514	164595	2	2
Q8BJR1	ETS translocation variant 5	Etv5	528	59492	5	1
A8Y5T6	Probable proline--tRNA ligase, mitochondrial	Pars2	511	57736	11	3
Q3U254	Putative uncharacterized protein	Emilin1	1017	107584	4	1
O08908	Phosphatidylinositol 3-kinase regulatory subunit beta (PI3-kinase regulatory subunit beta) (PI3K regulatory subunit beta) (PtdIns-3-kinase regulatory subunit beta) (Phosphatidylinositol 3-kinase 85 kDa regulatory subunit beta) (PI3-kinase subunit p85-beta) (PtdIns-3-kinase regulatory subunit p85-beta)	Pik3r2	722	81266	10	4
S4R2S8	Ankyrin-3	Ank3	1985	216908	17	2
Q8VI59	Pecanex-like protein 3 (Pecanex homolog protein 3)	Pcnx3 Pcnxl3	2028	221571	5	2
Q3TSS1	Putative uncharacterized protein (Fragment)	Mib1	264	28811	12	2
Q6P9R1	ATP-dependent RNA helicase DDX51 (EC 3.6.4.13) (DEAD box protein 51)	Ddx51	639	70368	9	2
C3VLD3	Large conductance Ca2+-activated potassium channel DEC variant 1	Kcnma1	1195	134534	4	2
Q7TN08	Dapper homolog 2 (mDpr2) (Dapper antagonist of catenin 2)	Dact2 Dpr2 Frd2	757	81668	8	3
P01027	Complement C3 (HSE-MSF) [Cleaved into: Complement C3 beta chain; C3-beta-c (C3bc); Complement C3 alpha chain; C3a anaphylatoxin; Acylation stimulating protein (ASP) (C3adesArg); Complement C3b alpha' chain; Complement C3c alpha' chain fragment 1; Complement C3dg fragment; Complement C3g fragment; Complement C3d fragment; Complement C3f fragment; Complement C3c alpha' chain fragment 2]	C3	1663	186483	4	3
Q05CJ7	Ctr9 protein (Fragment)	Ctr9	936	107678	3	2
Q3TIQ3	Putative uncharacterized protein (Fragment)	Pitpna	350	40215	6	2
E9QN14	SLIT-ROBO Rho GTPase-activating protein 3	Srgap3	1075	121724	6	3
Q7TQC0	DNA polymerase Q		2587	285864	4	5
Q8CCP0-3	Nuclear export mediator factor Nemf (Serologically defined colon cancer antigen 1 homolog)	Nemf Sdccag1	1064	73149	10	4
B9EKJ4	Yeats2 protein	Yeats2	1350	142583	8	3
Q6KAU9	MFLJ00002 protein (Fragment)	mFLJ00002	1486	161729	5	1
A0A087WPP1	Voltage-dependent L-type calcium channel subunit alpha-1C	Cacna1c	2167	243387	4	3
Q3UPG8	Putative uncharacterized protein (Fragment)	Cacna1s	1810	206064	6	7
A2AU91	Tumor suppressor p53-binding protein 1	Trp53bp1	1969	212733	3	3
Q7TR98	Olfactory receptor	Olfr1006 mCG_54086	312	34889	7	2
Q8C147	Dedicator of cytokinesis protein 8	Dock8	2100	238976	5	5
E9PV24	Fibrinogen alpha chain [Cleaved into: Fibrinopeptide A; Fibrinogen alpha chain]	Fga	789	87429	24	3
Q91XI2	Catalase (EC 1.11.1.6)	Cat Cas1	527	59738	5	1
Q923W1	Trimethylguanosine synthase (EC 2.1.1.-) (Nuclear receptor coactivator 6-interacting protein) (PRIP-interacting protein with methyltransferase motif) (PIMT) (PIPMT)	Tgs1 Ncoa6ip Pimt	853	96790	5	2
Q80YT3	Gene model 443, (NCBI) (Protein Cct8l1)	Cct8l1 Gm443	562	60719	7	2
A0A0R4J083	Long-chain-specific acyl-CoA dehydrogenase, mitochondrial	Acadl	430	47897	35	3
Q8R1F1	Niban-like protein 1 (Protein FAM129B)	Fam129b	749	84819	6	2
Q5DTN9	MKIAA4089 protein (Fragment)	Adgrb1 Bai1 mKIAA4089	1251	137763	3	2
C1KG51	Truncated profilaggrin/filaggrin flaky tail mutant form	Flg	1920	205486	5	3
Q9QXM1-3	Junction-mediating and -regulatory protein	Jmy	983	108705	5	2
Q9CR68	Cytochrome b-c1 complex subunit Rieske, mitochondrial (EC 1.10.2.2) (Complex III subunit 5) (Cytochrome b-c1 complex subunit 5) (Rieske iron-sulfur protein) (RISP) (Ubiquinol-cytochrome c reductase iron-sulfur subunit) [Cleaved into: Cytochrome b-c1 complex subunit 11 (Complex III subunit IX) (Ubiquinol-cytochrome c reductase 8 kDa protein)]	Uqcrfs1	274	29368	22	3
L7N451	Interferon-induced very large GTPase 1	Gvin1	2427	280781	2	2
Q80XH3	Tle6 protein (Transducin-like enhancer of split 6, homolog of Drosophila E(Spl), isoform CRA_b)	Tle6 mCG_12101	508	56766	5	1
Q4QRL3	Coiled-coil domain-containing protein 88B (Hook-related protein 3) (HkRP3)	Ccdc88b Ccdc88	1481	166608	7	5
F6SFN2	Serine/threonine-protein kinase 19 (Fragment)	Stk19	107	12012	20	1
Q8CGF7-3	Transcription elongation regulator 1 (Formin-binding protein 28) (FBP 28) (TATA box-binding protein-associated factor 2S) (Transcription factor CA150) (p144)	Tcerg1 Taf2s	1100	116054	2	1
A2AST1	Coiled-coil protein associated with myosin II and DISC1 (MCG142258, isoform CRA_a) (Protein Ccdc141)	Ccdc141 CAMDI mCG_142258	1451	164904	4	1
Q6PF93	Phosphatidylinositol 3-kinase catalytic subunit type 3 (PI3-kinase type 3) (PI3K type 3) (PtdIns-3-kinase type 3) (EC 2.7.1.137) (Phosphoinositide-3-kinase class 3)	Pik3c3 Vps34	887	101487	5	1
O35134	DNA-directed RNA polymerase I subunit RPA1 (RNA polymerase I subunit A1) (EC 2.7.7.6) (DNA-directed RNA polymerase I largest subunit) (DNA-directed RNA polymerase I subunit A) (RNA polymerase I 194 kDa subunit) (RPA194)	Polr1a Rpa1 Rpo1-4	1717	194109	9	4
A2A6Q5-2	Cell division cycle protein 27 homolog	Cdc27	825	92405	4	2
A0A0N4SUH4	Pumilio homolog 3	Pum3	648	72931	10	3
E9Q8S5	Microtubule-associated serine/threonine-protein kinase 3	Mast3	1305	142549	3	2
Q8VCM4	Lipoyltransferase 1, mitochondrial (EC 2.3.1.-) (Lipoate biosynthesis protein) (Lipoate-protein ligase) (Lipoyl ligase)	Lipt1	373	42146	8	1
A0A0A0MQ76	Nucleolar protein 58	Nop58	444	50064	8	2
P51175	Protoporphyrinogen oxidase (PPO) (EC 1.3.3.4)	Ppox	477	50871	14	2
E9PV14	Band 4.1-like protein 1 (Fragment)	Epb41l1 Epb4.1l1	1064	117172	7	3
E0CXS4	Protein Grip2	Grip2	1001	107648	7	3
Q8VDM1	Zinc finger CCCH-type with G patch domain-containing protein	Zgpat Kiaa1847	511	56411	13	2
Q3TWW0	1,25-dihydroxyvitamin D(3) 24-hydroxylase, mitochondrial (Cytochrome P450, family 24, subfamily a, polypeptide 1)	Cyp24a1 mCG_6551	514	59453	11	2
A0A0A6YY09	Protein Pcdh9	Pcdh9	1195	131721	2	1
Q9EQZ6-3	Rap guanine nucleotide exchange factor 4 (Exchange factor directly activated by cAMP 2) (Exchange protein directly activated by cAMP 2) (EPAC 2) (cAMP-dependent Rap1 guanine-nucleotide exchange factor) (cAMP-regulated guanine nucleotide exchange factor II) (cAMP-GEFII)	Rapgef4 Cgef2 Epac2	1011	113489	10	3
Q5SYL3	Protein KIAA0100	Kiaa0100	2234	254467	5	5
Q8CCJ3-1	E3 UFM1-protein ligase 1 (EC 6.3.2.-)	Ufl1 Kiaa0776	793	80220	12	2
G3X912	SprT-like domain-containing protein Spartan (Protein with SprT-like domain at the N terminus) (Spartan)	Sprtn Gm505	497	55317	9	2
F8VPT3	Protein Lct	Lct	1931	217800	5	5
Q8K2E5	Budding uninhibited by benzimidazoles 1 homolog, beta (S. cerevisiae)	Bub1b	1052	118431	4	1
Q9CUD6	Putative uncharacterized protein (Fragment)	Map10 4933403G14Rik	889	95948	3	1
Q8BYN3	Inositol-tetrakisphosphate 1-kinase (EC 2.7.1.134) (Inositol 1,3,4-trisphosphate 5/6-kinase) (Inositol-triphosphate 5/6-kinase) (Ins(1,3,4)P(3) 5/6-kinase) (EC 2.7.1.159)	Itpk1	419	46145	11	2
D3Z2Z1	CAP-Gly domain-containing linker protein 1	Clip1	1426	160010	3	1
Q3U6Z1	Putative uncharacterized protein	Lcp1	627	70172	5	1
Q8CGH7	Ap3d1 protein (Fragment)	Ap3d1	745	84349	3	1
Q8BTY8	Sec1 family domain-containing protein 2 (Neuronal Sec1) (Syntaxin-binding protein 1-like 1)	Scfd2 Stxbp1l1	684	74751	9	2
H3BL37	Treacle protein	Tcof1	1356	138556	11	3
A2AJY2	Collagen alpha-1(XV) chain	Col15a1	1345	138292	3	2
Q9DA96	Putative uncharacterized protein	Mroh4 1700016M24Rik	983	112746	9	3
Q8K1N2	Pleckstrin homology-like domain family B member 2 (Protein LL5-beta)	Phldb2 Ll5b	1249	141485	3	2
B2BH30	Metabotropic glutamate receptor 5 (Metabotropic glutamate receptor subtype 5b)	Grm5	1203	131865	2	1
A2A4A6	Phosphoinositide phospholipase C (EC 3.1.4.11)	Plcg1 mCG_15356	1290	148534	5	2
E9QAS3	Tyrosine-protein phosphatase non-receptor type 22	Ptpn22	715	80197	5	1
Q8R3D4	Zfp282 protein	Zfp282	657	72089	4	1
Q05CC7	Rbbp8 protein (Fragment)	Rbbp8	706	78867	5	3
Q3TBW3	Phosphatidylinositol 4,5-bisphosphate 3-kinase catalytic subunit delta isoform	Pik3cd	1046	120041	6	3
A0A0R5RP33	Sodium channel protein	Scn10a	1957	220259	4	3
Q3U3Y1	Putative uncharacterized protein	Arel1 1110018G07Rik	823	94218	6	3
Q9WVR4	Fragile X mental retardation syndrome-related protein 2	Fxr2 Fxr2h	673	73743	16	4
Q8R3F9	Speckle targeted PIP5K1A-regulated poly(A) polymerase (Star-PAP) (EC 2.7.7.19) (RNA-binding motif protein 21) (RNA-binding protein 21) (U6 snRNA-specific terminal uridylyltransferase 1) (U6-TUTase) (EC 2.7.7.52)	Tut1 Rbm21	869	94603	6	2
E9Q8F9	Protein 6030445D17Rik	6030445D17Rik	148	15536	36	4
A0A0R4J0E4	Integrator complex subunit 7	Ints7	966	106876	11	5
E0CXS9	Transducin-like enhancer protein 3	Tle3	767	82985	14	4
Q6IFT4	Rho GTPase-activating protein 20 (RA and RhoGAP domain-containing protein) (RARhoGAP) (Rho-type GTPase-activating protein 20)	Arhgap20 Kiaa1391	1182	131373	4	3
Q8BTG3	T-complex protein 11-like protein 1	Tcp11l1	509	56332	7	2
Q4VC33	Macrophage erythroblast attacher (Erythroblast macrophage protein)	Maea Emp	396	45336	5	1
P97496	SWI/SNF complex subunit SMARCC1 (BRG1-associated factor 155) (SWI/SNF complex 155 kDa subunit) (SWI/SNF-related matrix-associated actin-dependent regulator of chromatin subfamily C member 1) (SWI3-related protein) (BAF155)	Smarcc1 Baf155 Srg3	1104	122890	8	5
E9Q876	Protein Abca12	Abca12	2595	292590	3	3
Q3UV20	Putative uncharacterized protein	Mdga2	1025	114934	4	2
Q80U12	Small G protein signaling modulator 2 (RUN and TBC1 domain-containing protein 1)	Sgsm2 Kiaa0397 Rutbc1	1005	113076	7	6
Q05DP4	Ankrd11 protein (Fragment)	Ankrd11	455	50084	4	1
Q8VDL4	ADP-dependent glucokinase (ADP-GK) (ADPGK) (EC 2.7.1.147)	Adpgk	496	53903	11	2
Q8VIM6	Stereocilin	Strc	1809	196345	3	2
B7ZNH7	Collagen alpha-1(XIV) chain (Collagen, type XIV, alpha 1) (Procollagen, type XIV, alpha 1, isoform CRA_a)	Col14a1 mCG_11867	1794	192753	9	5
Q8BKN5-2	Gamma-tubulin complex component 5 (GCP-5)	Tubgcp5 Kiaa1899	1024	110604	9	3
Q6A0A9	Constitutive coactivator of PPAR-gamma-like protein 1 (Oxidative stress-associated Src activator) (Protein FAM120A)	FAM120A Kiaa0183 Ossa	1112	121646	2	1
A0A0A6YVS6	Ras/Rap GTPase-activating protein SynGAP (Fragment)	Syngap1	1281	141902	6	3
F6RUK9	Pleckstrin homology-like domain family B member 1 (Fragment)	Phldb1	1131	125072	6	5
Q3TN09	Transcriptional regulator, SIN3B (Yeast), isoform CRA_e	Sin3b mCG_5634	293	32846	19	2
F8WGE3	ATP-binding cassette sub-family A member 8-A	Abca8a	1619	183830	8	5
P56812	Programmed cell death protein 5 (TF-1 cell apoptosis-related protein 19) (Protein TFAR19)	Pdcd5 Tfar19	126	14275	20	1
Q3UVV9	von Willebrand factor A domain-containing protein 3A	Vwa3a	1148	130106	4	2
Q6ZQ58	La-related protein 1 (La ribonucleoprotein domain family member 1)	Larp1 Kiaa0731 Larp	1072	121125	4	2
Q8K3I4	Rab effector MyRIP (Exophilin-8) (Myosin-VIIa- and Rab-interacting protein) (Synaptotagmin-like protein lacking C2 domains C) (SlaC2-c) (Slp homolog lacking C2 domains c)	Myrip Slac2c	856	94924	4	2
P46662	Merlin (Moesin-ezrin-radixin-like protein) (Neurofibromin-2) (Schwannomin)	Nf2 Nf-2	596	69776	10	2
E9Q6A7	Protein Bptf	Bptf	2921	321597	9	2
Q3U247	Putative uncharacterized protein	Nab2	342	36349	9	1
Q9JIF7	Coatomer subunit beta (Beta-coat protein) (Beta-COP)	Copb1 Copb	953	107066	8	3
C0LL95	Nephrosis 2-like protein	Nphs2	395	43401	9	1
A2AG58	Uncharacterized protein CXorf23 homolog		752	90112	6	3
Q8C0D0-2	Probable tRNA pseudouridine synthase 1 (EC 5.4.99.-)	Trub1	338	26096	16	2
A0A0R4J1L0	Activated CDC42 kinase 1	Tnk2	1008	111735	4	2
Q3U2B7	Phospholipid-transporting ATPase (EC 3.6.3.1)	Atp11b	841	95291	4	2
Q91ZU9	Glutamate receptor ionotropic, NMDA 3B (GluN3B) (N-methyl-D-aspartate receptor subunit NR3B) (NMDAR3B) (NR3B) (NMDA receptor 4) (Nr4)	Grin3b	1003	109158	4	2
Q61468	Mesothelin (Pre-pro-megakaryocyte-potentiating factor) [Cleaved into: Megakaryocyte-potentiating factor (MPF); Mesothelin, cleaved form]	Msln Mes Mpf	625	69423	8	3
Q3UJJ8	Putative uncharacterized protein (Fragment)	Rdx	652	76369	9	4
Q9DC69	NADH dehydrogenase [ubiquinone] 1 alpha subcomplex subunit 9, mitochondrial (Complex I-39kD) (CI-39kD) (NADH-ubiquinone oxidoreductase 39 kDa subunit)	Ndufa9	377	42525	11	1
P11416	Retinoic acid receptor alpha (RAR-alpha) (Nuclear receptor subfamily 1 group B member 1)	Rara Nr1b1	462	50735	14	2
A0A097ZP89	Kinesin-like protein	Kif12	648	71200	9	3
Q6IFT3	Keratin Kb40	Krt78	800	85239	8	3
A1E2B8	Inducible heat shock protein 70		641	70131	42	1
Q9CQ75	NADH dehydrogenase [ubiquinone] 1 alpha subcomplex subunit 2 (Complex I-B8) (CI-B8) (NADH-ubiquinone oxidoreductase B8 subunit)	Ndufa2	99	10916	59	2
Q62137-2	Tyrosine-protein kinase JAK3 (EC 2.7.10.2) (Janus kinase 3) (JAK-3)	Jak3	1100	146899	2	1
Q9JHC9-4	ETS-related transcription factor Elf-2 (E74-like factor 2) (New ETS-related factor)	Elf2 Nerf	593	57003	8	2
Q9D2G2	Dihydrolipoyllysine-residue succinyltransferase component of 2-oxoglutarate dehydrogenase complex, mitochondrial (EC 2.3.1.61) (2-oxoglutarate dehydrogenase complex component E2) (OGDC-E2) (Dihydrolipoamide succinyltransferase component of 2-oxoglutarate dehydrogenase complex) (E2K)	Dlst	454	48995	13	3
E9Q446	E3 ubiquitin-protein ligase RNF25	Rnf25	455	51098	4	1
Q9QXZ0	Microtubule-actin cross-linking factor 1 (Actin cross-linking family 7)	Macf1 Acf7 Aclp7 Macf	7354	831894	31	2
B9EHS3	Hisppd2a protein	Ppip5k1 Hisppd2a	1486	165419	6	5
Q9QYC0-2	Alpha-adducin (Erythrocyte adducin subunit alpha)	Add1	735	69887	7	2
P23927	Alpha-crystallin B chain (Alpha(B)-crystallin) (P23)	Cryab Crya2	175	20069	25	1
Q3URP1	Putative uncharacterized protein (Fragment)	Setd1b BC035291	737	79265	7	1
A0A0R4J0G9	Methionine synthase reductase	Mtrr	696	77522	4	1
Q923X1	Adhesion G protein-coupled receptor L4 (EGF, latrophilin seven transmembrane domain-containing protein 1)	Adgrl4 Eltd1	739	82246	8	2
Q3UG15	A disintegrin and metallopeptidase domain 9 (Meltrin gamma), isoform CRA_a	Adam9 mCG_14516	845	92050	8	3
Q05CH9	E3 ubiquitin-protein ligase RNF123 (Rnf123 protein) (Fragment)	Rnf123	1239	140649	10	5
P11404	Fatty acid-binding protein, heart (Fatty acid-binding protein 3) (Heart-type fatty acid-binding protein) (H-FABP) (Mammary-derived growth inhibitor) (MDGI)	Fabp3 Fabph1	133	14819	42	2
Q3V028	Putative uncharacterized protein	Cyld	952	106626	6	2
Q06219	Nuclear receptor subfamily 4 group A member 2 (NUR-related factor 1) (Orphan nuclear receptor NURR1)	Nr4a2 Nurr1	598	66593	4	1
Q9Z1X4-3	Interleukin enhancer-binding factor 3	Ilf3	898	97766	4	2
B2RY77	Phosphodiesterase (EC 3.1.4.-)	Pde11a	933	104593	3	2
Q3TZH4	Granzyme B (Granzyme B(G,H))	Gzmb mCG_130827	247	27470	13	2
G3XA34	Zinc finger protein 316 (Zinc finger protein 316, isoform CRA_a)	Zfp316 mCG_52008	1017	110943	1	1
O35604	Niemann-Pick C1 protein	Npc1	1277	142884	4	2
Q8C8Z3	Putative uncharacterized protein	Pcdhb22	794	86840	4	2
Q3V1N1	Malignant fibrous histiocytoma-amplified sequence 1 homolog	Mfhas1	1048	116599	6	3
Q9CQA5	Mediator of RNA polymerase II transcription subunit 4 (Mediator complex subunit 4)	Med4 Vdrip	270	29781	13	1
Q14AS7	Serine (Or cysteine) peptidase inhibitor, clade A, member 3C	Serpina3c	417	46677	48	3
A0A087WQH4	Voltage-dependent calcium channel subunit alpha-2/delta-4	Cacna2d4	1119	126012	2	1
Q922Y0	Dual specificity tyrosine-phosphorylation-regulated kinase 3 (EC 2.7.12.1)	Dyrk3	586	65572	14	4
Q8BU22	Kinesin-like protein	Kif2c	721	81013	15	7
Q149Z9	Histone H1.3 (Histone cluster 1, H1d) (MCG50184)	Hist1h1d mCG_50184	221	22100	36	4
Q3UY05	Putative uncharacterized protein	Ndufs8	212	24037	8	1
B5B2Q4	Nuclear factor of activated T-cells c2 isoform IA-IIS-deltaXa (Nuclear factor of activated T-cells c2 isoform IB-IIS-deltaXa)	Nfatc2	706	76966	6	2
Q60520-1	Paired amphipathic helix protein Sin3a (Histone deacetylase complex subunit Sin3a) (Transcriptional corepressor Sin3a)	Sin3a Kiaa4126	1274	145474	4	3
A0A0R4J0K2	Cytoskeleton-associated protein 5	Ckap5	2011	223517	10	2
P50427	Steryl-sulfatase (EC 3.1.6.2) (Arylsulfatase C) (ASC) (Steroid sulfatase) (Steryl-sulfate sulfohydrolase)	Sts	624	66591	8	3
Q8K4B0	Metastasis-associated protein MTA1	Mta1	715	80798	10	3
Q80U36	MKIAA0325 protein (Fragment)	Dync1h1 Dnchc1 mKIAA0325	1999	228613	10	13
O08715	A-kinase anchor protein 1, mitochondrial (Dual specificity A-kinase-anchoring protein 1) (D-AKAP-1) (Protein kinase A-anchoring protein 1) (PRKA1) (Spermatid A-kinase anchor protein) (S-AKAP)	Akap1 Akap	857	92195	6	2
E9Q3M9	Protein 2010300C02Rik	2010300C02Rik	1175	125910	11	2
Q9BDB7-2	Interferon-induced protein 44-like [Cleaved into: Minor histocompatibility antigen HA-28 (HLA-HA28) (IFL8)]	Ifi44l H28	447	44004	15	2
P09026	Homeobox protein Hox-B3 (Homeobox protein Hox-2.7) (Homeobox protein MH-23)	Hoxb3 Hox-2.7 Hoxb-3	433	44353	5	1
Q6ZQA0-2	Neurobeachin-like protein 2	Nbeal2 Kiaa0540	2742	302052	5	5
H7BX49	WD repeat-containing protein 90	Wdr90	1892	204969	7	5
Q91ZF4	Cathepsin Q (Cathepsin Q, isoform CRA_a) (Protein Ctsq)	Ctsq CtsQ mCG_3444	343	38705	6	1
Q3TA05	Putative uncharacterized protein	Lnpep	158	16367	49	5
Q3UPL0	Protein transport protein Sec31A (SEC31-like protein 1) (SEC31-related protein A)	Sec31a Sec31l1	1230	133569	4	2
A3KGV1	Outer dense fiber protein 2 (84 kDa outer dense fiber protein) (Cenexin) (Outer dense fiber of sperm tails protein 2)	Odf2 Odf84	830	95541	8	3
B7ZNF7	Myo18b protein (Fragment)	Myo18b	1357	153440	3	2
Q6PFH3	DDB1- and CUL4-associated factor 15	Dcaf15	600	66643	6	3
B2RSW8	Pericentriolar material 1 (Pericentriolar material 1, isoform CRA_b)	Pcm1 mCG_17738	2025	228831	1	1
P39447	Tight junction protein ZO-1 (Tight junction protein 1) (Zona occludens protein 1) (Zonula occludens protein 1)	Tjp1 Zo1	1745	194740	4	4
O88783	Coagulation factor V (Activated protein C cofactor) [Cleaved into: Coagulation factor V heavy chain; Coagulation factor V light chain]	F5	2183	247228	3	3
A0A0N4SWG4	Phosphodiesterase (EC 3.1.4.-)	Pde1c	766	86517	6	2
E9PWZ8	Radial spoke head 14 homolog	Rsph14 Rtdr1	374	41609	7	2
E9QMY8	IQ and AAA domain-containing protein 1	Iqca	829	96742	9	1
B2RSU5	Intraflagellar transport 140 homolog (Chlamydomonas)	Ift140	1464	165904	6	4
G5E866	Splicing factor 3B subunit 1 (Splicing factor 3b, subunit 1)	Sf3b1 mCG_117542	1304	145830	7	6
Q6ZQ98	MKIAA0543 protein (Fragment)	mKIAA0543	937	104331	5	2
Q3UN62	Putative uncharacterized protein	Svs2 Semg1	375	40867	11	2
H3BJ40	Rho guanine nucleotide exchange factor 2 (Rho/rac guanine nucleotide exchange factor (GEF) 2, isoform CRA_b)	Arhgef2 mCG_8844	970	110204	8	3
Q6P8K2	Smarca4 protein (Fragment)	Smarca4	590	63912	6	1
Q569Z5	Probable ATP-dependent RNA helicase DDX46 (EC 3.6.4.13) (DEAD box protein 46)	Ddx46 Kiaa0801	1032	117448	9	3
E9PV24-2	Fibrinogen alpha chain [Cleaved into: Fibrinopeptide A; Fibrinogen alpha chain]	Fga	789	61326	27	1
P59240	Nephrocystin-4 (Nephroretinin)	Nphp4	1425	157268	12	4
Q0PM14	Toll-like receptor	Tlr6	806	92380	5	2
Q6PFE7-2	Tomoregulin-1 (TR-1) (M7365) (Transmembrane protein with EGF-like and one follistatin-like domain)	Tmeff1	372	40185	6	1
Q8CIM1	Leucine-rich repeat-containing protein 45	Lrrc45	670	76384	4	2
Q8BTW9	Serine/threonine-protein kinase PAK 4 (EC 2.7.11.1) (p21-activated kinase 4) (PAK-4)	Pak4 Kiaa1142	593	64623	8	2
Q52L52	Hsf1 protein	Hsf1	477	51704	12	2
E9PYV4	Protein Niban	Fam129a	584	66825	13	4
Q05722	Collagen alpha-1(IX) chain	Col9a1	921	92092	16	7
Q8BIA1	Putative uncharacterized protein	Fryl	869	98621	41	4
Q8C863	E3 ubiquitin-protein ligase Itchy (EC 6.3.2.-)	Itch	864	98994	5	1
Q9JL35	High mobility group nucleosome-binding domain-containing protein 5 (Nucleosome-binding protein 1) (Nucleosome-binding protein 45) (NBP-45) (Protein GARP45)	Hmgn5 Garp45 Nsbp1	406	45344	6	1
A2A5Z6	E3 ubiquitin-protein ligase SMURF2 (EC 6.3.2.-) (SMAD ubiquitination regulatory factor 2) (SMAD-specific E3 ubiquitin-protein ligase 2)	Smurf2	748	86175	8	3
F7CGG2	Transformation/transcription domain-associated protein (Fragment)	Trrap	3587	405542	2	3
Q3USJ7	Putative uncharacterized protein (Fragment)	Dyrk1a Gm10783	194	19817	11	1
O35711-4	Liprin-beta-2 (Coiled-coil-like protein 1) (Protein tyrosine phosphatase receptor type f polypeptide-interacting protein-binding protein 2) (PTPRF-interacting protein-binding protein 2)	Ppfibp2 Cclp1	882	101143	7	2
O88307	Sortilin-related receptor (Gp250) (Low-density lipoprotein receptor relative with 11 ligand-binding repeats) (LDLR relative with 11 ligand-binding repeats) (LR11) (SorLA-1) (Sorting protein-related receptor containing LDLR class A repeats) (mSorLA)	Sorl1	2215	247085	4	4
Q99PL5-2	Ribosome-binding protein 1 (Ribosome receptor protein) (RRp) (mRRp)	Rrbp1	1605	86953	11	4
E9PYR7	Protein Mctp1	Mctp1	319	36396	5	1
G3X9E0	Ankyrin repeat domain-containing protein 45 (MCG9408)	Ankrd45 mCG_9408	282	31689	9	1
Q3TZ03	Biotin--protein ligase (Holocarboxylase synthetase (Biotin-[propriony-Coenzyme A-carboxylase (ATP-hydrolysing)] ligase), isoform CRA_a)	Hlcs mCG_117171	722	78516	6	2
Q3TCX3	UPF0469 protein KIAA0907	Kiaa0907	612	64563	8	2
A2AI08	Taperin	Tprn	749	80089	5	1
S4R234	Cation-transporting ATPase (EC 3.6.3.-)	Atp13a4	1193	132753	4	4
Q9JJZ2	Tubulin alpha-8 chain (Alpha-tubulin 8)	Tuba8	449	50052	31	5
A0A0R4J014	Transcription factor E2-alpha	Tcf3	652	67772	5	1
E9QQ10	A-kinase anchor protein 9	Akap9	3779	434142	10	3
K3W4Q5	Protein Fam186a	Fam186a	3035	331481	3	3
A0A0A0MQ79	Protein PRRC2C	Prrc2c	2844	310721	5	4
Q3TQP7	Putative uncharacterized protein	Acat1	424	44802	12	3
Q3UUK5	Putative uncharacterized protein (Fragment)	Ppp1r9a	1042	116497	5	2
Q4FK74	ATP synthase subunit delta, mitochondrial (ATP synthase, H+ transporting, mitochondrial F1 complex, delta subunit, isoform CRA_c) (Atp5d protein)	Atp5d mCG_13414	168	17600	18	2
Q3UT76	Protein Zfp957	Zfp957 AU017455	567	62460	9	2
Q9WV30-3	Nuclear factor of activated T-cells 5 (NF-AT5) (Rel domain-containing transcription factor NFAT5) (T-cell transcription factor NFAT5)	Nfat5	1534	158009	3	3
Q3UI14	Putative uncharacterized protein	Kdm3b Jmjd1b	481	51173	20	4
P68404-2	Protein kinase C beta type (PKC-B) (PKC-beta) (EC 2.7.11.13)	Prkcb Pkcb Prkcb1	671	76894	3	1
B1Q450	Hemoglobin beta chain subunit	HBB1	147	15840	61	1
Q8R0N6-2	Hydroxyacid-oxoacid transhydrogenase, mitochondrial (HOT) (EC 1.1.99.24) (Alcohol dehydrogenase iron-containing protein 1) (ADHFe1)	Adhfe1	465	45015	5	1
Q3UHW2	Putative uncharacterized protein	Hsd17b4	735	79424	16	5
Q3U285	Ligand-dependent nuclear receptor corepressor-like protein (LCoR-like protein) (Mblk1-related protein 1) (Transcription factor MLR1)	Lcorl Mlr1	600	66695	14	4
Q8C9H6	Striatin-interacting proteins 2 (Protein FAM40B)	Strip2 Fam40b Kiaa1170 Stripb	844	96294	13	4
Q64487	Receptor-type tyrosine-protein phosphatase delta (Protein-tyrosine phosphatase delta) (R-PTP-delta) (EC 3.1.3.48)	Ptprd	1912	214408	3	3
Q8CFC7-2	CLK4-associating serine/arginine rich protein (Clk4-associating SR-related protein) (Serine/arginine-rich splicing factor 16) (Splicing factor, arginine/serine-rich 16) (Suppressor of white-apricot homolog 2)	Clasrp Clasp Sfrs16 Srsf16 Swap2	668	65969	4	1
Q01098	Glutamate receptor ionotropic, NMDA 2C (GluN2C) (Glutamate [NMDA] receptor subunit epsilon-3) (N-methyl D-aspartate receptor subtype 2C) (NMDAR2C) (NR2C)	Grin2c	1239	135420	8	1
Q9R0C0	Biogenesis of lysosome-related organelles complex 1 subunit 6 (BLOC-1 subunit 6) (Pallid protein) (Pallidin) (Syntaxin 13-interacting protein)	Bloc1s6 P2 Pa Pldn	172	19682	16	1
V9GXG1	Protein SLFN14 [Cleaved into: C-terminally truncated SLFN14 endoribonuclease (EC 3.1.-.-) (Schlafen family member 14)]	Slfn14	899	101690	8	4
A0A0A6YWG7	Rap guanine nucleotide exchange factor 2	Rapgef2	1644	184114	7	3
A0A0G2JFH2	Microtubule-associated protein (Fragment)	Map4	1441	152789	7	3
Q3TEU8	Coronin	Coro1c	474	53108	13	3
H3BKM0	AP-2 complex subunit beta	Ap2b1	913	101363	12	5
Q91WP6	Serine protease inhibitor A3N (Serpin A3N)	Serpina3n Spi2	418	46718	49	5
Q8BGR2	Volume-regulated anion channel subunit LRRC8D (Leucine-rich repeat-containing protein 5) (Leucine-rich repeat-containing protein 8D)	Lrrc8d Lrrc5	859	98113	8	1
P97813	Phospholipase D2 (PLD 2) (mPLD2) (EC 3.1.4.4) (Choline phosphatase 2) (PLD1C) (Phosphatidylcholine-hydrolyzing phospholipase D2)	Pld2	933	106168	13	5
Q8BKX1-3	Brain-specific angiogenesis inhibitor 1-associated protein 2 (BAI-associated protein 2) (BAI1-associated protein 2) (Insulin receptor substrate protein of 53 kDa) (IRSp53) (Insulin receptor substrate p53) (Insulin receptor tyrosine kinase 53 kDa substrate)	Baiap2	535	56863	7	1
Q8CDZ5	Putative uncharacterized protein	Nup133	1155	128606	3	2
D3YY95	Alpha-actinin-2	Actn2	159	18306	39	2
Q766H1	Cadherin-related neuronal receptor	CNR	946	102271	20	2
Q8BTM8-2	Filamin-A (FLN-A) (Actin-binding protein 280) (ABP-280) (Alpha-filamin) (Endothelial actin-binding protein) (Filamin-1) (Non-muscle filamin)	Flna Fln Fln1	2647	27426	30	1
Q8BM75	AT-rich interactive domain-containing protein 5B (ARID domain-containing protein 5B) (Developmentally and sexually retarded with transient immune abnormalities protein) (Desrt) (MRF1-like) (Modulator recognition factor protein 2) (MRF-2)	Arid5b Desrt Mrf2	1188	131837	4	2
Q04859	Serine/threonine-protein kinase MAK (EC 2.7.11.22) (Male germ cell-associated kinase) (Protein kinase RCK)	Mak Rck	622	70080	10	3
Q3UYD0	Putative uncharacterized protein	Utp14a	767	87318	15	5
Q8C9W3	A disintegrin and metalloproteinase with thrombospondin motifs 2 (ADAM-TS 2) (ADAM-TS2) (ADAMTS-2) (EC 3.4.24.14) (Procollagen I N-proteinase) (PC I-NP) (Procollagen I/II amino propeptide-processing enzyme) (Procollagen N-endopeptidase) (pNPI)	Adamts2	1213	135299	2	1
E9PZQ0	Ryanodine receptor 1 (RYR-1) (RyR1) (Skeletal muscle calcium release channel) (Skeletal muscle ryanodine receptor) (Skeletal muscle-type ryanodine receptor) (Type 1 ryanodine receptor)	Ryr1	5035	565047	2	8
Q9CY10	Putative uncharacterized protein		142	15202	31	3
A2BH40-2	AT-rich interactive domain-containing protein 1A (ARID domain-containing protein 1A) (BRG1-associated factor 250) (BAF250) (BRG1-associated factor 250a) (BAF250A) (Osa homolog 1) (SWI-like protein) (SWI/SNF complex protein p270) (SWI/SNF-related, matrix-associated, actin-dependent regulator of chromatin subfamily F member 1)	Arid1a Baf250 Baf250a Osa1 Smarcf1	2283	206486	4	2
Q3TSG8	Putative uncharacterized protein	Trap1	706	80171	53	2
Q8BMI0	F-box only protein 38 (Modulator of KLF7 activity) (MoKA)	Fbxo38	1194	133928	5	3
O88844	Isocitrate dehydrogenase [NADP] cytoplasmic (IDH) (EC 1.1.1.42) (Cytosolic NADP-isocitrate dehydrogenase) (IDP) (NADP(+)-specific ICDH) (Oxalosuccinate decarboxylase)	Idh1	414	46674	7	2
Q3V0B4	Coiled-coil domain-containing protein 108	Ccdc108	1847	209132	5	4
E9Q7N5	Ribosome-releasing factor 2, mitochondrial	Gfm2	741	82026	6	2
Q3UC32	Actin-related protein 2/3 complex subunit 5	Arpc5	151	16289	32	2
Q5SQM0	Echinoderm microtubule-associated protein-like 6 (EMAP-6) (Echinoderm microtubule-associated protein-like 5-like)	Eml6 Eml5l	1958	217940	5	4
Q80T95	MKIAA1756 protein (Fragment)	Syne1 mKIAA1756	991	114876	4	2
E9PVB5	Tetratricopeptide repeat protein 17 (TPR repeat protein 17)	Ttc17	1198	135521	4	2
E9QKC0	Glutamate receptor 2	Gria2	883	98818	7	2
Q3T9E1	Putative uncharacterized protein	Mtor Frap1	1033	115127	5	3
Q3UVG3	Protein FAM91A1	Fam91a1 D15Ertd621e Kiaa0493	837	93464	7	3
Q8JZM8	Mucin-4 (MUC-4) (Ascites sialoglycoprotein) (ASGP) (Pancreatic adenocarcinoma mucin) (Testis mucin) [Cleaved into: Mucin-4 alpha chain (Ascites sialoglycoprotein 1) (ASGP-1); Mucin-4 beta chain (Ascites sialoglycoprotein 2) (ASGP-2)]	Muc4	3443	365519	3	5
Q8VIJ6	Splicing factor, proline- and glutamine-rich (DNA-binding p52/p100 complex, 100 kDa subunit) (Polypyrimidine tract-binding protein-associated-splicing factor) (PSF) (PTB-associated-splicing factor)	Sfpq Psf	699	75442	8	3
Q3TXS9	Putative uncharacterized protein	Rps2	293	31188	8	1
B2RUS7	ATP-binding cassette, sub-family C (CFTR/MRP), member 8 (Protein Abcc8)	Abcc8	1588	178069	2	1
Q05C01	Pcdha6 protein (Fragment)	Pcdha2 Pcdha6	926	99787	17	2
F8VQE9	Arf-GAP with GTPase, ANK repeat and PH domain-containing protein 3	Agap3	910	97695	5	3
D1FNM9	Calcium-transporting ATPase (EC 3.6.3.8)	Atp2b4	1205	133054	6	2
A0A140LHU9	Neuropathy target esterase	Pnpla6	1316	145233	7	5
A0A0G2JF63	Threonine--tRNA ligase, mitochondrial (Fragment)	Tars2	209	23350	15	1
Q9D4H4	Angiomotin-like protein 1 (junction-enriched and -associated protein) (JEAP)	Amotl1	968	107950	11	4
G3UZ87	Dystrobrevin	Dtnb	609	69024	12	4
Q8BI18	Putative uncharacterized protein	Loxhd1	996	113312	5	3
A2A791	Zinc finger MYM-type protein 4 (Zinc finger protein 262)	Zmym4 Kiaa0425 Zfp262 Znf262	1549	172437	7	3
F6X2K7	Ataxin-7-like protein 1 (Fragment)	Atxn7l1	843	89562	8	3
Q3TMP1	General transcription factor IIIC, polypeptide 3 (Protein Gtf3c3)	Gtf3c3 AL022818	882	100621	4	2
Q6NWW5	Kinesin-like protein KIF24	Kif24	1356	150206	3	2
E9QMW4	Uncharacterized protein C16orf96 homolog		1145	127660	3	3
O88559-2	Menin	Men1	611	61453	9	4
Q4KKZ9	NFKB activating protein-like	Nkapl	395	44994	23	3
P63101	14-3-3 protein zeta/delta (Protein kinase C inhibitor protein 1) (KCIP-1) (SEZ-2)	Ywhaz	245	27771	69	6
E9Q2D0	WAS/WASL-interacting protein family member 3	Wipf3	483	49256	10	2
P21981	Protein-glutamine gamma-glutamyltransferase 2 (EC 2.3.2.13) (Tissue transglutaminase) (Transglutaminase C) (TG(C)) (TGC) (TGase C) (Transglutaminase-2) (TGase-2)	Tgm2	686	77061	3	2
E9QLE4	Sodium leak channel non-selective protein	Nalcn	1739	200553	4	2
Q3UHU8	General transcription factor II-I	Gtf2i	962	108350	8	2
Q9ET01	Glycogen phosphorylase, liver form (EC 2.4.1.1)	Pygl	850	97463	7	1
A2AT91	Phosphoinositide phospholipase C (EC 3.1.4.11) (Fragment)	Plcb4	883	100651	2	1
Q6PGF5	BMS1 homolog, ribosome assembly protein (Yeast) (BMS1-like, ribosome assembly protein (Yeast)) (Protein Bms1)	Bms1 Bms1l mCG_133436	1284	145413	6	3
Q3U6V3	Putative uncharacterized protein	Hspa5	655	72382	39	1
Q3TJ66	Fructose-bisphosphate aldolase (EC 4.1.2.13)	Aldob	364	39521	21	3
Q6P9Q4	FH1/FH2 domain-containing protein 1 (Formin homolog overexpressed in spleen 1) (FHOS) (Formin homology 2 domain-containing protein 1)	Fhod1 Fhos1	1197	129600	8	5
Q6P9P6	Kinesin-like protein KIF11 (Kinesin-related motor protein Eg5)	Kif11	1052	118026	6	3
Q6DMP4	High molecular weight kininogen II	Kng2	634	70178	12	3
Q69ZW3	EH domain-binding protein 1	Ehbp1 Kiaa0903	1231	139104	6	4
A0A0G2JF55	Methylcytosine dioxygenase TET2	Tet2	1920	213009	2	2
E9QPQ6	E3 ubiquitin-protein ligase pellino homolog 2	Peli2	419	46173	6	1
Q9D9E3	Putative uncharacterized protein	1700093J21Rik	100	11226	29	1
Q68FM7	Protein Arhgef11 (Rho guanine nucleotide exchange factor (GEF) 11)	Arhgef11	1552	171802	3	3
Q148V7	LisH domain and HEAT repeat-containing protein KIAA1468	Kiaa1468	1216	134586	4	2
Q6I6G8	E3 ubiquitin-protein ligase HECW2 (EC 6.3.2.-) (HECT, C2 and WW domain-containing protein 2) (NEDD4-like E3 ubiquitin-protein ligase 2)	Hecw2 Kiaa1301 Nedl2	1578	176234	2	2
Q571L9	MKIAA4041 protein (Fragment)	Celsr1 mKIAA4041	1671	183111	8	5
Q9CXW2	28S ribosomal protein S22, mitochondrial (MRP-S22) (S22mt)	Mrps22 Rpms22	359	41192	17	3
O88196-3	E3 ubiquitin-protein ligase TTC3 (EC 6.3.2.-) (TPR repeat protein D) (Mtprd)	Ttc3 Kiaa4119	1979	221881	5	5
Q3TIU7	Putative uncharacterized protein	Ndufs1	726	79663	41	17
Q571A9	MKIAA4039 protein (Fragment)	Spock3 mKIAA4039	488	54619	6	2
Q9JJ28	Protein flightless-1 homolog	Flii Fli1 Fliih	1271	144803	6	3
Q80VD1	Protein FAM98B	Fam98b	429	45349	6	2
Q14A64	Arylalkylamine N-acetyltransferase (Serotonin N-acetyltransferase)	Aanat mCG_6838	205	23069	13	1
Q3TX19	Putative uncharacterized protein	Vps53	832	94481	11	3
Q3UNZ1	Putative uncharacterized protein	Ghdc D11Lgp1e	532	58448	9	3
D3YVF0	A-kinase anchor protein 5 (AKAP-5) (A-kinase anchor protein 150 kDa) (AKAP 150) (P150) (cAMP-dependent protein kinase regulatory subunit II high affinity-binding protein)	Akap5 Akap150	745	79397	14	5
G3UYS2	Cellular tumor antigen p53	Trp73	367	41009	5	1
O35857	Mitochondrial import inner membrane translocase subunit TIM44	Timm44 Mimt44 Tim44	452	51091	8	2
Q3UV38	Putative uncharacterized protein (Fragment)	Tpcn1	797	92423	6	2
Q8K1S6	Protein spire homolog 2 (Spir-2)	Spire2 spir-2	718	80210	22	7
Q5SV77-2	Gametogenetin-binding protein 2 (Dioxin-inducible factor 3) (DIF-3) (Protein ZNF403)	Ggnbp2 Zfp403 Znf403	696	79263	10	3
Q3UG81	Serine/threonine-protein kinase PLK (EC 2.7.11.21) (Polo-like kinase)	Plk1	603	68286	6	1
Q3U449	Bisphosphate 3'-nucleotidase 1, isoform CRA_a	Bpnt1 mCG_12384	308	33243	11	1
A0A0U1RP94	Casein kinase I isoform gamma-1	Csnk1g1	461	53030	10	3
Q8CGS7	Neuronal apoptosis inhibitory protein 2	Naip2 Birc1b	1447	164102	5	3
O88282	B-cell CLL/lymphoma 6 member B protein (Bcl6-associated zinc finger protein)	Bcl6b Bazf	474	51339	8	2
Q0VF55	Calcium-transporting ATPase (EC 3.6.3.8)	Atp2b3	1220	134360	11	4
F8WJD4	Symplekin	Sympk	1288	142620	9	4
Z4YK18	VWFA and cache domain-containing protein 1	Cachd1	1210	135210	8	5
Q571B8	Histone-lysine N-methyltransferase, H3 lysine-79 specific (EC 2.1.1.43) (Histone H3-K79 methyltransferase) (Fragment)	mKIAA1814	1565	165080	7	4
Q8CCJ9	PHD finger protein 20-like protein 1	Phf20l1	1013	113860	18	3
A2AFQ0	E3 ubiquitin-protein ligase HUWE1	Huwe1	4378	482697	8	14
Q3U1Y4-2	DENN domain-containing protein 4B (Brain-specific gene 4 protein) (Brain specific protein 4)	Dennd4b Bsg4 Bsp4 Kiaa0476	1499	134133	2	2
Q7M700	Kinesin light chain 1D	Klc1 Kns2	615	69316	6	2
O70472	Transmembrane protein 131 (Protein RW1)	Tmem131 D1Bwg0491e Kiaa0257 Rw1	1877	204650	13	9
Q8BFZ4	F-box/LRR-repeat protein 21 (F-box and leucine-rich repeat protein 21) (F-box and leucine-rich repeat protein 3B) (F-box/LRR-repeat protein 3B)	Fbxl21 Fbl21 Fbxl3b	434	49154	9	2
P01101	Proto-oncogene c-Fos (Cellular oncogene fos)	Fos	380	40838	11	3
Q5DTZ0	Protein NYNRIN (NYN domain and retroviral integrase catalytic domain-containing protein) (Pol-like protein)	Nynrin Kiaa1305	1840	203066	5	7
Q3UH45	Protein Tecpr2	Tecpr2	1423	154938	5	3
B1AWB9	Collagen alpha-1(V) chain (Collagen, type V, alpha 1)	Col5a1	1838	183676	7	5
Q6GQS8	Protein Gm21093 (Uncharacterized protein)	4933409K07Rik Gm21093	569	63331	5	1
P19157	Glutathione S-transferase P 1 (Gst P1) (EC 2.5.1.18) (GST YF-YF) (GST class-pi) (GST-piB) (Preadipocyte growth factor)	Gstp1 Gstpib	210	23609	37	1
Q60990	RNA-binding motif protein, Y chromosome, family 1 member B (RNA-binding motif protein 1)	Rbmy1b Gm3376 Rbm	380	43143	16	3
Q0VGT2	Zinc finger protein GLI2 (Tax helper protein)	Gli2 Thp	1544	165030	2	1
P97742	Carnitine O-palmitoyltransferase 1, liver isoform (CPT1-L) (EC 2.3.1.21) (Carnitine O-palmitoyltransferase I, liver isoform) (CPT I) (CPTI-L) (Carnitine palmitoyltransferase 1A)	Cpt1a Cpt-1 Cpt1	773	88252	8	4
Q1W617	Protein Shroom4	Shroom4 Kiaa1202	1475	163238	6	4
Q80TG1	KAT8 regulatory NSL complex subunit 1 (NSL complex protein NSL1) (Non-specific lethal 1 homolog)	Kansl1 Kiaa1267 Nsl1	1036	113179	15	5
A0A0G2JF23	Malate dehydrogenase (EC 1.1.1.37) (Fragment)	Mdh2	199	21047	58	4
A0A0R4J1E4	SPARC-related modular calcium-binding protein 1	Smoc1	463	51090	3	1
A2AAN2	Signal recognition particle subunit SRP68 (SRP68)	Srp68	587	65953	9	2
Q8C813	Putative uncharacterized protein	C230012O17Rik	172	17962	17	2
O54992-2	MAP kinase-activated protein kinase 5 (MAPK-activated protein kinase 5) (MAPKAP kinase 5) (MAPKAPK-5) (EC 2.7.11.1)	Mapkapk5	473	47103	11	2
Q8K400	Syntaxin-binding protein 5 (Lethal(2) giant larvae protein homolog 3) (Tomosyn-1)	Stxbp5 Kiaa4253 Llgl3	1152	127650	4	2
Q6NXL0	Phf21b protein (Fragment)	Phf21b	505	54556	10	2
B2RRD1	Tdrd6 protein	Tdrd6	1941	215957	5	4
P54754	Ephrin type-B receptor 3 (EC 2.7.10.1) (Developmental kinase 5) (mDK-5) (Tyrosine-protein kinase receptor SEK-4)	Ephb3 Etk2 Mdk5 Sek4	993	109662	5	2
O35551	Rab GTPase-binding effector protein 1 (Rabaptin-5) (Rabaptin-5alpha)	Rabep1 Rab5ep Rabpt5 Rabpt5a	862	99524	16	5
D3Z5K8	SH3 and multiple ankyrin repeat domains protein 2	Shank2	1841	200121	6	1
G5E8P2	Rho guanine nucleotide exchange factor 28 (Rho-guanine nucleotide exchange factor)	Arhgef28 Rgnef mCG_114987	1700	190487	2	2
P47968	Ribose-5-phosphate isomerase (EC 5.3.1.6) (Phosphoriboisomerase)	Rpia Rpi	303	32451	16	3
Q99L88	Beta-1-syntrophin (59 kDa dystrophin-associated protein A1 basic component 1) (DAPA1B) (Syntrophin-2)	Sntb1 Snt2b1	537	58081	15	4
Q566I6	Complement component 1, r subcomponent	C1ra C1r	707	80096	7	2
P50171	Estradiol 17-beta-dehydrogenase 8 (EC 1.1.1.62) (17-beta-hydroxysteroid dehydrogenase 8) (17-beta-HSD 8) (3-oxoacyl-[acyl-carrier-protein] reductase) (EC 1.1.1.-) (Protein Ke6) (Ke-6) (Testosterone 17-beta-dehydrogenase 8) (EC 1.1.1.239)	Hsd17b8 H2-Ke6 Hke6	259	26588	60	10
Q7TPM6	Fibronectin type III and SPRY domain-containing protein 1	Fsd1	496	55525	9	2
Q8BVN1	Putative uncharacterized protein	Serpina5	405	45628	21	4
Q8C6S9	Cilia- and flagella-associated protein 54	Cfap54	3106	353760	2	4
Q9QY06-2	Unconventional myosin-IXb (Unconventional myosin-9b)	Myo9b Myr5	2114	242236	3	2
Q9EQ20	Methylmalonate-semialdehyde dehydrogenase [acylating], mitochondrial (MMSDH) (Malonate-semialdehyde dehydrogenase [acylating]) (EC 1.2.1.18) (EC 1.2.1.27) (Aldehyde dehydrogenase family 6 member A1)	Aldh6a1	535	57916	11	2
E9PW15	Polycomb protein Suz12	Suz12	718	80293	2	1
P29621	Serine protease inhibitor A3C (Serpin A3C) (Kallikrein-binding protein) (KBP)	Serpina3c Klkbp	417	46766	46	4
Q8K0T7	Protein unc-13 homolog C (Munc13-3)	Unc13c	2210	249842	4	2
F7CD45	Protein Gm8334	Gm8334	553	57322	16	3
Q3TCQ3	Pyruvate carboxylase (EC 6.4.1.1)	Pcx	1179	129831	6	3
C3VPR6	Protein NLRC5	Nlrc5	1915	211708	7	7
Q61838	Pregnancy zone protein (Alpha-2-macroglobulin) (Alpha-2-M) [Cleaved into: Alpha-2-macroglobulin 165 kDa subunit; Alpha-2-macroglobulin 35 kDa subunit]	Pzp A2m	1495	165852	8	4
A2AJK6-3	Chromodomain-helicase-DNA-binding protein 7 (CHD-7) (EC 3.6.4.12) (ATP-dependent helicase CHD7)	Chd7	2986	331196	6	5
Q5S006	Leucine-rich repeat serine/threonine-protein kinase 2 (EC 2.7.11.1)	Lrrk2	2527	284730	4	4
C0KTP6	Potassium channel subfamily T member 1 (Sodium-activated potassium channel isoform A)	Kcnt1	1218	138477	2	2
E9QPR7	Down syndrome cell adhesion molecule-like protein 1 homolog	Dscaml1	2111	230252	7	5
Q4VA53	Sister chromatid cohesion protein PDS5 homolog B (Androgen-induced proliferation inhibitor) (Androgen-induced prostate proliferative shutoff-associated protein AS3)	Pds5b Aprin As3 Kiaa0979	1446	164418	5	3
Q3UE03	Putative uncharacterized protein	Cep104 BC046331	926	103874	15	6
Q8R5A6-2	TBC1 domain family member 22A	Tbc1d22a D15Ertd781e	516	59938	14	4
Q8C2B3	Histone deacetylase 7 (HD7) (EC 3.5.1.98) (Histone deacetylase 7A) (HD7a)	Hdac7 Hdac7a	938	101287	8	3
Q8C176	Transcription initiation factor TFIID subunit 2 (TBP-associated factor 150 kDa) (Transcription initiation factor TFIID 150 kDa subunit) (TAF(II)150) (TAFII-150) (TAFII150)	Taf2	1104	126997	9	6
Q99MD8-2	Myoneurin	Mynn	610	65514	20	6
Q80TJ1-2	Calcium-dependent secretion activator 1 (Calcium-dependent activator protein for secretion 1) (CAPS-1)	Cadps Caps Caps1 Kiaa1121	1355	154004	7	6
Q3UFQ8	Leucine-rich repeat-containing protein 16B (Capping protein, Arp2/3 and myosin-I linker protein 3) (CARMIL3)	Lrrc16b	1375	150416	4	3
O54824	Pro-interleukin-16 [Cleaved into: Interleukin-16 (IL-16) (Lymphocyte chemoattractant factor) (LCF)]	Il16	1322	141435	3	2
Q3U674	Putative uncharacterized protein	Apbb2	738	80695	9	2
Q5XW54	Death domain-associated protein (Fragment)	Daxx	621	68821	8	2
A0A0M3HEP2	Zinc finger E-box-binding homeobox 2	Zeb2	1259	141334	3	2
Q8VDJ3	Vigilin (High density lipoprotein-binding protein) (HDL-binding protein)	Hdlbp	1268	141742	7	3
Q8CFC2-2	Myelin transcription factor 1 (MyT1) (Neural zinc finger factor 2) (NZF-2)	Myt1 Kiaa0835 Nzf2	1127	118701	7	3
Q8CE21	Putative uncharacterized protein	Nolc1	700	73428	14	6
Q6P542	ATP-binding cassette sub-family F member 1	Abcf1	837	94945	3	2
Q3TTX0	Putative uncharacterized protein	Matr3	846	94616	8	3
P39688-2	Tyrosine-protein kinase Fyn (EC 2.7.10.2) (Proto-oncogene c-Fyn) (p59-Fyn)	Fyn	537	60059	8	2
O55029	Coatomer subunit beta' (Beta'-coat protein) (Beta'-COP) (p102)	Copb2	905	102449	9	3
Q8BI55	Dual specificity tyrosine-phosphorylation-regulated kinase 4 (EC 2.7.12.1)	Dyrk4	632	72561	9	2
F8SGS3	Testis-specific protein A8 (Fragment)	Tsga8	274	25889	14	2
Q3U5H6	Putative uncharacterized protein (Fragment)	Eif2s3x	330	35762	9	1
P12787	Cytochrome c oxidase subunit 5A, mitochondrial (Cytochrome c oxidase polypeptide Va)	Cox5a	146	16101	25	2
Q9JJH7	Transient receptor potential cation channel subfamily M member 5 (Long transient receptor potential channel 5) (LTrpC-5) (LTrpC5) (MLSN1- and TRP-related gene 1 protein)	Trpm5 Ltrpc5 Mtr1	1158	130844	9	5
Q66K08	Cartilage intermediate layer protein 1 (CILP-1) [Cleaved into: Cartilage intermediate layer protein 1 C1; Cartilage intermediate layer protein 1 C2]	Cilp	1184	132334	5	3
G4V4Z1	Gag-pro-pol polyprotein	gag-pro-pol	1737	194452	5	6
Q8VHG2-2	Angiomotin	Amot Kiaa1071	1126	95963	18	5
F8SLP9	PEX5-related protein (Peroxin 2, isoform CRA_a) (Peroxisomal biogenesis factor 5-like protein transcript variant 5)	Pex5l Pex2 mCG_5160	567	63139	7	1
Q80XP9	Serine/threonine-protein kinase WNK3 (EC 2.7.11.1) (Protein kinase lysine-deficient 3) (Protein kinase with no lysine 3)	Wnk3	1757	193990	5	3
B2RUR0	FYN binding protein (FYN binding protein, isoform CRA_f)	Fyb mCG_141112	819	90055	7	3
A0A140LI36	Androglobin	Adgb	1633	185690	5	3
Q00623	Apolipoprotein A-I (Apo-AI) (ApoA-I) (Apolipoprotein A1) [Cleaved into: Proapolipoprotein A-I (ProapoA-I); Truncated apolipoprotein A-I]	Apoa1	264	30616	14	2
Q02788	Collagen alpha-2(VI) chain	Col6a2	1034	110334	6	3
Q80ZW0	Serine/threonine-protein kinase 35 (Serine/threonine-protein kinase 35 L1) (EC 2.7.11.1)	Stk35 Stk35l1	539	59459	12	4
Q61852	Smooth muscle gamma-actin		393	42880	32	2
E9QLC6	SUMO-specific isopeptidase USPL1	Uspl1	1089	118404	5	3
Q6TXD4	Dynamin-binding protein (Scaffold protein Tuba)	Dnmbp Kiaa1010	1580	177276	3	2
Q60848-2	Lymphocyte-specific helicase (EC 3.6.4.-) (Proliferation-associated SNF2-like protein)	Hells Lsh Pasg	821	93786	8	4
Q0KK56	Protein FAM184B	Fam184b Kiaa1276 MNCb-2622	942	107601	6	3
Q7TPM9	Myotubularin-related protein 10	Mtmr10	771	88197	7	4
Q8BPF4	Putative uncharacterized protein		142	15181	40	1
G5E8C0	Zinc finger protein 697 (Zinc finger protein 697, isoform CRA_a)	Zfp697 mCG_1041496	569	63022	7	4
Q3UZL9	Putative uncharacterized protein	Tert	536	60749	7	3
Q6ZQ45	MKIAA0791 protein (Fragment)	Nup155 mKIAA0791	1423	158617	4	3
Q9WTI7-3	Unconventional myosin-Ic (Myosin I beta) (MMI-beta) (MMIb)	Myo1c	1063	119876	5	2
Q3UNA7	Putative uncharacterized protein	Gclc	637	72585	10	3
Q3TZY4	Transmembrane and coiled-coil domains protein 2	Tmcc2	628	69156	7	2
Q5DTN8	Janus kinase and microtubule-interacting protein 3 (Neuroendocrine long coiled-coil protein 2)	Jakmip3 Kiaa4091 Necc2	844	98715	10	4
B7ZNY0	Pde4dip protein	Pde4dip	2412	272315	3	3
Q8BKR5	Protein phosphatase 1 regulatory subunit 37 (Leucine-rich repeat-containing protein 68)	Ppp1r37 Lrrc68	712	77574	6	3
Q8K016	Inter-alpha trypsin inhibitor, heavy chain 2	Itih2	946	105946	10	5
Q2EMV9	Poly [ADP-ribose] polymerase 14 (PARP-14) (EC 2.4.2.30) (ADP-ribosyltransferase diphtheria toxin-like 8) (ARTD8) (Collaborator of STAT6) (CoaSt6)	Parp14 Kiaa1268	1817	203800	6	4
Q3UDQ7	Putative uncharacterized protein	Afg3l2	795	88749	8	2
B8X349	JNK-interacting leucine zipper protein long form	Spag9	1320	146131	7	4
Q8CIE2-3	Zinc finger MIZ domain-containing protein 2 (PIAS-like protein Zimp7)	Zmiz2 D11Bwg0280e Zimp7	920	94150	5	1
Q8VCC6	Cerebral cavernous malformations 2 protein-like (CCM2-like)	Ccm2l	481	52174	3	1
G3X8S2	BRF1 homolog, subunit of RNA polymerase III transcription initiation factor IIIB (S. cerevisiae) (Transcription factor IIIB 90 kDa subunit)	Brf1 mCG_15417	676	73803	8	2
Q80UE6	Serine/threonine-protein kinase WNK4 (EC 2.7.11.1) (Protein kinase lysine-deficient 4) (Protein kinase with no lysine 4)	Wnk4 Prkwnk4	1222	132410	5	2
E9PV22	Leucine-rich repeat-containing protein 47	Lrrc47	603	65904	16	4
B9EJ16	Myocd protein	Myocd	948	102169	4	1
Q61884	Meiosis-specific nuclear structural protein 1	Mns1	491	60236	6	2
Q6XBG1	ATP-binding cassette transporter sub-family A member 16	Abca16	1677	192202	3	3
A8Y5E7	Antizyme inhibitor 2	Azin2 Adc	323	35038	11	1
Q6PDM1	Male-specific lethal 1 homolog (MSL-1) (Hampin) (Male-specific lethal 1-like 1) (MSL1-like 1) (Male-specific lethal-1 homolog 1)	Msl1 Msl1l1	616	67320	9	3
Z4YJL4	182 kDa tankyrase-1-binding protein	Tnks1bp1	1058	112648	4	2
P59383	Leucine-rich repeat neuronal protein 4 (Neuronal leucine-rich repeat protein 4) (NLRR-4)	Lrrn4	733	80489	5	1
H3BK24	Homeobox protein cut-like	Cux1	1504	164503	4	4
G3X9F6	Protein Sh3tc1 (SH3 domain and tetratricopeptide repeats 1, isoform CRA_d)	Sh3tc1 mCG_7089	1346	149382	3	2
S4R286	Ankyrin repeat and sterile alpha motif domain-containing protein 1B	Anks1b	1259	139019	8	4
H7BX03	Tubulin monoglycylase TTLL3	Ttll3	928	104499	5	2
A0A0R4J1L6	Actin filament-associated protein 1-like 2	Afap1l2	769	85717	6	3
E9Q4N6	Protein Arid1b	Arid1b	1762	191226	6	5
Q925E1	Gamma-1-syntrophin (G1SYN) (Syntrophin-4) (SYN4)	Sntg1	517	57982	4	1
Q6PE87	UPF0704 protein C6orf165 homolog		622	70946	4	1
A0A0N4SVK8	[Protein ADP-ribosylarginine] hydrolase-like protein 1	Adprhl1	1697	184233	4	3
D3Z074	Protein diaphanous homolog 1	Diaph1	1220	135828	3	2
Q6NX74	Atm protein (Fragment)	Atm	790	90686	6	2
B7ZWC5	Abcc4 protein	Abcc4	1250	140269	6	3
A2AKH9	StAR-related lipid transfer protein 9 (Fragment)	Stard9	4143	454469	3	7
B2RR83	Probable ATP-dependent RNA helicase YTHDC2 (EC 3.6.4.13)	Ythdc2	1445	161091	6	5
B5X0E4	ATP-binding cassette sub-family B member 5 (ABCB5 P-gp) (P-glycoprotein ABCB5)	Abcb5	1255	137397	13	6
P49945	Ferritin light chain 2 (Ferritin L subunit 2) (Ferritin subunit LG)	Ftl2 Ftl-2	183	20843	64	4
Q9R1S3	GPI ethanolamine phosphate transferase 1 (EC 2.-.-.-) (Phosphatidylinositol-glycan biosynthesis class N protein) (PIG-N)	Pign	931	105045	4	1
Q8BL99	Protein dopey-1	Dopey1 D9Ertd809e	2399	269254	3	3
Q6A025	Protein phosphatase 1 regulatory subunit 26	Ppp1r26 Gm347 Kiaa0649	1163	124934	9	5
Q6PDG0	Nup205 protein (Fragment)	Nup205	2003	226930	3	3
A1L358	Myeloid zinc finger 1 (Protein Mzf1)	Mzf1	735	82462	6	2
A0A0R4J140	Clustered mitochondria protein homolog	Cluh	1353	151836	3	2
Q3URP6	Protein disulfide-isomerase (EC 5.3.4.1)	P4hb	509	56999	12	3
Q3TJB1	Protein Zmym1 (Zinc finger, MYM domain containing 1, isoform CRA_b)	Zmym1 mCG_10891	983	110419	4	1
Q9D415-4	Disks large-associated protein 1 (DAP-1) (Guanylate kinase-associated protein) (PSD-95/SAP90-binding protein 1) (SAP90/PSD-95-associated protein 1) (SAPAP1)	Dlgap1 Gkap Kiaa4162	992	104064	7	2
Q3UQ12	Putative uncharacterized protein (Fragment)	Hltf Smarca3	445	49965	10	4
Q3UG70	Putative uncharacterized protein	Polg	1217	136602	3	2
B9EKB0	Laminin B1 subunit 1	Lamb1 Lamb1-1	1834	202414	3	3
Q8CGP2	Histone H2B type 1-P	Hist1h2bp	126	13992	18	1
Q4VBE4	Pikachurin (EGF-like, fibronectin type-III and laminin G-like domain-containing protein) (Nectican)	Egflam	1017	110735	8	2
P53783	Transcription factor SOX-1	Sox1 Sox-1	391	39053	14	1
Q61699-2	Heat shock protein 105 kDa (42 degrees C-HSP) (Heat shock 110 kDa protein) (Heat shock-related 100 kDa protein E7I) (HSP-E7I)	Hsph1 Hsp105 Hsp110 Kiaa0201	858	91698	6	3
Q8CFQ3	Intron-binding protein aquarius	Aqr Kiaa0560	1481	170293	2	2
Q8BLW8	Protein Gm26558 (Fragment)	Gm26558	286	31589	9	3
Q3UH53-2	Protein sidekick-1	Sdk1	2193	211604	2	2
A0A0R4J1Q0	Enhancer of mRNA-decapping protein 4	Edc4	1390	150652	6	1
F8WIE5	E3 ubiquitin-protein ligase HECTD1	Hectd1	2610	289228	3	4
A0A0R4J0U3	Period circadian protein homolog 2	Per2	1257	135899	5	4
F6QI82	Chloride channel protein (Fragment)	Clcn1	923	101465	4	2
E9QAC9	Calcium-independent phospholipase A2-gamma	Pnpla8	711	80275	12	4
Q9CZ62	Centrosomal protein of 97 kDa (Cep97) (Leucine-rich repeat and IQ domain-containing protein 2)	Cep97 Lrriq2	856	94641	8	2
E9Q2V5	Protein BC037034	BC037034	580	62750	6	3
Q9QXS1-16	Plectin (PCN) (PLTN) (Plectin-1) (Plectin-6)	Plec Plec1	4691	517404	31	1
Q8CAP8	Putative uncharacterized protein	Mlh1	653	72046	4	1
A2AI19	Glutamate receptor ionotropic, NMDA 1	Grin1	901	101317	7	2
P28704	Retinoic acid receptor RXR-beta (MHC class I regulatory element-binding protein H-2RIIBP) (Nuclear receptor subfamily 2 group B member 2) (Retinoid X receptor beta)	Rxrb Nr2b2	520	55866	7	2
A2AG68	Copper-transporting ATPase 1	Atp7a	1492	162029	2	3
Q3TDX2	Putative uncharacterized protein	Vps4a	437	48835	9	2
P54320	Elastin (Tropoelastin)	Eln	860	71938	24	4
Q8BJY1	26S proteasome non-ATPase regulatory subunit 5 (26S protease subunit S5 basic) (26S proteasome subunit S5B)	Psmd5 Kiaa0072	504	55972	31	5
G5E8U2	MCG121902 (Zinc finger protein 827)	Zfp827 mCG_121902	1074	118092	2	2
P16125	L-lactate dehydrogenase B chain (LDH-B) (EC 1.1.1.27) (LDH heart subunit) (LDH-H)	Ldhb Ldh-2 Ldh2	334	36572	24	5
E9PUN5	Tyrosine-protein kinase transmembrane receptor ROR2	Ror2	932	103728	6	3
Q6ZQH8	Nucleoporin NUP188 homolog	Nup188 Kiaa0169	1759	196694	2	2
P52293	Importin subunit alpha-1 (Importin alpha P1) (Karyopherin subunit alpha-2) (Pendulin) (Pore targeting complex 58 kDa subunit) (PTAC58) (RAG cohort protein 1) (SRP1-alpha)	Kpna2 Rch1	529	57928	16	3
Q924Z6-2	Exportin-6 (Exp6) (Ran-binding protein 20)	Xpo6 Ranbp20	1125	128535	5	2
Q6A051	Attractin-like protein 1	Atrnl1 Alp Atrnl Kiaa0534	1378	152467	1	1
Q76KF0-2	Semaphorin-6D	Sema6d Kiaa1479	1073	113327	3	2
A2APT9	Kelch domain-containing protein 7A	Klhdc7a	773	83590	8	2
Q3TN42	Putative uncharacterized protein	Utp15	528	59418	8	3
Q80TU6	MKIAA0670 protein (Fragment)	Acin1 mKIAA0670	1266	142853	4	3
H7BX46	Rho GTPase-activating protein 39	Arhgap39	1078	121679	3	2
A2AS70	Protein AF-10	Mllt10	990	104528	3	2
Q5QNR3	Protein Ankrd36 (Fragment)	Ankrd36	1261	140548	6	5
B1ATB3	Transmembrane channel-like protein	Tmc6 mCG_19294	810	90576	19	7
Q3UMM1	Tubulin beta-6 chain (Tubulin, beta 6)	Tubb6 mCG_10510	447	50090	31	4
E2RUG8	TRP receptor like protein	Trpv3 VRL3	791	90744	11	3
X2FV61	Sox5-BLM isoform	Sox5	728	80125	6	1
E9Q4D1	Protein Adamts17	Adamts17	1122	124172	5	4
Q810A1	Zinc finger protein 18 (Zinc finger protein 535) (Zinc finger protein with KRAB and SCAN domains 6)	Znf18 Zfp535 Zkscan6	556	62929	10	2
E9QKH8	Catenin delta-2	Ctnnd2	1246	134942	6	3
Q8BGF7-3	PAB-dependent poly(A)-specific ribonuclease subunit PAN2 (EC 3.1.13.4) (Inactive ubiquitin carboxyl-terminal hydrolase 52) (PAB1P-dependent poly(A)-nuclease) (PAN deadenylation complex catalytic subunit 2)	Pan2 Kiaa0710 Usp52	1200	132428	5	2
Q2I0J7	VWF	Vwf	2813	309100	7	6
Q5SVR0	TBC1 domain family member 9B	Tbc1d9b Kiaa0676	1263	141779	4	1
Q3UHK0	Putative uncharacterized protein (Fragment)	6330403L08Rik	319	32468	24	3
E9Q1S3	Protein transport protein Sec23A	Sec23a	736	82956	6	2
A2A9S2	ELAV-like protein	Elavl4	366	40376	9	1
Q8CFS2	Ddx10 protein (Fragment)	Ddx10	681	77877	14	4
Q68FD9	UPF0606 protein KIAA1549	Kiaa1549	1940	209219	2	2
Q3TRF3	Putative uncharacterized protein	Mettl13	478	54237	8	1
E9Q6P4	Protein Tubgcp6	Tubgcp6	1761	196207	2	2
J3QMG7	Adhesion G protein-coupled receptor A2	Adgra2	1121	120332	3	2
Q3UGG9	Putative uncharacterized protein	Mnt	591	63244	8	2
F6QBN8	Protein Lrrc74a	Lrrc74a Gm6772	487	54178	10	3
Q9D172	ES1 protein homolog, mitochondrial	D10Jhu81e	266	28090	9	1
Q61571	Filaggrin (Fragment)		250	26479	39	1
Q6RHW0	Keratin, type I cytoskeletal 9 (Cytokeratin-9) (CK-9) (Keratin-9) (K9)	Krt9 K9 Krt1-9	743	72495	11	4
E9Q2Y4	T-lymphoma invasion and metastasis-inducing protein 1	Tiam1	779	87479	10	4
A6PW28	Likely orthologue of H. sapiens chromosome 6 open reading frame 32 (C6orf32) (Protein FAM65B) (RIKEN cDNA 6330500D04, isoform CRA_h)	Fam65b 6330500D04Rik RP23-461O24.1 mCG_145700	1053	116338	14	10
Q9WV02	RNA-binding motif protein, X chromosome (Heterogeneous nuclear ribonucleoprotein G) (hnRNP G) [Cleaved into: RNA-binding motif protein, X chromosome, N-terminally processed]	Rbmx Hnrnpg Hnrpg Rbmxp1 Rbmxrt	391	42301	11	3
E9PZF4	Nebulin-related-anchoring protein	Nrap	1692	191883	9	9
Q9EQJ9	Membrane-associated guanylate kinase, WW and PDZ domain-containing protein 3 (Membrane-associated guanylate kinase inverted 3) (MAGI-3)	Magi3 Kiaa1634	1476	161671	6	5
E9PY90	cTAGE family member 5	Ctage5	772	86730	12	7
Q8BVL3	Sorting nexin-17	Snx17	470	52797	13	3
Q5DTH5	Teashirt homolog 1 (Serologically defined colon cancer antigen 3 homolog)	Tshz1 Kiaa4206 Sdccag33 Tsh1	1084	118567	5	3
Q2T9K9	LOC677563 protein	LOC677563	482	52159	6	2
Q3UMU9-2	Hepatoma-derived growth factor-related protein 2 (HRP-2)	Hdgfrp2	669	74076	7	3
Q3UG51	Putative uncharacterized protein (Fragment)	Lrrc29	495	52958	12	3
A2A9L3	Serine/threonine-protein kinase PDIK1L	Pdik1l	417	46486	14	2
Q9JI57	General transcription factor II-I repeat domain-containing protein 1 (GTF2I repeat domain-containing protein 1) (Binding factor for early enhancer)	Gtf2ird1 Ben	1104	123483	7	3
B2RXX0	Nek1 protein	Nek1	1275	144269	10	3
Q8R2Y2	Cell surface glycoprotein MUC18 (Gicerin) (Melanoma cell adhesion molecule) (Melanoma-associated antigen MUC18) (CD antigen CD146)	Mcam Muc18	648	71546	4	1
Q80TH7	MKIAA1209 protein (Fragment)	Plekhg1 mKIAA1209	1220	137058	6	3
E9Q425	Tubulin polyglutamylase TTLL5	Ttll5	1295	144415	7	4
Q8BLY7	Hermansky-Pudlak syndrome 6 protein homolog (Ruby-eye protein) (Ru)	Hps6 Ru	805	87341	11	3
A7YTZ6	Ccdc63 protein (Fragment)	Ccdc63	576	66519	10	3
Q6A0D4	Raftlin (Raft-linking protein)	Rftn1 Kiaa0084	554	61537	3	1
J3QJU0	Fc receptor-like protein 5	Fcrl5	596	66768	13	3
B2RQE8	Rho GTPase-activating protein 42 (Rho-type GTPase-activating protein 42)	Arhgap42 Graf3	841	94636	8	4
Q8VDK4	Cadherin 13	Cdh13	714	78117	7	3
F8VPL2	Phosphatidylinositol 4-phosphate 3-kinase C2 domain-containing subunit alpha	Pik3c2a	1686	190743	5	4
A2AFR3	FERM and PDZ domain-containing protein 4 (PDZ domain-containing protein 10) (PSD-95-interacting regulator of spine morphogenesis) (Preso)	Frmpd4 Gm196 Kiaa0316 Pdzd10 Pdzk10	1320	144978	25	11
Q6NZC7	SEC23-interacting protein	Sec23ip	998	110780	7	5
Q9WUM5	Succinyl-CoA ligase [ADP/GDP-forming] subunit alpha, mitochondrial (EC 6.2.1.4) (EC 6.2.1.5) (Succinyl-CoA synthetase subunit alpha) (SCS-alpha)	Suclg1	346	36155	40	6
Q61245	Collagen alpha-1(XI) chain	Col11a1	1804	181031	5	3
A0A0R4J1H8	Protein Shroom3	Shroom3	1805	195427	7	6
A2AS98	Nck-associated protein 1	Nckap1	1134	129511	7	3
O55098	Serine/threonine-protein kinase 10 (EC 2.7.11.1) (Lymphocyte-oriented kinase)	Stk10 Lok	966	111906	6	2
A2VDF7	Anion exchange protein (Fragment)	Slc4a4	1057	118785	4	3
Q5FW75	Actinin alpha 2	Actn2	894	103919	57	3
G3UWC8	Otogelin	Otog mCG_142479	2911	313618	6	6
B2RU85	Potassium voltage-gated channel subfamily H member 3 (Potassium voltage-gated channel, subfamily H (Eag-related), member 3) (Potassium voltage-gated channel, subfamily H (Eag-related), member 3, isoform CRA_a)	Kcnh3 mCG_18387	1095	118244	11	6
A0A0R4J0I1	MCG1051009 (Serine protease inhibitor A3K)	Serpina3k mCG_1051009	418	46673	45	3
B1B0C7	Basement membrane-specific heparan sulfate proteoglycan core protein	Hspg2	4375	469027	27	1
Q9D6U7	Putative uncharacterized protein	Ckm	381	43031	41	7
H7BX15	Adhesion G protein-coupled receptor L1	Adgrl1 Lphn1	1471	162283	7	3
Q8CE30	Putative uncharacterized protein	Ncl	707	76712	9	3
Q6PCM2-2	Integrator complex subunit 6 (Int6) (DBI-1) (Protein DDX26)	Ints6 Dbi1 Ddx26	883	98635	8	2
A2A7B5	Protein Prdm2	Prdm2	1709	187202	7	6
Q05C26	Thsd1 protein (Fragment)	Thsd1	335	37811	14	2
Q3TFG3	Putative uncharacterized protein	Eif4a1	406	46182	27	3
D3Y2F8	Cyclin-like protein 4	Cnnm4	644	73252	2	1
D3YTQ3	Heterogeneous nuclear ribonucleoprotein D-like	Hnrnpdl Hnrnpdl1 Hnrpdl	420	46270	14	1
Q99MR8	Methylcrotonoyl-CoA carboxylase subunit alpha, mitochondrial (MCCase subunit alpha) (EC 6.4.1.4) (3-methylcrotonyl-CoA carboxylase 1) (3-methylcrotonyl-CoA carboxylase biotin-containing subunit) (3-methylcrotonyl-CoA:carbon dioxide ligase subunit alpha)	Mccc1 Mcca	717	79344	7	2
D3Z656	Synaptojanin-1	Synj1	1607	176331	9	5
Q543F6	Cyclin-dependent kinase 5, isoform CRA_c (Cyclin-dependent-like kinase 5)	Cdk5 mCG_16479	292	33288	7	1
Q3TSV3	Putative uncharacterized protein (Fragment)	Clspn	257	29433	19	2
Q62431	AT-rich interactive domain-containing protein 3A (ARID domain-containing protein 3A) (B-cell regulator of IgH transcription) (Bright) (Dead ringer-like protein 1)	Arid3a Dri1 Dril1	601	64173	6	1
Q6ZQ77	MKIAA0655 protein (Fragment)	Hip1r mKIAA0655	1083	120992	20	6
Q9CUU3	Synaptonemal complex protein 2 (SCP-2) (Synaptonemal complex lateral element protein)	Sycp2 Scp2	1500	172122	3	3
E9PWW9	Protein Rsf1	Rsf1	1441	161750	9	4
B7ZCC9	Adhesion G-protein coupled receptor G4 (G-protein coupled receptor 112)	Adgrg4 Gpr112	3073	334211	5	7
Q80VW7-2	AT-hook-containing transcription factor	Akna Kiaa1968	1404	57936	7	1
J3QK54	Protein Fignl2	Fignl2	644	65922	10	2
A0A140T8T7	Collagen alpha-5(VI) chain	Col6a5	2640	289514	8	9
Q3UZ47	Putative uncharacterized protein	Tjp3	904	99070	5	2
Q9Z1Z0	General vesicular transport factor p115 (Protein USO1 homolog) (Transcytosis-associated protein) (TAP) (Vesicle-docking protein)	Uso1 Vdp	959	106983	3	2
Q64730	Leucocyte common antigen (L-CA) (Fragment)		1343	150680	4	2
B1AVN8	Phosphatase and actin regulator	Phactr2	630	68911	4	3
Q61139	Proprotein convertase subtilisin/kexin type 7 (EC 3.4.21.-) (Prohormone convertase 7) (Proprotein convertase 7) (PC7) (Subtilisin-like proprotein convertase 7) (SPC7) (Subtilisin/kexin-like protease PC7)	Pcsk7 Pc7	770	84358	8	2
B9EHK5	Submandibular gland protein C	Smgc	733	74382	8	3
O08532	Voltage-dependent calcium channel subunit alpha-2/delta-1 (Voltage-gated calcium channel subunit alpha-2/delta-1) [Cleaved into: Voltage-dependent calcium channel subunit alpha-2-1; Voltage-dependent calcium channel subunit delta-1]	Cacna2d1 Cacna2	1103	124630	5	4
G3UYX5	Regulator of G-protein signaling 22	Rgs22	1258	145883	6	4
E9PUA0	RNA-binding protein MEX3D	Mex3d	718	72313	6	1
Q9Z263	Major sperm fibrous sheath protein Pro-mAKAP82		839	92583	9	4
Q3UIM5	Putative uncharacterized protein	Cpt1b	772	88168	5	3
G3UZC7	Protein Gm9268	Gm9268	854	97536	2	1
Q3TB96	Putative uncharacterized protein	Dctn1	1239	136812	12	6
Z4YKQ9	ATPase family AAA domain-containing protein 5	Atad5	1823	203624	17	10
Q8K0T4	Katanin p60 ATPase-containing subunit A-like 1 (Katanin p60 subunit A-like 1) (EC 3.6.4.3) (p60 katanin-like 1)	Katnal1	488	55165	16	4
Q5SNZ0-3	Girdin (Akt phosphorylation enhancer) (APE) (Coiled-coil domain-containing protein 88A) (G alpha-interacting vesicle-associated protein) (GIV) (Girders of actin filament) (Hook-related protein 1) (HkRP1)	Ccdc88a Grdn Kiaa1212	1873	205969	5	3
A2AX52	Collagen alpha-4(VI) chain	Col6a4 Dvwa	2309	250795	5	6
Q5QNV8	Protein HEATR9 (HEAT repeat-containing protein 9)	Heatr9 Gm11435	569	65861	12	3
A0A087WP74	Protein 2810474O19Rik	2810474O19Rik	1519	168858	5	3
Q8CH64	BIRC1F protein	Naip6 Birc1f	1403	159858	5	3
Q8BVE8	Histone-lysine N-methyltransferase NSD2 (EC 2.1.1.43) (Multiple myeloma SET domain-containing protein) (MMSET) (Nuclear SET domain-containing protein 2) (NSD2) (Wolf-Hirschhorn syndrome candidate 1 protein homolog) (WHSC1)	Whsc1 Kiaa1090 Nsd2	1365	152253	7	2
Q3U4J9	Putative uncharacterized protein	Cdk6	326	36959	47	6
Q3U0V5	Putative uncharacterized protein	Ulk1	1051	112480	7	3
P28666	Murinoglobulin-2 (MuG2)	Mug2 Mug-2	1451	162381	5	3
E9PUQ8	Diacylglycerol kinase (DAG kinase) (EC 2.7.1.107)	Dgkd	1220	135208	8	7
Q80UK8-2	Integrator complex subunit 2 (Int2)	Ints2 Kiaa1287	1198	44026	5	1
Q9Z0I9	Collagen alpha3(VI) (Fragment)	Col6a3	1703	185782	42	1
Q8CEA3	Putative uncharacterized protein	Zfp60	704	81840	19	6
A0A0G2JFB2	Tudor and KH domain-containing protein	Tdrkh	556	61608	9	2
A0A0R4J0V3	Phosphatidate phosphatase LPIN1	Lpin1	924	102042	7	3
Q2TBA3	Mucosa-associated lymphoid tissue lymphoma translocation protein 1 homolog (EC 3.4.22.-) (Paracaspase)	Malt1	832	93216	3	1
Q9R1X4-6	Protein timeless homolog (mTim)	Timeless Tim1 Timeless1	1197	137432	5	3
A2A9Q2	Nardilysin	Nrd1	1229	140620	7	5
Q8BRF5	Putative uncharacterized protein		171	18870	6	1
Q91XC0	LIM domain-containing protein ajuba	Ajuba Jub	547	57920	7	3
Q9D051	Pyruvate dehydrogenase E1 component subunit beta, mitochondrial (PDHE1-B) (EC 1.2.4.1)	Pdhb	359	38937	25	4
Q8BWE0	Putative uncharacterized protein (Fragment)	Card6	1157	129405	11	6
Q8CE90-7	Dual specificity mitogen-activated protein kinase kinase 7 (MAP kinase kinase 7) (MAPKK 7) (EC 2.7.12.2) (JNK-activating kinase 2) (MAPK/ERK kinase 7) (MEK 7) (c-Jun N-terminal kinase kinase 2) (JNK kinase 2) (JNKK 2)	Map2k7 Mkk7	535	52497	7	1
Q3V2Y1	Putative uncharacterized protein (Fragment)	Foxn4	448	48085	7	3
Q3TAN4	Putative uncharacterized protein	Cog2	731	82068	8	4
Q5DU05	Centrosomal protein of 164 kDa (Cep164)	Cep164 Kiaa1052	1446	162600	6	3
E9Q5Z5	Fanconi anemia group F protein (Protein FACF)	Fancf	343	38224	10	1
P42859	Huntingtin (Huntington disease protein homolog) (HD protein homolog)	Htt Hd Hdh	3119	344689	8	9
Q60902-3	Epidermal growth factor receptor substrate 15-like 1 (Epidermal growth factor receptor pathway substrate 15-related sequence) (Eps15-rs) (Eps15-related protein) (Eps15R)	Eps15l1 Eps15-rs Eps15R	907	75878	10	2
K3W4R8	Serine/threonine-protein kinase Nek10	Nek10	1115	126687	11	5
Q3TE45	Succinate dehydrogenase [ubiquinone] iron-sulfur subunit, mitochondrial (EC 1.3.5.1)	Sdhb	282	31818	44	5
B1AR10	Protein Mllt6	Mllt6	1109	113261	4	1
G3X9J0	Signal-induced proliferation-associated 1-like protein 3 (SIPA1-like protein 3) (SPA-1-like protein 3)	Sipa1l3 Spal3	1776	195062	4	2
P27546-4	Microtubule-associated protein 4 (MAP-4)	Map4 Mtap4	1125	94517	6	1
Q0X0F1	Serase-1B	Tmprss9 serase-1B	620	66864	11	4
E9QAD8	IQ motif and SEC7 domain-containing protein 2	Iqsec2	1488	162833	9	6
Q99N50-3	Synaptotagmin-like protein 2 (Exophilin-4)	Sytl2 Slp2	950	103797	10	7
A0A140LJJ5	Protein Akap13	Akap13	2794	306005	10	9
Q3UHI8	Putative uncharacterized protein	Akap6	2307	254263	3	4
A2AHQ7	Phosphorylase b kinase regulatory subunit alpha, liver isoform	Phka2	1191	133807	7	4
O09053	Werner syndrome ATP-dependent helicase homolog (EC 3.6.4.12) (Exonuclease WRN) (EC 3.1.-.-)	Wrn	1401	157203	5	3
Q99MQ1-2	Protein bicaudal C homolog 1 (Bic-C)	Bicc1	977	93406	8	2
Q8K205	Blood vessel epicardial substance (Processing of 1, ribonuclease P/MRP family, (S. cerevisiae))	Pop1	1045	117367	3	1
E5FYH1	Testis- and ovary-specific PAZ domain-containing protein 1	Topaz1 Gm9524	1653	185486	5	3
Q3U393	Putative uncharacterized protein	Exoc3l4 1200009I06Rik	352	39124	8	1
D7F2B6	Retinoic acid early transcript 1E (Retinoic acid early-inducible protein 1-epsilon)	Raet1e	251	28284	7	1
Q5SV64	Myosin-10	Myh10	2007	232470	10	6
Q8VE19	WD repeat-containing protein mio	Mios	875	98335	4	2
Q8BIT7	Putative uncharacterized protein	Exoc3 Sec6l1	755	86439	5	2
Q8K010	5-oxoprolinase (EC 3.5.2.9) (5-oxo-L-prolinase) (5-OPase) (Pyroglutamase)	Oplah	1288	137611	5	3
D3Z3R4	Protein polybromo-1 (Fragment)	Pbrm1	931	107742	13	5
Q3U0N4	Putative uncharacterized protein	Taf1c	836	91965	7	3
G3UYF8	Homeobox protein unc-4 homolog	Uncx	530	53936	7	2
Q7TNL7	Dual specificity phosphatase 9 (Dual specificity phosphatase 9, isoform CRA_a) (Dual-specificity MAP kinase phosphatase-4) (Protein Dusp9)	Dusp9 mCG_3242	452	48658	6	1
B9EKC5	Calcineurin binding protein 1	Cabin1	2187	243215	8	6
Q3UNQ6	Putative uncharacterized protein	Epb41l2 Epb4.1l2	988	109997	11	3
O35954	Membrane-associated phosphatidylinositol transfer protein 1 (Drosophila retinal degeneration B homolog 1) (RdgB1) (Mpt-1) (Phosphatidylinositol transfer protein, membrane-associated 1) (PITPnm 1) (Pyk2 N-terminal domain-interacting receptor 2) (NIR-2)	Pitpnm1 Dres9 Mpt1 Nir2 Pitpnm	1243	134940	2	1
O88477	Insulin-like growth factor 2 mRNA-binding protein 1 (IGF2 mRNA-binding protein 1) (IMP-1) (Coding region determinant-binding protein) (CRD-BP) (IGF-II mRNA-binding protein 1) (VICKZ family member 1) (Zipcode-binding protein 1) (ZBP-1)	Igf2bp1 Vickz1	577	63451	11	4
Q9Z2U2	Zinc finger protein 292 (Zinc finger protein 15) (Zfp-15)	Zfp292 Zfp15	2698	301047	4	4
Q3TM37	Putative uncharacterized protein (Fragment)	Snw1	313	35290	18	3
Q3UPF5	Zinc finger CCCH-type antiviral protein 1 (ADP-ribosyltransferase diphtheria toxin-like 13) (ARTD13)	Zc3hav1	946	106687	7	4
B2RXS2	Fam179b protein	Fam179b	1776	194847	10	7
Q99K74-3	Mediator of RNA polymerase II transcription subunit 24 (Mediator complex subunit 24) (Thyroid hormone receptor-associated protein 4) (Thyroid hormone receptor-associated protein complex 100 kDa component) (Trap100) (mTRAP100)	Med24 D11Ertd307e Thrap4 Trap100	987	83879	9	4
E9PX29	Protein Sptbn4	Sptbn4 Spnb4	2561	288822	8	7
Q8VEE2	Rad52 protein	Rad52	427	47498	11	3
A0A0A0MQ98	Probable JmjC domain-containing histone demethylation protein 2C	Jmjd1c	2530	281535	9	10
Q3UHQ6	Protein dopey-2	Dopey2 Kiaa0933	2295	257481	4	4
F6ZBY9	Transducin-like enhancer protein 4	Tle4	773	83753	8	3
B2RPZ5	Hectd2 protein (Probable E3 ubiquitin-protein ligase HECTD2)	Hectd2	775	87860	5	2
E9Q8I9	Protein furry homolog	Fry Kiaa4143	3020	339093	13	14
A0A0A0MQM7	Matrilin-2	Matn2	957	106861	7	2
Q3UPH7-3	Rho guanine nucleotide exchange factor 40 (Protein SOLO)	Arhgef40 Solo	1517	160172	6	4
Q8C883	Putative uncharacterized protein	Pcdh12	998	109374	2	1
Q2VLH6	Scavenger receptor cysteine-rich type 1 protein M130 (CD antigen CD163) [Cleaved into: Soluble CD163 (sCD163)]	Cd163 M130	1121	120921	8	8
G3UVV4	Hexokinase 1, isoform CRA_f (Hexokinase-1)	Hk1 mCG_127656	917	101873	8	4
Q8K1X1	WD repeat-containing protein 11 (Bromodomain and WD repeat-containing protein 2)	Wdr11 Brwd2 Kiaa1351	1223	135937	6	5
Q8CGC6	RNA-binding protein 28 (RNA-binding motif protein 28)	Rbm28	750	84214	10	3
Q3UIQ5	Putative uncharacterized protein	Dhcr7	471	53861	4	1
Q80YX1	Tenascin (TN) (Hexabrachion) (Tenascin-C) (TN-C)	Tnc Hxb	2110	231805	11	12
A0A0U1RNK7	Dedicator of cytokinesis protein 7	Dock7	2098	238094	6	5
Q3TIC8	Putative uncharacterized protein	Uqcrc1	480	52753	43	8
P00520	Tyrosine-protein kinase ABL1 (EC 2.7.10.2) (Abelson murine leukemia viral oncogene homolog 1) (Abelson tyrosine-protein kinase 1) (Proto-oncogene c-Abl) (p150)	Abl1 Abl	1123	122672	14	6
A2A7S8-4	Uncharacterized protein KIAA1522	Kiaa1522	1013	106209	8	5
A0A0A0MQ83	Multiple epidermal growth factor-like domains protein 6	Megf6	1572	164776	5	3
A0A0G2JEP7	Enamelin (Enamelin, isoform CRA_c)	Enam mCG_21592	1349	149645	5	3
E9Q6G4	ATP-binding cassette sub-family A member 7	Abca7	2167	237746	7	6
A0A0A0MQA5	Tubulin alpha-4A chain (Fragment)	Tuba4a	477	52912	25	4
Q8C7X2-2	ER membrane protein complex subunit 1	Emc1 Kiaa0090	997	111293	4	2
P21271-3	Unconventional myosin-Vb	Myo5b Kiaa1119	1818	213436	14	11
Q04447	Creatine kinase B-type (EC 2.7.3.2) (B-CK) (Creatine kinase B chain)	Ckb Ckbb	381	42713	23	4
Q3U0L5	Serine/threonine-protein kinase PLK (EC 2.7.11.21) (Polo-like kinase)	Plk3	648	71824	21	6
Q5SV54	Ortholog of human amyotrophic lateral sclerosis 2 (Juvenile) chromosome region, candidate 19 (ALS2CR19) (Partitioning defective 3 homolog B)	Pard3b Als2cr19 RP23-20G7.1 RP23-20G7.1-003	1104	121781	11	8
Q61789	Laminin subunit alpha-3 (Epiligrin subunit alpha) (Kalinin subunit alpha) (Laminin-5 subunit alpha) (Laminin-6 subunit alpha) (Laminin-7 subunit alpha) (Nicein subunit alpha)	Lama3	3330	366228	5	6
Q922F6	Putative uncharacterized protein (Fragment)		491	56940	29	8
Q8K3R3	1-phosphatidylinositol 4,5-bisphosphate phosphodiesterase delta-4 (EC 3.1.4.11) (Phosphoinositide phospholipase C-delta-4) (Phospholipase C-delta-4) (PLC-delta-4)	Plcd4 Plcd	807	92694	4	2
E9PYM7	Alpha-mannosidase (EC 3.2.1.-) (Fragment)	Man2c1	866	96423	7	3
P05202	Aspartate aminotransferase, mitochondrial (mAspAT) (EC 2.6.1.1) (EC 2.6.1.7) (Fatty acid-binding protein) (FABP-1) (Glutamate oxaloacetate transaminase 2) (Kynurenine aminotransferase 4) (Kynurenine aminotransferase IV) (Kynurenine--oxoglutarate transaminase 4) (Kynurenine--oxoglutarate transaminase IV) (Plasma membrane-associated fatty acid-binding protein) (FABPpm) (Transaminase A)	Got2 Got-2	430	47411	33	8
Q8VG59	Olfactory receptor	Olfr1238 mCG_59060	315	35044	5	1
Q9D5T2	MCG15536 (Protein 4921524L21Rik)	4921524L21Rik mCG_15536	438	49771	8	1
Q3TBA3	Antigen peptide transporter 1	Tap1	696	75959	6	4
D3Z4E0	L-amino-acid oxidase	Il4i1	638	71142	6	2
B8JJZ7	Protein Zfp81	Zfp81	531	61992	13	3
Q80T79	CUB and sushi domain-containing protein 3 (CUB and sushi multiple domains protein 3)	Csmd3 Kiaa1894	3707	405764	2	3
Q8BXJ2-2	Transcriptional-regulating factor 1 (Transcriptional-regulating protein 132) (Zinc finger transcription factor TReP-132)	Trerf1	1205	134425	3	2
A2AP58	Protein Sptbn5 (Fragment)	Sptbn5 Spnb5	1131	130278	12	8
Q27YN9	T-type calcium channel alpha 1G subunit	Cacna1g	2265	250726	4	5
Q3T9D8	Putative uncharacterized protein (Fragment)	Slc25a32 Mftc	269	29839	14	2
P70392	Ras-specific guanine nucleotide-releasing factor 2 (Ras-GRF2) (Ras guanine nucleotide exchange factor 2)	Rasgrf2 Grf2	1189	135667	13	8
B9EJV3	GREB1-like protein	Greb1l Kiaa4095	1913	213626	2	2
Q8C3J5	Dedicator of cytokinesis protein 2 (Protein Hch)	Dock2	1828	211702	6	5
E9Q4G9	Protein Gm21293	Gm21293	266	30157	15	3
Q5SXE4	Kinase suppressor of Ras 1	Ksr1	637	69864	6	2
Q8BKW5	Putative uncharacterized protein (Fragment)	Scaper Zfp291	864	98615	4	2
Q2TAW4	Myosin, heavy polypeptide 6, cardiac muscle, alpha	Myh6	1938	223562	67	2
H3BJB2	Protein phosphatase 1 regulatory subunit 3E	Ppp1r3e	279	30615	20	3
M0QWP1	Agrin	Agrn	2034	216647	9	9
D3YZU4	SH3 and multiple ankyrin repeat domains protein 1	Shank1	2159	225347	10	8
A0A140LJF0	Mitogen activated protein kinase kinase kinase kinase 1, isoform CRA_a (Mitogen-activated protein kinase kinase kinase kinase 1)	Map4k1 mCG_2984	641	71169	9	3
Q922A2	Annexin	Anxa7	463	49909	9	2
E9PZJ8	Activating signal cointegrator 1 complex subunit 3 (EC 3.6.4.12)	Ascc3	2198	250555	5	4
E9PZ26	Protein Brd1	Brd1	1189	133372	17	4
Q8CGW4	Transcription factor SOX-30	Sox30	782	83938	7	2
Q7TPS8	Oog4 protein (Fragment)	Oog4	513	58386	13	4
Q9D6J6	NADH dehydrogenase [ubiquinone] flavoprotein 2, mitochondrial (EC 1.6.5.3) (EC 1.6.99.3) (NADH-ubiquinone oxidoreductase 24 kDa subunit)	Ndufv2	248	27285	43	4
E9Q3Y7	Protein C530008M17Rik	C530008M17Rik	1288	142544	9	7
D3YXG0	Protein Hmcn1	Hmcn1	5634	611568	4	13
A2BIE1	Protein Qser1	Qser1	1698	185378	6	7
E9Q166	Protein Atad2b	Atad2b	1460	164723	9	4
B7ZNW9	Slit2 protein	Slit2	1525	169268	4	2
Q8BWV2	Putative uncharacterized protein	Vps16	839	94800	12	4
Q148W0	Phospholipid-transporting ATPase IC (EC 3.6.3.1) (ATPase class I type 8B member 1) (P4-ATPase flippase complex alpha subunit ATP8B1)	Atp8b1	1251	143797	4	2
Q8VDD9	PH-interacting protein (PHIP) (IRS-1 PH domain-binding protein) (Neuronal differentiation-related protein) (NDRP) (WD repeat-containing protein 11)	Phip Ndrp Phip1 Wdr11	1821	206725	15	9
A0A0R5RP23	Sodium channel protein	Scn3a	1950	221221	3	2
H3BKF3	PAB-dependent poly(A)-specific ribonuclease subunit PAN3 (PAB1P-dependent poly(A)-nuclease) (PAN deadenylation complex subunit 3)	Pan3	887	95451	3	2
D3Z4J3	Unconventional myosin-Va	Myo5a	1855	215523	9	5
Q8CG72	Poly(ADP-ribose) glycohydrolase ARH3 (EC 3.2.1.143) (ADP-ribosylhydrolase 3) ([Protein ADP-ribosylarginine] hydrolase-like protein 2)	Adprhl2 Arh3	370	39414	24	3
A0A0R4J1U7	RAS protein activator-like-3	Rasal3	601	66264	18	5
Q6P4T2	U5 small nuclear ribonucleoprotein 200 kDa helicase (EC 3.6.4.13) (BRR2 homolog) (U5 snRNP-specific 200 kDa protein) (U5-200KD)	Snrnp200 Kiaa0788	2136	244544	8	7
P51125-2	Calpastatin (Calpain inhibitor)	Cast	788	82736	19	9
Q0P5V2	Sine oculis-binding protein homolog (Jackson circler protein 1)	Sobp Jxc1	864	91784	3	2
Q05860-4	Formin-1 (Limb deformity protein)	Fmn1 Fmn Ld	1466	68996	11	3
Q9Z148	Histone-lysine N-methyltransferase EHMT2 (EC 2.1.1.-) (EC 2.1.1.43) (Euchromatic histone-lysine N-methyltransferase 2) (HLA-B-associated transcript 8) (Histone H3-K9 methyltransferase 3) (H3-K9-HMTase 3) (Protein G9a)	Ehmt2 Bat8 G9a Ng36	1263	138039	8	6
P14602	Heat shock protein beta-1 (HspB1) (Growth-related 25 kDa protein) (Heat shock 25 kDa protein) (HSP 25) (Heat shock 27 kDa protein) (HSP 27) (p25)	Hspb1 Hsp25 Hsp27	209	23014	19	3
Q3U4K6	Putative uncharacterized protein	Ick	629	70610	10	4
O09000	Nuclear receptor coactivator 3 (NCoA-3) (EC 2.3.1.48) (Amplified in breast cancer-1 protein homolog) (AIB-1) (CBP-interacting protein) (p/CIP) (pCIP) (Receptor-associated coactivator 3) (RAC-3) (Steroid receptor coactivator protein 3) (SRC-3) (Thyroid hormone receptor activator molecule 1) (ACTR) (TRAM-1)	Ncoa3 Aib1 Pcip Rac3 Tram1	1398	151573	15	9
Q96DY5-2	RING finger protein 112 (Brain finger protein) (Zinc finger protein 179)	Rnf112 Bfp Znf179	654	68778	2	1
Q9CUM4	Putative uncharacterized protein (Fragment)	Dnm2	493	56552	13	5
B9EHV2	Spata13 protein	Spata13	1149	128100	3	2
Q14B66	Kcnq3 protein	Kcnq3	870	96597	16	5
Q9ERC8	Down syndrome cell adhesion molecule homolog	Dscam	2013	222267	4	4
Q6P1E8	EF-hand calcium-binding domain-containing protein 6 (DJ-1-binding protein) (DJBP)	Efcab6 Djbp Kiaa1672	1516	175770	5	4
Q9CPQ9	Fructose-bisphosphate aldolase (EC 4.1.2.13)	Aldoart1	364	39285	33	4
Q4VAA2	Protein CDV3 (Carnitine deficiency-associated protein 3) (Tyrosine-phosphorylated protein 36) (TPP36)	Cdv3	281	29729	14	1
H7BX82	TBC1 domain family member 4 (Fragment)	Tbc1d4	839	92740	7	4
Q4QQP3	Protein Zfp729a (Uncharacterized protein)	Zfp729a A530054K11Rik	973	111481	6	2
B9EKK3	IQ motif containing GTPase activating protein 2	Iqgap2	1575	180550	10	7
Q8CD92	Tetratricopeptide repeat protein 27 (TPR repeat protein 27)	Ttc27	847	96431	5	2
Q80TA9	Ectopic P granules protein 5 homolog	Epg5 Kiaa1632	2572	290799	4	5
G3X9M3	Protein Hmgxb3 (RIKEN cDNA A630042L21, isoform CRA_a)	Hmgxb3 A630042L21Rik mCG_130312	1254	137275	18	11
B2RY03	Synaptopodin 2	Synpo2	1257	135741	7	4
Q6PDQ2	Chromodomain-helicase-DNA-binding protein 4 (CHD-4) (EC 3.6.4.12)	Chd4	1915	217749	9	6
E9QK48	Echinoderm microtubule-associated protein-like 2	Eml2	841	90792	4	1
B0V2W5	Protein Zfp472	Zfp472	534	62187	11	3
Q5XK21	Trps1 protein (Fragment)	Trps1	1013	112325	9	5
Q61324	Aryl hydrocarbon receptor nuclear translocator 2 (ARNT protein 2)	Arnt2 Kiaa0307	712	77902	6	1
Q3TMW1	Coiled-coil domain-containing protein 102A	Ccdc102a	549	62624	9	2
Q8JZZ7	Adhesion G protein-coupled receptor L2 (Calcium-independent alpha-latrotoxin receptor 2) (CIRL-2) (Latrophilin-2)	Adgrl2 Kiaa0786 Lphn2	1487	166577	3	2
Q8C3S2	Transport and Golgi organization protein 6 homolog (Transmembrane and coiled-coil domain-containing protein 7)	Tango6 Kiaa1746 Tmco7	1079	118732	4	2
Q5SGK3	Aldehyde oxidase 2 (EC 1.2.3.1) (Aldehyde oxidase homolog 3) (Azaheterocycle hydroxylase 2) (EC 1.17.3.-)	Aox2 Aoh3 Aox3l1	1345	147913	6	4
B2RQ73	Nin protein	Nin	2035	234798	4	4
Q5H8C4	Vacuolar protein sorting-associated protein 13A (Chorea-acanthocytosis protein homolog) (Chorein)	Vps13a Chac Kiaa0986	3166	359402	4	7
Q80SX8	ATP-dependent DNA helicase PIF1 (EC 3.6.4.12) (DNA repair and recombination helicase PIF1) (Pif1/Rrm3 DNA helicase-like protein)	Pif1	650	70942	17	4
A0A0A0MQD5	SH3 and multiple ankyrin repeat domains protein 3	Shank3	1805	192216	7	6
Q6DLW6	Aryl hydrocarbon receptor (Fragment)	Ahr	429	47395	7	1
Q80U76	MKIAA0112 protein (Fragment)	Rrs1 mKIAA0112	373	42319	13	2
E9Q9D8	Protein Ankrd35	Ankrd35	996	109388	7	3
O88987	A-kinase anchor protein 3 (AKAP-3) (A-kinase anchor protein 110 kDa) (AKAP 110) (Protein kinase A-anchoring protein 3) (PRKA3)	Akap3 Akap110	864	95556	4	2
Q9WTR2	Mitogen-activated protein kinase kinase kinase 6 (EC 2.7.11.25) (Apoptosis signal-regulating kinase 2)	Map3k6 Ask2 Mapkkk6 Mekk6	1291	143054	6	2
Q921G7	Electron transfer flavoprotein-ubiquinone oxidoreductase, mitochondrial (ETF-QO) (ETF-ubiquinone oxidoreductase) (EC 1.5.5.1) (Electron-transferring-flavoprotein dehydrogenase) (ETF dehydrogenase)	Etfdh	616	68091	25	9
B2RX88-2	Centrosome and spindle pole associated protein 1	Cspp1 Cspp	1205	131209	7	4
Q63ZW6	Col4a5 protein (Protein Col4a5)	Col4a5	1691	161807	4	3
Q8BJ34-3	Meiosis arrest female protein 1 (Limkain-b1)	Marf1 Kiaa0430 Lkap	1730	182818	11	5
F6QGP8	Protein Zfp804b	Zfp804b	1307	147634	5	3
Q3UG39	Putative uncharacterized protein	Ulk2	1037	112851	10	4
Q91Z58	Uncharacterized protein C6orf132 homolog		1206	127881	7	5
Q3TZF3	Putative uncharacterized protein	Otoa	1137	126372	3	2
H7BX44	Serine/threonine-protein kinase MRCK alpha	Cdc42bpa	1638	185784	15	9
B2RR82	Itsn2 protein	Itsn2	1685	191734	9	7
Q7TQ48	Sarcalumenin	Srl Sar	910	99184	21	9
I6L963	Myh2 protein	Myh2	1598	183083	61	7
Q62381	Tolloid-like protein 1 (mTll) (EC 3.4.24.-)	Tll1 Tll	1013	114533	4	2
Q64727	Vinculin (Metavinculin)	Vcl	1066	116717	4	3
Q6A065	Centrosomal protein of 170 kDa (Cep170)	Cep170 Kiaa0470	1588	175049	11	11
Q8K284	General transcription factor 3C polypeptide 1 (TF3C-alpha) (TFIIIC box B-binding subunit) (Transcription factor IIIC 220 kDa subunit) (TFIIIC 220 kDa subunit) (TFIIIC220) (Transcription factor IIIC subunit alpha)	Gtf3c1	2101	237474	7	6
A0A087WP42	CLIP-associating protein 1	Clasp1	1492	164357	8	4
B2RUG8	Asxl2 protein	Asxl2	1418	152316	14	8
P05532	Mast/stem cell growth factor receptor Kit (SCFR) (EC 2.7.10.1) (Proto-oncogene c-Kit) (Tyrosine-protein kinase Kit) (CD antigen CD117)	Kit Sl	979	109343	3	1
Q3U452	ATP synthase subunit alpha		509	55277	21	5
E9PVP1	Aurora kinase B	Aim1	1691	184730	3	3
Q9R053	Sodium channel protein type 11 subunit alpha (NaN) (Sensory neuron sodium channel 2) (Sodium channel protein type XI subunit alpha) (Voltage-gated sodium channel subunit alpha Nav1.9)	Scn11a Nan Nat Sns2	1765	201383	5	2
P83741	Serine/threonine-protein kinase WNK1 (EC 2.7.11.1) (Protein kinase lysine-deficient 1) (Protein kinase with no lysine 1)	Wnk1 Hsn2 Prkwnk1	2377	250931	6	6
F6XLV1	Protein Crocc2	Crocc2 E030010N08Rik	1638	186630	8	4
Q6NVA3	Ewing sarcoma breakpoint region 1	Ewsr1	656	68549	6	2
Q69ZK7	Protein FAM214A	Fam214a Kiaa1370	1075	119271	7	2
Q8CGN4	BCL-6 corepressor (BCoR)	Bcor Kiaa1575	1759	192630	4	5
Q80VY9	Putative ATP-dependent RNA helicase DHX33 (EC 3.6.4.13) (DEAH box protein 33)	Dhx33	698	78347	7	2
H7BX94	Lysine-rich nucleolar protein 1	Knop1 2310008H09Rik	532	59680	5	3
Q3LRV6	Chloride channel protein	Clcn4 Clcn4-2	687	76476	12	3
Q9R1V6-7	Disintegrin and metalloproteinase domain-containing protein 22 (ADAM 22)	Adam22	904	99702	12	6
B2RQQ8	Collagen alpha-2(IV) chain (Collagen, type IV, alpha 2) (Procollagen, type IV, alpha 2, isoform CRA_a)	Col4a2 mCG_17319	1707	167324	5	5
Q8C1W2	Galectin	Pick1 Prkcabp	530	58972	5	1
Q99K67	Alpha-aminoadipic semialdehyde synthase, mitochondrial (LKR/SDH) [Includes: Lysine ketoglutarate reductase (LKR) (LOR) (EC 1.5.1.8); Saccharopine dehydrogenase (SDH) (EC 1.5.1.9)]	Aass Lorsdh	926	102975	11	5
E9Q1T9	Exportin-2	Cse1l	915	103889	3	1
K3W4R2	Myosin-14	Myh14	2000	228559	17	12
Q80TB7	Zinc finger SWIM domain-containing protein 6	Zswim6 Kiaa1577	1207	133109	6	4
A0A068BD44	Collagen type XI alpha 2	Col11a2	1715	169248	13	12
Q9Z1N7	AT-rich interactive domain-containing protein 3B (ARID domain-containing protein 3B) (Bright and dead ringer protein) (Bright-like protein)	Arid3b Bdp Dril2	568	61015	18	4
Q7TNP7	Uncharacterized protein	Zfp763 1700065O13Rik	588	68734	8	2
P05201	Aspartate aminotransferase, cytoplasmic (cAspAT) (EC 2.6.1.1) (EC 2.6.1.3) (Cysteine aminotransferase, cytoplasmic) (Cysteine transaminase, cytoplasmic) (cCAT) (Glutamate oxaloacetate transaminase 1) (Transaminase A)	Got1	413	46248	32	9
P11499	Heat shock protein HSP 90-beta (Heat shock 84 kDa) (HSP 84) (HSP84) (Tumor-specific transplantation 84 kDa antigen) (TSTA)	Hsp90ab1 Hsp84 Hsp84-1 Hspcb	724	83281	25	3
Q69ZT0	Phospholipid-transporting ATPase (EC 3.6.3.1) (Fragment)	mKIAA1021	1196	135979	4	2
Q8BIA9	Putative uncharacterized protein	Zfp954	325	35885	8	1
Q3TEZ2	Putative uncharacterized protein	Wdr6	1125	121870	4	2
A2AKY4	Zinc finger protein 804A	Znf804a Zfp804a	1200	134850	4	2
Q9D4I8	MCG53927 (Protein 4931431F19Rik)	4931431F19Rik mCG_53927	510	55319	11	2
Q2MHN3	Protein Zfhx2 (ZFH-5)	Zfhx2 zfh-5	2562	273482	6	5
Q3UJY9	Putative uncharacterized protein (Fragment)	Ash2l	564	63193	8	2
Q78DX7	Proto-oncogene tyrosine-protein kinase ROS (EC 2.7.10.1) (Proto-oncogene c-Ros) (Proto-oncogene c-Ros-1) (Receptor tyrosine kinase c-ros oncogene 1) (c-Ros receptor tyrosine kinase)	Ros1 Ros Ros-1	2340	261965	4	7
Q8BYF5	Putative uncharacterized protein (Fragment)	Efr3a	120	13204	12	1
Q8BH57	WD repeat-containing protein 48 (USP1-associated factor 1)	Wdr48 Kiaa1449 Uaf1	676	76007	16	5
Q80WC1	Ubinuclein-2	Ubn2 Kiaa2030	1314	141740	6	2
J3KMH5	Melanoma inhibitory activity protein 3	Mia3	781	87209	8	3
D3YVU7	Lysine-specific demethylase 2B	Kdm2b	1254	143264	7	5
Q6PFA7	Hnrpa3 protein (Fragment)	Hnrnpa3 Hnrpa3	303	32207	10	2
E9Q0P8	Serine/threonine-protein kinase A-Raf	Araf	419	46255	7	1
Q8BRH7	Putative uncharacterized protein (Fragment)	Acap2 Centb2	137	14198	18	1
O70373	Xin actin-binding repeat-containing protein 1 (Cardiomyopathy-associated protein 1)	Xirp1 Cmya1 Xin	1129	123431	7	4
W6PPR4	480-kDa ankyrinG	Ank3	4332	473787	12	13
O55017	Voltage-dependent N-type calcium channel subunit alpha-1B (Brain calcium channel III) (BIII) (Calcium channel, L type, alpha-1 polypeptide isoform 5) (Voltage-gated calcium channel subunit alpha Cav2.2)	Cacna1b Cach5 Cacnl1a5 Cchn1a	2327	261479	9	8
E9QQ63	VPS10 domain-containing receptor SorCS1	Sorcs1	1179	131560	4	3
Q5QNU0	Nucleoporin 88, isoform CRA_b	Nup88 mCG_21193	742	83666	5	2
O08648	Mitogen-activated protein kinase kinase kinase 4 (EC 2.7.11.25) (MAPK/ERK kinase kinase 4) (MEK kinase 4) (MEKK 4)	Map3k4 Mekk4	1597	179833	4	3
Q5SS00	DBF4-type zinc finger-containing protein 2 homolog	Zdbf2	2493	273745	2	2
D3YUX2	Multiple PDZ domain protein	Mpdz	2056	218796	12	12
E9PZI6	Katanin p60 ATPase-containing subunit A1 (Katanin p60 subunit A1) (EC 3.6.4.3) (p60 katanin)	Katna1	493	56215	8	2
Q80W12	TROVE domain family, member 2	Trove2 Ssa2	538	60172	18	3
E9QAT4	Protein Sec16a	Sec16a	2357	254200	5	5
Q3TL44	NLR family member X1	Nlrx1	975	107831	5	3
A2AJ26	ATP-binding cassette sub-family A member 2 (ATP-binding cassette, sub-family A (ABC1), member 2)	Abca2 mCG_18727	2433	270522	5	5
Q5DTR6	MKIAA4045 protein (Fragment)	C2cd2 mKIAA4045	724	79502	9	3
Q8BRI6	Putative uncharacterized protein	Lins1 Lins Lins2 Wins2	280	31928	12	2
F6VBR4	Regulating synaptic membrane exocytosis protein 1	Rims1	1424	157894	8	6
A2A8V8	Serine/arginine repetitive matrix protein 1	Srrm1	909	102660	15	7
A0A087WR62	Amyloid beta A4 precursor protein-binding family B member 1	Apbb1	451	49999	18	4
A0A0R4J033	Expressed sequence AW544981 (Protein FAM83F)	Fam83f AW544981 mCG_11523	495	54964	8	3
Q8BZN6-2	Dedicator of cytokinesis protein 10 (Zizimin-3)	Dock10 Kiaa0694 Ziz3	2150	253464	7	7
Q80X68	Citrate synthase	Csl mCG_19869	466	52325	40	9
P08249	Malate dehydrogenase, mitochondrial (EC 1.1.1.37)	Mdh2 Mor1	338	35611	54	6
A2AKB9	DDB1- and CUL4-associated factor 10 (WD repeat-containing protein 32)	Dcaf10 Wdr32	566	61558	15	6
O88492	Perilipin-4 (Adipocyte protein S3-12)	Plin4 Kiaa1881	1403	139414	5	3
A2AMI2	Eukaryotic translation initiation factor 4 gamma 3	Eif4g3	1579	174817	4	4
A2AJ15	Endoplasmic reticulum mannosyl-oligosaccharide 1,2-alpha-mannosidase (EC 3.2.1.113) (ER alpha-1,2-mannosidase) (ER mannosidase 1) (ERMan1) (Man9GlcNAc2-specific-processing alpha-mannosidase) (Mannosidase alpha class 1B member 1)	Man1b1	658	75150	6	2
Q8CCV1	Putative uncharacterized protein	Gspt1	498	55612	26	6
F8VPN4	Protein Agl	Agl	1532	174286	7	7
O35737	Heterogeneous nuclear ribonucleoprotein H (hnRNP H) [Cleaved into: Heterogeneous nuclear ribonucleoprotein H, N-terminally processed]	Hnrnph1 Hnrph Hnrph1	449	49199	6	2
E9QAM4	Protein-arginine deiminase type-3	Padi3	654	74116	4	1
Q8CDS1	Putative uncharacterized protein	Spata31d1a	1235	133462	18	7
B9EJ72	Odz2 protein	Tenm2 Odz2	2733	303343	3	3
Q62261-2	Spectrin beta chain, non-erythrocytic 1 (Beta-II spectrin) (Embryonic liver fodrin) (Fodrin beta chain)	Sptbn1 Elf Spnb-2 Spnb2 Sptb2	2363	251154	11	9
E9PYF1	Aminopeptidase B	Rnpep	611	68002	5	1
Q91WR3-3	Activating signal cointegrator 1 complex subunit 2 (ASC-1 complex subunit p100) (Trip4 complex subunit p100)	Ascc2 Asc1p100	749	87713	8	4
E9PZZ1	PR domain zinc finger protein 13 (EC 2.1.1.-) (PR domain-containing protein 13)	Prdm13	754	78705	14	3
Q3U486	Putative uncharacterized protein	Angpt4	509	57827	6	2
G3UWR2	PERQ amino acid-rich with GYF domain-containing protein 2	Gigyf2	1122	129640	4	2
Q80U40	RIMS-binding protein 2 (RIM-BP2)	Rimbp2 Kiaa0318 Rbp2	1072	118342	3	2
Q99LH4	Zinc finger protein 672	Znf672 Zfp672	468	52154	5	1
B2RTP7	Krt2 protein	Krt2	707	70923	16	4
Q5SF07	Insulin-like growth factor 2 mRNA-binding protein 2 (IGF2 mRNA-binding protein 2) (IMP-2) (IGF-II mRNA-binding protein 2) (VICKZ family member 2)	Igf2bp2 Imp2 Vickz2	592	65584	5	1
Q9R0M0-2	Cadherin EGF LAG seven-pass G-type receptor 2 (Flamingo homolog)	Celsr2	2920	316527	13	2
P52480-2	Pyruvate kinase PKM (EC 2.7.1.40) (Pyruvate kinase muscle isozyme)	Pkm Pk3 Pkm2 Pykm	531	57985	44	1
Q8BYE8	Putative uncharacterized protein	Nav2	576	60696	18	4
Q8C9B9	Death-inducer obliterator 1 (DIO-1) (Death-associated transcription factor 1) (DATF-1)	Dido1 Datf1 Dio1	2256	247173	10	3
Q8K173	Col3a1 protein (Fragment)	Col3a1	1222	115140	62	1
A9C475	Dual-specificity tyrosine-(Y)-phosphorylation regulated kinase 1a (Dual-specificity tyrosine-phosphorylation-regulated kinase 1A)	Dyrk1a mCG_117173	763	85494	5	2
Q8BIG4	F-box only protein 28	Fbxo28 D1Ertd578e Kiaa0483	368	40978	12	3
O70361	Period circadian protein homolog 3 (mPER3) (Circadian clock protein PERIOD 3)	Per3	1113	120911	2	1
A0A0J9YTQ3	DNA polymerase nu	Poln	822	92003	22	7
Q3V0G7-2	GTPase-activating Rap/Ran-GAP domain-like protein 3	Garnl3	1038	110527	10	6
E9Q2H1	E3 ubiquitin-protein ligase UBR5	Ubr5	2798	308967	10	12
Q3U0S4	Putative uncharacterized protein	Ctdp1	960	104524	5	2
A0A0B4J1E3	DNA-binding protein SMUBP-2 (Immunoglobulin mu binding protein 2)	Ighmbp2 mCG_3886	993	109343	11	6
Q9D3U7	Histone H2A	H2afy3	208	22474	17	2
Q9QYX7	Protein piccolo (Aczonin) (Brain-derived HLMN protein) (Multidomain presynaptic cytomatrix protein)	Pclo Acz	5068	550842	6	14
Q99PV8-3	B-cell lymphoma/leukemia 11B (BCL-11B) (B-cell CLL/lymphoma 11B) (COUP-TF-interacting protein 2) (Radiation-induced tumor suppressor gene 1 protein) (mRit1)	Bcl11b Ctip2 Rit1	884	74175	16	4
P21447	Multidrug resistance protein 1A (EC 3.6.3.44) (ATP-binding cassette sub-family B member 1A) (MDR1A) (Multidrug resistance protein 3) (P-glycoprotein 3)	Abcb1a Abcb4 Mdr1a Mdr3 Pgy-3 Pgy3	1276	140646	6	1
A0A087WR13	Protein Dnah7c	Dnah7c	4024	462053	10	3
P60882	Multiple epidermal growth factor-like domains protein 8 (Multiple EGF-like domains protein 8) (Epidermal growth factor-like protein 4) (EGF-like protein 4)	Megf8 Egfl4	2789	297487	2	3
A2A513	Keratin, type I cytoskeletal 10	Krt10	561	57041	24	4
Q3UHH3	Putative uncharacterized protein	Hspg2	2672	287509	28	8
Q6PG16	Holliday junction recognition protein (Fetal liver expressing gene 1 protein homolog) (mFleg1)	Hjurp Fleg1	667	74199	6	1
E9PX59	Sterile alpha motif domain-containing protein 9-like	Samd9l	1579	182253	3	3
Q8CIP5	Protein dispatched homolog 2	Disp2 Kiaa1742	1345	147944	2	1
Q8CH77	Neuron navigator 1 (Pore membrane and/or filament-interacting-like protein 3)	Nav1 Kiaa1151 Pomfil3	1875	202366	8	7
D3YUP0	Vacuolar protein sorting-associated protein 8 homolog	Vps8	1429	161330	10	7
P56480	ATP synthase subunit beta, mitochondrial (EC 3.6.3.14)	Atp5b	529	56301	46	11
E9Q0J2	Ral GTPase-activating protein subunit beta	Ralgapb	1507	167942	2	1
Q7TMD7	Desmoglein-4	Dsg4	1041	114449	2	1
Q8C033	Rho guanine nucleotide exchange factor 10	Arhgef10 Kiaa0294	1345	147945	5	3
B2RXS4	Plexin-B2	Plxnb2	1842	206229	10	7
A0A0R4J0A4	Vascular endothelial growth factor receptor 1	Flt1	1333	149846	9	5
D3Z0G0	NIF3-like protein 1	Nif3l1 mCG_117462	329	36268	14	2
Q80TF3	Protocadherin-19	Pcdh19 Kiaa1313	1145	126035	2	1
Q8R2M8	TRM1 tRNA methyltransferase 1 homolog (S. cerevisiae)	Trmt1 D8Ertd812e	625	68081	27	1
G3UW82	MCG140437, isoform CRA_d (Protein Myh2)	Myh2 mCG_140437	1942	223217	63	5
Q8VCT9	Dual specificity testis-specific protein kinase 2 (EC 2.7.12.1) (Testicular protein kinase 2)	Tesk2	570	63470	10	2
E5CYJ9	Protein unc-79 homolog (UNC79)	Unc79	2654	297257	6	7
Q7TNI3	L-type dihydropyridine-sensitive calcium channel alpha-1f subunit (Voltage-dependent L-type calcium channel subunit alpha-1F)	Cacna1f Cav1.4	1984	221825	3	4
Q3UHQ5	Putative uncharacterized protein	Gcn1l1	2671	292989	4	4
E9PX94	Coiled-coil and C2 domain-containing protein 1A	Cc2d1a	897	98643	12	4
B8JJC1	Tyrosyl-DNA phosphodiesterase 1 (Tyrosyl-DNA phosphodiesterase 1, isoform CRA_b)	Tdp1 mCG_14730	609	68590	9	2
Q07417	Short-chain specific acyl-CoA dehydrogenase, mitochondrial (SCAD) (EC 1.3.8.1) (Butyryl-CoA dehydrogenase)	Acads	412	44890	49	10
A2KF29	Sperm motility kinase Tcr mutant form (SmokTcr) (Tcr) (EC 2.7.11.1) (Dominant negative form of Smok) (Responder protein Smok-Tcr)	Smoktcr	484	54619	27	9
Q8BHS8	Syntabulin (Golgi-localized syntaphilin-related protein) (m-Golsyn) (Syntaxin-1-binding protein)	Sybu Golsyn Kiaa1472	665	73024	8	3
E9Q4U7	Protein diaphanous homolog 2	Diaph2	1102	125411	5	3
B5THE2	Maltase-glucoamylase (EC 3.2.1.20) (Protein Mgam)	Mgam	1827	208548	4	3
A0A0G2JGA1	Box C/D snoRNA protein 1 (Fragment)	Znhit6	185	21691	21	4
E9QNP3	Hornerin	Hrnr	3234	323369	3	4
E9PVD7	Cystic fibrosis transmembrane conductance regulator (EC 3.6.3.49) (ATP-binding cassette sub-family C member 7) (Channel conductance-controlling ATPase) (cAMP-dependent chloride channel)	Cftr	1446	164542	7	6
P97479	Unconventional myosin-VIIa	Myo7a Myo7	2215	254936	7	6
B7ZNJ3	Caskin1 protein	Caskin1	1360	142676	7	4
Q8BH53	Cilia- and flagella-associated protein 69	Cfap69	942	106232	7	3
D3YVT9	Adhesion G protein-coupled receptor L3	Adgrl3	1550	172508	9	7
Q9R0G8	Nik-related protein kinase (EC 2.7.11.1) (Nck-interacting kinase-like embryo specific kinase) (NESK) (NIK-like embryo-specific kinase)	Nrk Nesk	1455	163647	3	2
Q6NS45	Coiled-coil domain-containing protein 66	Ccdc66	935	107372	4	2
Q6PB89	Adarb2 protein (Double-stranded RNA-specific editase B2)	Adarb2	701	77360	25	12
E9Q8T1	Transforming acidic coiled-coil-containing protein 2	Tacc2	2879	305230	6	9
A2ANX3	Phospholipid-transporting ATPase (EC 3.6.3.1)	Atp8b4	1194	135142	8	5
B1AQW2	Microtubule-associated protein	Mapt	390	40892	4	1
Q5SWW4	Mediator of RNA polymerase II transcription subunit 13 (Thyroid hormone receptor-associated protein 1) (Thyroid hormone receptor-associated protein complex 240 kDa component) (Trap240)	Med13 Kiaa0593 Thrap1 Trap240	2171	238589	3	3
E7CHD7	RPGRIP1 variant-11aa (X-linked retinitis pigmentosa GTPase regulator-interacting protein 1)	Rpgrip1	1320	150877	4	2
Q8VI89	Kinesin superfamily protein 1C	Kif1c kif1C	1100	122469	9	4
Q91ZI0	Cadherin EGF LAG seven-pass G-type receptor 3	Celsr3	3301	358479	8	6
Q5BL11	Adnp protein (Fragment)	Adnp	1004	111972	10	5
Q9D0F4	NF-kappa-B-activating protein	Nkap	415	47227	16	3
A0A0G2JGQ6	Serine/threonine-protein kinase DCLK1	Dclk1	739	82105	21	4
Q61930	Alpha-(V1) cardiac myosin heavy chain mRNA (Fragment)	Myh6	102	11708	77	1
A0A0G2JDF8	Serrate RNA effector molecule homolog (Fragment)	Srrt	517	58101	7	1
A0A140LIP2	Protein Ect2l	Ect2l	953	109644	5	2
Q8C9E7	Putative uncharacterized protein	Gm9888	177	18644	22	2
Q80UH5	NOD2	Nod2	1013	112772	6	2
E9PWN4	Protein Zfp738 (Fragment)	Zfp738	126	14553	26	1
A2AJA9-2	Uncharacterized protein C9orf172 homolog	Gm996	974	103586	9	4
Q80X90	Filamin-B (FLN-B) (ABP-280-like protein) (Actin-binding-like protein) (Beta-filamin)	Flnb	2602	277822	14	13
B2RQE3	Stim2 protein	Stim2	812	90387	10	4
Q8K450-2	Sperm-associated antigen 16 protein (Pf20 protein homolog)	Spag16 Pf20	639	47011	5	1
Q6NS46	Protein RRP5 homolog (Apoptosis-linked gene 4 protein) (Programmed cell death protein 11)	Pdcd11 Alg4 Kiaa0185	1862	207777	12	9
Q8BUR4	Dedicator of cytokinesis protein 1 (180 kDa protein downstream of CRK) (DOCK180)	Dock1	1865	215083	4	3
B1AVK5	Protein Col4a6	Col4a6	1691	164033	9	7
A1L0V7	2410001C21Rik protein (Fragment)	Rtfdc1 2410001C21Rik	280	30991	23	2
Q3V1C0	Putative uncharacterized protein	Pik3cg	1102	126414	5	3
G3UY93	Valine--tRNA ligase (Fragment)	Vars	1278	141407	4	2
Q5I1X5	RelA-associated inhibitor (Inhibitor of ASPP protein) (Protein iASPP) (NFkB-interacting protein 1) (PPP1R13B-like protein)	Ppp1r13l Nkip1	824	88976	3	1
Q7M739	Nuclear pore complex-associated intranuclear coiled-coil protein TPR (Nucleoprotein TPR) (Translocated promoter region) (Translocated promoter region, isoform CRA_b)	Tpr mCG_8530	2357	266922	8	10
Q66JQ2	C330011K17Rik protein	Zfp874a C330011K17Rik Zfp874	351	41269	9	1
Q3UJQ9	Succinyl-CoA:3-ketoacid-coenzyme A transferase (EC 2.8.3.5)	Oxct1	486	52278	12	4
Q9JIG4-2	Protein phosphatase 1 regulatory subunit 3F (R3F)	Ppp1r3f DXImx48e	799	84249	9	2
Q9Z1T6-1	1-phosphatidylinositol 3-phosphate 5-kinase (Phosphatidylinositol 3-phosphate 5-kinase) (EC 2.7.1.150) (FYVE finger-containing phosphoinositide kinase) (PIKfyve) (Phosphatidylinositol 3-phosphate 5-kinase type III) (PIPkin-III) (Type III PIP kinase) (p235)	Pikfyve Kiaa0981 Pip5k3	2097	232079	9	7
Q80ZK9	WD and tetratricopeptide repeats protein 1	Wdtc1 Gm695	677	75733	10	2
G3X963	ATPase family AAA domain-containing protein 2 (MCG7707)	Atad2 mCG_7707	1364	155284	5	4
Q61493	DNA polymerase zeta catalytic subunit (EC 2.7.7.7) (Protein reversionless 3-like) (REV3-like) (Seizure-related protein 4)	Rev3l Polz Sez4	3122	350711	5	7
Q3U1B7	Putative uncharacterized protein	Serpina3h	409	45738	52	8
Q8BG95	Protein phosphatase 1 regulatory subunit 12B (Myosin phosphatase-targeting subunit 2) (Myosin phosphatase target subunit 2)	Ppp1r12b Mypt2	976	109049	7	3
A0A0A6YXX3	Lipopolysaccharide-responsive and beige-like anchor protein	Lrba	2577	286193	12	17
O35459	Delta(3,5)-Delta(2,4)-dienoyl-CoA isomerase, mitochondrial (EC 5.3.3.-)	Ech1	327	36118	57	6
Q3USS1	Receptor protein serine/threonine kinase (EC 2.7.11.30)	Bmpr1b	491	55894	9	1
Q3UHK6-3	Teneurin-4 (Ten-4) (Downstream of CHOP4) (Protein Odd Oz/ten-m homolog 4) (Tenascin-M4) (Ten-m4) (Teneurin transmembrane protein 4)	Tenm4 Doc4 Kiaa1302 Odz4 Tnm4	2771	314672	6	8
A0A0U1RNJ1	Fatty acid synthase	Fasn	2502	272226	13	5
A2AGH6	Mediator of RNA polymerase II transcription subunit 12 (Mediator complex subunit 12) (OPA-containing protein) (Thyroid hormone receptor-associated protein complex 230 kDa component) (Trap230) (Trinucleotide repeat-containing gene 11 protein)	Med12 Kiaa0192 Mopa Tnrc11 Trap230	2190	244558	6	6
E9PYJ6	Focadhesin	Focad BC057079	1712	189556	6	4
P07759	Serine protease inhibitor A3K (Serpin A3K) (Contrapsin) (SPI-2)	Serpina3k Mcm2 Spi2	418	46880	44	3
Q8C8L1	Putative uncharacterized protein	Lrrtm2	515	58788	11	2
Q8CHA4	MKIAA1329 protein (Fragment)	Sorcs2 mKIAA1329 N28137	1185	131599	4	3
D3YX43	V-set and immunoglobulin domain-containing protein 10	Vsig10	558	60522	3	1
P97857	A disintegrin and metalloproteinase with thrombospondin motifs 1 (ADAM-TS 1) (ADAM-TS1) (ADAMTS-1) (EC 3.4.24.-)	Adamts1	968	105801	11	6
E9Q5M6	Protein Cfap44	Cfap44	1843	211544	9	8
Q3ZAW8	Keratin 16	Krt16 Krt1-16	470	51693	9	2
F8WIK2	Poly [ADP-ribose] polymerase (PARP) (EC 2.4.2.30)	Parp8	891	99486	7	3
E9PY61	Protein Gpr179	Gpr179	2293	248712	8	10
A2AQP0	Myosin-7B (Myosin cardiac muscle beta chain) (Myosin heavy chain 7B, cardiac muscle beta isoform)	Myh7b	1941	221495	6	4
B9EIU3	Attractin	Atrn	1428	158043	3	2
A0A0R4J1N1	Inter alpha-trypsin inhibitor, heavy chain 4	Itih4	902	100324	9	4
G5E8F4	MCG140999 (Protein Fpgt)	Fpgt mCG_140999	590	65362	16	4
Q3TZ53	Putative uncharacterized protein (Fragment)	Drp2	969	108992	3	1
P35487	Pyruvate dehydrogenase E1 component subunit alpha, testis-specific form, mitochondrial (EC 1.2.4.1) (PDHE1-A type II)	Pdha2 Pdha-2 Pdhal	391	43413	13	2
Q05306	Collagen alpha-1(X) chain	Col10a1	680	66776	15	4
Q9ERQ3	Zinc finger protein 704 (Glucocorticoid-induced gene 1 protein)	Znf704 Gig1 Zfp704	566	61151	5	2
Q3V1C1	Protein Zfp142	Zfp142	1740	194822	2	2
Q8BH95	Enoyl-CoA hydratase, mitochondrial (EC 4.2.1.17) (Enoyl-CoA hydratase 1) (Short-chain enoyl-CoA hydratase) (SCEH)	Echs1	290	31474	49	9
B2RSU7	GRIP and coiled-coil domain containing 2 (GRIP and coiled-coil domain-containing protein 2)	Gcc2 mCG_19017	1680	194556	9	8
E9Q7C4	Protein Prr14l	Prr14l C330019G07Rik Prl14l	1971	215822	16	13
Q4H4B4	MAGI1c	Magi1 MAGI1	1470	161757	4	3
O55103	Periaxin	Prx	1391	147688	13	5
O54988-2	STE20-like serine/threonine-protein kinase (STE20-like kinase) (mSLK) (EC 2.7.11.1) (Etk4) (STE20-related kinase SMAK) (STE20-related serine/threonine-protein kinase) (STE20-related kinase) (Serine/threonine-protein kinase 2)	Slk Kiaa0204 Stk2	1233	137713	3	2
D3Z1J2	Coiled-coil domain-containing protein 112 (MCG3462, isoform CRA_b)	Ccdc112 mCG_3462	525	60994	3	1
Q3ZK22	Vezatin	Vezt	780	87987	4	2
A2A258	Polycystic kidney disease 1 like 3	Pkd1l3 PKD1L3	2151	236387	2	3
Q8BQX9	Putative uncharacterized protein	Kcnab3	404	43877	18	4
A0A0N4SVA7	Lysine-specific demethylase 5A	Kdm5a	814	93305	9	5
E9PZP8	Protein Herc1	Herc1	4859	532665	11	22
A2A654	Protein Bptf	Bptf	3036	333227	9	1
Q9JLI2	Collagen type V alpha 3 chain (Collagen, type V, alpha 3) (Procollagen, type V, alpha 3, isoform CRA_b) (Protein Col5a3)	Col5a3 mCG_67925	1739	171968	11	8
A0A140LJ72	Protein Muc16	Muc16	8478	908759	3	8
E9Q4K7	Protein Kif13b	Kif13b	1843	204574	9	6
F2Z3U2	SET-binding protein	Setbp1	1582	173076	15	10
E9Q6R7	Protein Utrn	Utrn	3430	392707	3	4
Q70UZ7	von Willebrand factor A domain-containing protein 2 (A domain-containing protein similar to matrilin and collagen) (AMACO)	Vwa2 Amaco	791	85639	16	5
Q6KAU7-2	Pleckstrin homology domain-containing family G member 2 (PH domain-containing family G member 2) (Common site lymphoma/leukemia guanine nucleotide exchange factor) (Common site lymphoma/leukemia GEF)	Plekhg2	1340	139196	10	10
D0U269	Beta-globin	Hbbt1	147	15854	52	1
F6ZL86	DnaJ homolog subfamily C member 1 (Fragment)	Dnajc1	357	41151	15	3
D3Z1I2	ARF GTPase-activating protein GIT2	Git2	681	75971	7	3
A0A140T8S5	Chromosome alignment-maintaining phosphoprotein 1 (Fragment)	Champ1	656	70712	10	3
J3QQ13	Troponin T, cardiac muscle	Tnnt2	302	35944	42	7
E9Q1M1	Protein Pdzd2	Pdzd2	2796	296725	14	15
B8JJE0	Protein Adgrv1	Adgrv1 Gpr98	6298	687618	2	4
Q8BRT2	Putative uncharacterized protein	Grik1	934	106163	17	6
Q6P5F9	Exportin-1 (Exp1) (Chromosome region maintenance 1 protein homolog)	Xpo1 Crm1	1071	123093	3	2
P54071	Isocitrate dehydrogenase [NADP], mitochondrial (IDH) (EC 1.1.1.42) (ICD-M) (IDP) (NADP(+)-specific ICDH) (Oxalosuccinate decarboxylase)	Idh2	452	50906	5	2
Q8BKY2	Putative uncharacterized protein	Col3a1	1464	138947	54	5
Q03734	Serine protease inhibitor A3M (Serpin A3M)	Serpina3m	418	47064	43	3
Q7TSH3	Zinc finger protein 516	Znf516 Kiaa0222 Zfp516	1157	124788	4	2
Q14BL3	Uncharacterized protein	Actl11 4921517D21Rik	1207	130733	7	4
Q99PB3	Mage-d3	Tro	1987	197157	10	10
Q9D735	Uncharacterized protein C19orf43 homolog		173	18377	28	2
A0A0U1RNW8	Transcription factor SOX-6	Sox6	828	91931	7	3
A2AP29	Probable ATP-dependent RNA helicase DDX58 (Fragment)	Ddx58	707	80200	5	2
E9Q411	Protein Nbas	Nbas	2356	265772	5	1
A2AF47	Dedicator of cytokinesis protein 11 (Activated Cdc42-associated guanine nucleotide exchange factor) (ACG) (Zizimin-2)	Dock11 Ziz2	2073	237769	6	5
P28867	Protein kinase C delta type (EC 2.7.11.13) (Tyrosine-protein kinase PRKCD) (EC 2.7.10.2) (nPKC-delta) [Cleaved into: Protein kinase C delta type regulatory subunit; Protein kinase C delta type catalytic subunit (Sphingosine-dependent protein kinase-1) (SDK1)]	Prkcd Pkcd	674	77547	4	2
Q8R146	Acylamino-acid-releasing enzyme (AARE) (EC 3.4.19.1) (Acyl-peptide hydrolase) (APH) (Acylaminoacyl-peptidase)	Apeh	732	81581	6	2
Q8BI79	Coiled-coil domain-containing protein 40 (Protein links)	Ccdc40 Lnks	1192	136772	7	5
A0A087WP85	Kinectin	Ktn1	1275	146537	12	7
Q3ULS5	Putative uncharacterized protein	Esco1	843	95098	13	5
F8WI37	Histone-lysine N-methyltransferase 2C	Kmt2c Mll3	4904	540264	7	14
A4Q9F1	Protein monoglycylase TTLL8 (EC 6.3.2.-) (Tubulin--tyrosine ligase-like protein 8)	Ttll8	832	94915	23	8
P13541	Myosin-3 (Myosin heavy chain 3)	Myh3 Myhse	1940	223789	22	7
D3Z3A8	Unconventional myosin-IXa	Myo9a	2631	301835	10	9
Q8BM65	Neuronal tyrosine-phosphorylated phosphoinositide-3-kinase adapter 2	Nyap2 Kiaa1486	682	73897	6	2
P08043	Zinc finger protein 2 (Zfp-2) (Protein mKR2)	Zfp2 Fnp-2 Mkr2 Zfp-2	459	52534	11	3
G3X9K3	Brefeldin A-inhibited guanine nucleotide-exchange protein 1 (BIG1) (Brefeldin A-inhibited GEP 1) (ADP-ribosylation factor guanine nucleotide-exchange factor 1)	Arfgef1	1846	208498	5	4
Q3UT19	Putative uncharacterized protein	Prpf3	683	77265	6	2
Q8VDD5	Myosin-9 (Cellular myosin heavy chain, type A) (Myosin heavy chain 9) (Myosin heavy chain, non-muscle IIa) (Non-muscle myosin heavy chain A) (NMMHC-A) (Non-muscle myosin heavy chain IIa) (NMMHC II-a) (NMMHC-IIA)	Myh9	1960	226370	22	7
E9QMD3	Zinc finger homeobox protein 3	Zfhx3	3723	406109	5	5
Q80U78-3	Pumilio homolog 1	Pum1 Kiaa0099	1189	126548	11	6
Q18PE0-3	Protein Dok-7 (Downstream of tyrosine kinase 7)	Dok7	504	64260	20	6
Q30D77	Collagen alpha-1(XXIV) chain	Col24a1	1733	175732	12	8
Q8VDM6-2	Heterogeneous nuclear ribonucleoprotein U-like protein 1	Hnrnpul1 Hnrpul1	859	85046	8	4
G5E8B1	Protein tyrosine phosphatase, non-receptor type 13 (Tyrosine-protein phosphatase non-receptor type 13)	Ptpn13 mCG_8763	2451	270231	10	9
Q9ERD7	Tubulin beta-3 chain	Tubb3	450	50419	30	2
Q8BGL1	Probable protein phosphatase 1N (EC 3.1.3.16)	Ppm1n	404	43201	12	3
E9QAM5	Helicase with zinc finger domain 2 (EC 3.6.4.-) (PPAR-gamma DNA-binding domain-interacting protein 1) (PDIP1) (PPAR-gamma DBD-interacting protein 1)	Helz2	2947	331563	3	5
Q8K394	Inactive phospholipase C-like protein 2 (PLC-L(2)) (PLC-L2) (Phospholipase C-L2) (Phospholipase C-epsilon-2) (PLC-epsilon-2)	Plcl2 Kiaa1092 Plce2	1128	125772	5	3
E9Q774	Protein Akap11	Akap11	1894	208760	6	5
O35231	Kinesin-like protein KIFC3	Kifc3	824	92556	21	8
Q8K4E0	Alstrom syndrome protein 1 homolog	Alms1 Kiaa0328	3251	360216	6	10
A0A0R4J0Z3	Aquaporin 4, isoform CRA_a (Aquaporin-4)	Aqp4 mCG_6271	323	34535	7	1
Q52KR3	Protein prune homolog 2 (BNIP2 motif-containing molecule at the C-terminal region 1)	Prune2 Bmcc1 Kiaa0367	3084	339517	3	6
E9PUD2	Dynamin-1-like protein	Dnm1l	712	79533	18	6
B1B1A8	Myosin light chain kinase, smooth muscle (Myosin, light polypeptide kinase)	Mylk	1950	213608	6	5
A2CG49-7	Kalirin (EC 2.7.11.1) (Protein Duo) (Serine/threonine-protein kinase with Dbl- and pleckstrin homology domain)	Kalrn	2964	338884	9	11
D3Z7R7	Minor histocompatibility protein HA-1	Hmha1	1127	124030	2	1
Q91ZM2	SH2B adapter protein 1 (Pro-rich, PH and SH2 domain-containing signaling mediator) (PSM) (SH2 domain-containing protein 1B) (SH2-B PH domain-containing signaling mediator 1)	Sh2b1 Sh2bpsm1	756	79625	5	3
Q9QX47	Protein SON (Negative regulatory element-binding protein) (NRE-binding protein)	Son Nrebp	2444	265649	3	3
B2RU79	Latent transforming growth factor beta binding protein 4	Ltbp4	1666	178655	2	2
Q8K2Z4-2	Condensin complex subunit 1 (Chromosome condensation-related SMC-associated protein 1) (Chromosome-associated protein D2) (mCAP-D2) (Non-SMC condensin I complex subunit D2) (XCAP-D2 homolog)	Ncapd2 Capd2 Cnap1 Kiaa0159	1392	156877	3	2
Q8VD21	Ankrd24 protein (Fragment)	Ankrd24	630	67786	17	6
E9PVX6	Protein Mki67	Mki67	3177	350864	12	19
Q62504-3	Msx2-interacting protein (SMART/HDAC1-associated repressor protein) (SPEN homolog)	Spen Kiaa0929 Mint Sharp	3644	389155	5	7
Q6X7S9	EP300-interacting inhibitor of differentiation 2 (EID-2) (CREBBP/EP300 inhibitor 2) (EID-1-like inhibitor of differentiation 2)	Eid2 Cri2	236	25304	19	3
Q9D4E6	Polyadenylate-binding protein (PABP)	Pabpc6 Pabpc3	643	71001	6	2
A2AQ07	Tubulin beta-1 chain	Tubb1	451	50441	4	1
Q60592	Microtubule-associated serine/threonine-protein kinase 2 (EC 2.7.11.1)	Mast2 Mast205	1734	190533	7	5
Q8VDN2	Sodium/potassium-transporting ATPase subunit alpha-1 (Na(+)/K(+) ATPase alpha-1 subunit) (EC 3.6.3.9) (Sodium pump subunit alpha-1)	Atp1a1	1023	112982	39	8
Q91VW5	Golgin subfamily A member 4 (tGolgin-1)	Golga4	2238	257561	7	6
Q6ZPV2	DNA helicase INO80 (EC 3.6.4.12) (INO80 complex subunit A) (Putative DNA helicase INO80 complex homolog 1)	Ino80 Inoc1 Kiaa1259	1559	176519	10	8
A2A9H6	Protein Gm884	Gm884	3643	405696	4	7
Q3ULW6	Coiled-coil domain-containing protein 33 (Speriolin-binding factor)	Ccdc33	985	110198	7	5
H7BX05	Obscurin	Obscn	8032	874552	35	4
Q9QZH1	Left-right dynein	Dnah11 Dnahc11 Lrd	4488	516194	5	9
Q8BW88	Pleckstrin homology domain-containing family S member 1 (PH domain-containing family S member 1)	Plekhs1	474	53077	8	2
Q8CGC7	Bifunctional glutamate/proline--tRNA ligase (Bifunctional aminoacyl-tRNA synthetase) [Includes: Glutamate--tRNA ligase (EC 6.1.1.17) (Glutamyl-tRNA synthetase) (GluRS); Proline--tRNA ligase (EC 6.1.1.15) (Prolyl-tRNA synthetase) (ProRS)]	Eprs Qprs	1512	170078	12	8
O88493	Type VI collagen alpha 3 subunit	Col6a3	2657	286881	56	7
Q99MZ6	Unconventional myosin-VIIb	Myo7b	2113	240856	11	11
Q61315-3	Adenomatous polyposis coli protein (Protein APC) (mAPC)	Apc	2845	299882	10	12
F8WH29	Fibrocystin-L	Pkhd1l1	4247	464508	5	9
B1AUH1	Receptor-type tyrosine-protein phosphatase U (R-PTP-U) (EC 3.1.3.48) (Ftp-1) (Pancreatic carcinoma phosphatase 2) (PCP-2) (Protein-tyrosine phosphatase-lamda) (PTP-lambda) (PTPlambda) (Receptor-type protein-tyrosine phosphatase psi) (R-PTP-psi)	Ptpru Pcp2 Ptpf	1446	162493	2	1
A0A140LJ04	Zinc finger ZZ-type and EF-hand domain-containing protein 1	Zzef1	2953	331300	10	9
Q9D818	Suppressor APC domain-containing protein 2 (Protein Ang)	Sapcd2	391	42780	19	2
Q8K1S4-2	Netrin receptor UNC5A (Protein unc-5 homolog 1) (Protein unc-5 homolog A)	Unc5a Kiaa1976 Unc5h1	898	92924	3	1
E9Q286	Little elongation complex subunit 1 (Interactor of little elongator complex ELL subunit 1)	Ice1 Kiaa0947	2241	242251	7	8
Q3TDD8	Putative uncharacterized protein	Eif4b	609	68710	27	9
Q3UHD3	Microtubule-associated tumor suppressor candidate 2 homolog (Cardiac zipper protein) (Microtubule plus-end tracking protein TIP150) (Tracking protein of 150 kDa)	Mtus2 Cazip Kiaa0774 Tip150	1353	147355	7	4
Q8VHE6	Dynein heavy chain 5, axonemal (Axonemal beta dynein heavy chain 5) (mDNAH5) (Ciliary dynein heavy chain 5)	Dnah5 Dnahc5	4621	527563	4	10
Q3U962	Collagen alpha-2(V) chain	Col5a2	1497	145018	32	30
A0A0G2JE26	Anthrax toxin receptor 2	Antxr2	517	56929	7	2
Q9ER67	Maged2 protein (Protein Maged2)	Maged2	616	65401	4	1
Q07139	Protein ECT2 (Epithelial cell-transforming sequence 2 oncogene)	Ect2 mKIAA4037	913	103131	4	2
A2ARV4	Low-density lipoprotein receptor-related protein 2 (LRP-2) (Glycoprotein 330) (gp330) (Megalin)	Lrp2	4660	519212	5	8
E9PUQ1	Leucine-zipper-like transcriptional regulator 1	Lztr1	837	94480	14	7
A0A0N4SUJ0	WASH complex subunit FAM21 (Fragment)	Fam21	1051	113643	7	3
Q9EPQ8	Transcription factor 20 (TCF-20) (Nuclear factor SPBP) (Stromelysin-1 PDGF-responsive element-binding protein) (SPRE-binding protein)	Tcf20 Spbp	1987	215681	4	4
E9QNS0	NACHT, LRR and PYD domains-containing protein 6	Nlrp6	882	98737	6	3
P07724	Serum albumin	Alb Alb-1 Alb1	608	68693	37	13
O88738	Baculoviral IAP repeat-containing protein 6 (EC 6.3.2.-) (BIR repeat-containing ubiquitin-conjugating enzyme) (BRUCE) (Ubiquitin-conjugating BIR domain enzyme apollon) (APOLLON)	Birc6 Kiaa1289	4882	532176	7	15
Q3UBV2	Putative uncharacterized protein	Ltf	707	77886	18	6
E9Q8T7	Protein Dnah1	Dnah1 Dnahc1	4250	487074	8	16
Q3UYK3	TBC1 domain family member 9	Tbc1d9 Kiaa0882	1264	143023	9	3
A2A6A1	G patch domain-containing protein 8	Gpatch8 Gpatc8 Kiaa0553	1505	164987	3	2
A0A0R4J197	Roundabout homolog 4	Robo4	1015	108930	8	5
A0A0J9YU03	DNA polymerase subunit gamma-1	Polg	261	29041	6	1
B2RX08	Spectrin beta 1	Sptb Spnb1	2329	268103	7	7
B2BBR6	Xeplin variant 1	Xirp2 Cmya3	701	79130	7	2
Q923L3	CUB and sushi domain-containing protein 1 (CUB and sushi multiple domains protein 1)	Csmd1	3564	387864	5	9
Q542Q3	G two S phase expressed protein 1, isoform CRA_a (G2 and S phase-expressed protein 1)	Gtse1 mCG_11997	741	78751	30	11
F8WJ98	Transmembrane and coiled-coil domains protein 1 (Fragment)	Tmcc1	690	76173	23	8
F8VQI4	Transmembrane channel-like protein	Tmc3	1130	128663	3	3
B7ZNJ5	Odz3 protein	Tenm3 Odz3	2699	300979	8	8
P27656	Hepatic triacylglycerol lipase (HL) (Hepatic lipase) (EC 3.1.1.3) (Lipase member C)	Lipc Hpl	510	57389	9	2
Q99LB0	Deoxynucleotidyltransferase terminal-interacting protein 1 (Terminal deoxynucleotidyltransferase-interacting factor 1) (TdIF1) (TdT-interacting factor 1)	Dnttip1 Tdif1	328	36852	8	1
Q8R0W0	Epiplakin	Eppk1	6548	724747	3	13
Q9CZK6	Ankyrin repeat and SAM domain-containing protein 3	Anks3 Kiaa1977	655	72082	32	8
E9Q7G4	BAH and coiled-coil domain-containing protein 1	Bahcc1	2643	282545	20	22
J3KMM5	Calcium-transporting ATPase (EC 3.6.3.8)	Atp2a2	1044	114858	24	13
B9EJ52	Phospholipid-transporting ATPase (EC 3.6.3.1)	Atp10d	1416	158297	8	5
Q810S7	Cog1 protein (Conserved oligomeric Golgi complex subunit 1)	Cog1	396	44061	11	2
C1IE02	Receptor expression-enhancing protein	Reep2 REEP2	252	28252	56	8
D3YYI7	Probable E3 ubiquitin-protein ligase RNF217 (EC 6.3.2.-) (IBR domain-containing protein 1) (RING finger protein 217)	Rnf217 Ibrdc1	515	56036	8	2
A2BFF5	Cytoplasmic dynein 1 intermediate chain 2	Dync1i2	637	71296	20	7
E9PU96	Nucleolar pre-ribosomal-associated protein 1	Urb1	2277	254840	5	5
A2ALV7	Protein AI314180 (Fragment)	AI314180	1490	164520	8	6
Q4U2R1	E3 ubiquitin-protein ligase HERC2 (EC 6.3.2.-) (HECT domain and RCC1-like domain-containing protein 2)	Herc2 Jdf2 Kiaa0393 Rjs	4836	527462	10	20
Q2LKU9	NACHT, LRR and PYD domains-containing protein 1a (Caspase recruitment domain-containing protein 7) (Death effector filament-forming ced-4-like apoptosis protein) (Nucleotide-binding domain and caspase recruitment domain)	Nlrp1a Card7 Nalp1 Nalp1a Nlrp1	1182	134307	5	2
Q69ZR9	Protein TASOR (Transgene activation suppressor protein)	Fam208a D14Abb1e Kiaa1105 Tasor	1610	181395	8	6
E9Q264	Protein Myh15	Myh15	1925	221844	14	12
P08032	Spectrin alpha chain, erythrocytic 1 (Erythroid alpha-spectrin)	Spta1 Spna1 Spta	2415	279863	4	4
Q3TU49	DNA-directed RNA polymerase subunit (EC 2.7.7.6) (Fragment)	Polr1a Rpo1-4	1361	153562	8	1
Q8K048	Zmym6 protein (Fragment)	Zmym6 D4Wsu24e Zfp258	1222	136421	9	5
B2RWX4	Rint1 protein	Rint1	734	83482	10	4
Q5XG71	Small subunit processome component 20 homolog (Down-regulated in metastasis protein)	Utp20 Drim	2788	317744	4	6
E9QMF5	Neuron navigator 3	Nav3	2366	253029	9	9
E9Q175	Unconventional myosin-VI	Myo6	1253	144773	10	8
Q8BTI8	Serine/arginine repetitive matrix protein 2	Srrm2 Kiaa0324	2703	294841	6	10
B2RQ80	Tnik protein (Traf2 and NCK-interacting protein kinase)	Tnik	1360	154945	9	7
E9QQ25	Striated muscle-specific serine/threonine-protein kinase	Speg	3262	354315	5	9
Q810A7	ATP-dependent RNA helicase DDX42 (EC 3.6.4.13) (DEAD box protein 42)	Ddx42	929	101965	10	3
Q9DCW4	Electron transfer flavoprotein subunit beta (Beta-ETF)	Etfb	255	27623	55	6
B2RXS7	Dock9 protein	Dock9	2088	238528	4	4
E9PVD3	Protocadherin-16 (Protein Dchs1) (Protein dachsous homolog 1)	Dchs1	3291	346385	6	7
A2RSV8	Cytochrome c oxidase subunit 4 isoform 1, mitochondrial (Cytochrome c oxidase subunit IV isoform 1) (Cytochrome c oxidase subunit IV isoform 1, isoform CRA_b)	Cox4i1 mCG_21200	169	19530	58	4
Q571I7	MFLJ00237 protein (Fragment)	Olfml2a mFLJ00237	643	72406	18	7
Q3UEQ1	Type I inositol 3,4-bisphosphate 4-phosphatase	Inpp4a	890	99972	10	2
E9QAE1	Protein Nckap5	Nckap5	1909	209076	6	6
A0A0N4SUJ2	Dysferlin	Dysf	2090	237966	11	12
Q69ZA1	Cyclin-dependent kinase 13 (EC 2.7.11.22) (EC 2.7.11.23) (CDC2-related protein kinase 5) (Cell division cycle 2-like protein kinase 5) (Cell division protein kinase 13)	Cdk13 Cdc2l5 Kiaa1791	1511	164552	18	15
B0V2P5	DmX-like protein 2	Dmxl2	3054	340696	4	6
Q571C7-2	Transcription factor TFIIIB component B'' homolog (Transcription factor IIIB 150) (TFIIIB150) (Transcription factor-like nuclear regulator)	Bdp1 Kiaa1241 Tfnr	2467	271722	4	5
E9PUP1	Protein Syde2	Syde2	1314	144635	6	5
Q3URI6	Protein Zfp560 (Zinc finger protein 560) (Zinc finger protein 560, isoform CRA_b)	Zfp560 mCG_67948	754	85120	10	4
Q5FWI3	Transmembrane protein 2	Tmem2 Kiaa1412	1383	153800	2	2
Q8CGV2	Tryptophan 5-hydroxylase 2 (EC 1.14.16.4) (Neuronal tryptophan hydroxylase) (Tryptophan 5-monooxygenase 2)	Tph2 Ntph	488	55859	13	4
F7C528	Protein Chd3 (Fragment)	Chd3	1886	214042	22	15
E9QJQ9	Serine/threonine-protein kinase WNK2	Wnk2	2101	222050	6	4
Q9CZU6	Citrate synthase, mitochondrial (EC 2.3.3.1) (Citrate (Si)-synthase)	Cs	464	51737	37	9
Q91ZX6-2	Sentrin-specific protease 2 (EC 3.4.22.68) (Axam2) (SUMO-1 protease 1) (SuPr-1) (SUMO-1/Smt3-specific isopeptidase 2) (Smt3ip2) (Sentrin/SUMO-specific protease SENP2)	Senp2 Smt3ip2 Supr1	588	62276	4	1
E9Q2E4	Protein Gm15800	Gm15800	4418	484134	7	15
E9Q0A4	Kinesin-like protein KIF21B	Kif21b	1639	183001	10	8
A0A0G2JEX3	Guanylate-binding protein 5	Gbp5	612	68036	4	1
P97499	Telomerase protein component 1 (Telomerase-associated protein 1) (Telomerase protein 1) (p240) (p80 telomerase homolog)	Tep1 Tp1	2629	291458	8	6
E9QQ33	E3 ubiquitin-protein ligase SH3RF1	Sh3rf1	891	93344	13	5
P04186	Complement factor B (EC 3.4.21.47) (C3/C5 convertase) [Cleaved into: Complement factor B Ba fragment; Complement factor B Bb fragment]	Cfb Bf H2-Bf	761	85005	13	5
P14152	Malate dehydrogenase, cytoplasmic (EC 1.1.1.37) (Cytosolic malate dehydrogenase)	Mdh1 Mor2	334	36511	53	15
A2AUC9	Kelch-like protein 41 (Kelch repeat and BTB domain-containing protein 10)	Klhl41 Kbtbd10	606	68190	5	1
Q3TY51	Kinesin-like protein		956	109303	10	5
P48787	Troponin I, cardiac muscle (Cardiac troponin I)	Tnni3	211	24259	60	4
B2RWX0	Myosin, heavy polypeptide 1, skeletal muscle, adult	Myh1	1942	223345	63	15
P70268	Serine/threonine-protein kinase N1 (EC 2.7.11.13) (Protein kinase C-like 1) (Protein kinase C-like PKN) (Protein-kinase C-related kinase 1) (Serine-threonine protein kinase N)	Pkn1 Pkn Prk1 Prkcl1	946	104411	4	3
Q8K2B3	Succinate dehydrogenase [ubiquinone] flavoprotein subunit, mitochondrial (EC 1.3.5.1) (Flavoprotein subunit of complex II) (Fp)	Sdha	664	72585	21	9
F6ZS70	Serine/threonine-protein kinase MARK2 (Fragment)	Mark2	776	86581	20	9
Q5SQX6	Cytoplasmic FMR1-interacting protein 2 (p53-inducible protein 121)	Cyfip2 Kiaa1168 Pir121	1253	145659	10	5
F8VPU6	Protein Usp9y	Usp9y	2556	292266	1	2
P35601-2	Replication factor C subunit 1 (A1-P145) (Activator 1 140 kDa subunit) (A1 140 kDa subunit) (Activator 1 large subunit) (Activator 1 subunit 1) (Differentiation-specific element-binding protein) (ISRE-binding protein) (Replication factor C 140 kDa subunit) (RF-C 140 kDa subunit) (RFC140) (Replication factor C large subunit)	Rfc1 Ibf-1 Recc1	1131	125914	12	9
Q8BU33	Acetolactate synthase-like protein (EC 2.2.1.-) (IlvB-like protein)	Ilvbl	632	68156	14	3
E9Q8L9	Rab11 family-interacting protein 1	Rab11fip1	1166	125025	10	5
A2AKX3	Probable helicase senataxin (EC 3.6.4.-) (Amyotrophic lateral sclerosis 4 protein homolog) (SEN1 homolog)	Setx Als4 Kiaa0625	2646	297588	7	12
E0CYY3	Ankyrin repeat and MYND domain containing 1 (Ankyrin repeat and MYND domain-containing protein 1)	Ankmy1 mCG_16572	1002	112640	26	14
E9PW83	Protein Fam184a	Fam184a	1143	132973	20	10
A5D6P2	Par-3 (Partitioning defective 3) homolog (C. elegans) (Partitioning defective 3 homolog)	Pard3	1334	149085	8	8
Q3U7R1-2	Extended synaptotagmin-1 (E-Syt1) (Membrane-bound C2 domain-containing protein)	Esyt1 Fam62a Mbc2	1092	99673	2	1
Q62059	Versican core protein (Chondroitin sulfate proteoglycan core protein 2) (Chondroitin sulfate proteoglycan 2) (Large fibroblast proteoglycan) (PG-M)	Vcan Cspg2	3357	366788	8	15
F6QRE9	Protein Erich3	Erich3	1637	180074	4	3
P59511	A disintegrin and metalloproteinase with thrombospondin motifs 20 (ADAM-TS 20) (ADAM-TS20) (ADAMTS-20) (EC 3.4.24.-)	Adamts20	1906	212067	5	4
D3YW87	Filamin-C	Flnc	2693	287363	9	10
A0A0R4J1I6	Nuclear pore membrane glycoprotein 210	Nup210	1842	199486	20	12
Q99KI0	Aconitate hydratase, mitochondrial (Aconitase) (EC 4.2.1.3) (Citrate hydro-lyase)	Aco2	780	85464	33	17
B2RY59	Neurl4 protein	Neurl4	1561	167479	16	11
P38647	Stress-70 protein, mitochondrial (75 kDa glucose-regulated protein) (GRP-75) (Heat shock 70 kDa protein 9) (Mortalin) (Peptide-binding protein 74) (PBP74) (p66 MOT)	Hspa9 Grp75 Hsp74 Hspa9a	679	73461	49	14
A0A0A6YWM5	Rab3 GTPase-activating protein non-catalytic subunit	Rab3gap2	1367	152542	3	2
Q8CIP4-2	MAP/microtubule affinity-regulating kinase 4 (EC 2.7.11.1)	Mark4 Kiaa1860	752	75415	14	3
E9Q557	Desmoplakin (DP)	Dsp	2883	332913	5	6
E9Q6B6	C-Jun-amino-terminal kinase-interacting protein 3	Mapk8ip3	1300	143445	8	4
F6VUT6	Protein Gm8251	Gm8251	1994	225965	10	13
E9Q2C0	Protein Cfap46	Cfap46	2641	302581	4	5
D3YUA5	F-box/WD repeat-containing protein 7	Fbxw7	710	79848	8	3
Q8R313	Exocyst complex component 6 (Exocyst complex component Sec15A) (SEC15-like protein 1)	Exoc6 Sec15a Sec15l1	802	93077	10	4
Q05D44	Eukaryotic translation initiation factor 5B (eIF-5B) (EC 3.6.5.3) (Translation initiation factor IF-2)	Eif5b If2	1216	137616	14	6
B2RU80	Receptor-type tyrosine-protein phosphatase beta (Protein-tyrosine phosphatase beta) (R-PTP-beta) (EC 3.1.3.48) (Vascular endothelial protein tyrosine phosphatase) (VE-PTP)	Ptprb	1998	224494	8	8
Q8BKX6	Serine/threonine-protein kinase SMG1 (SMG-1) (EC 2.7.11.1)	Smg1 Kiaa0421	3658	409770	8	14
Q07409	Contactin-3 (Brain-derived immunoglobulin superfamily protein 1) (BIG-1) (Plasmacytoma-associated neuronal glycoprotein)	Cntn3 Pang Pcs	1028	113232	10	3
P0C6F1	Dynein heavy chain 2, axonemal (Axonemal beta dynein heavy chain 2) (Ciliary dynein heavy chain 2)	Dnah2 Dnahc2	4456	511569	11	16
E9PXF0	Protein Pcdh17	Pcdh17	1157	126147	25	12
F8WHZ0	FRAS1-related extracellular matrix protein 3	Frem3	2127	235453	7	8
Q8CCE5	DNA topoisomerase 2 (EC 5.99.1.3) (Fragment)	Top2a	1028	116485	5	4
Q5NTY0	DnaJ (Hsp40) homolog, subfamily A, member 1 (DnaJ homolog subfamily A member 1) (MCG9817, isoform CRA_a)	Dnaja1 mCG_9817	397	44868	14	4
Q8BZ60	Stonin-2 (Stoned B)	Ston2 Stn2 Stnb	895	99611	4	2
F8WID5	Tropomyosin alpha-1 chain	Tpm1	326	37413	67	3
Q9QZZ4	Unconventional myosin-XV (Unconventional myosin-15)	Myo15a Myo15	3511	395623	8	12
A0A0R4J1Y3	Probable tRNA N6-adenosine threonylcarbamoyltransferase	Osgep	335	36347	9	2
Q5DU56	Protein NLRC3	Nlrc3	1064	115992	35	12
D3Z041	Long-chain-fatty-acid--CoA ligase 1	Acsl1	699	78035	33	13
Q60847	Collagen alpha-1(XII) chain	Col12a1	3120	340215	8	11
A2AEK1	AlphaCstF-64 variant 4 (Cleavage stimulation factor subunit 2)	Cstf2	554	58572	6	1
Q811L6	Microtubule-associated serine/threonine-protein kinase 4 (EC 2.7.11.1)	Mast4	2618	284003	13	16
D3Z750	Maestro heat-like repeat-containing protein family member 2A (HEAT repeat-containing protein 7B1)	Mroh2a Heatr7b1	1679	190010	5	6
A0A140LJ69	Protein unc-13 homolog B	Unc13b	4390	491041	5	6
E9QP07	Pre-mRNA-processing factor 40 homolog B	Prpf40b	870	99355	9	5
E9Q701	Nuclear receptor corepressor 2	Ncor2	2473	269933	17	16
E9Q4Y4	Protein Cep192	Cep192	2514	276339	18	15
Q8VED5	Keratin, type II cytoskeletal 79 (Cytokeratin-79) (CK-79) (Keratin-79) (K79) (Type-II keratin Kb38)	Krt79 Kb38	531	57552	16	3
Q8R550	SH3 domain-containing kinase-binding protein 1 (Regulator of ubiquitous kinase) (Ruk) (SH3-containing, expressed in tumorigenic astrocytes)	Sh3kbp1 Ruk Seta	709	78170	8	3
Q1HL32	Structural maintenance of chromosomes protein	Smc3	1217	141555	9	6
Q62234	Myomesin-1 (Myomesin family member 1) (Skelemin)	Myom1	1667	185463	23	16
A6X8Z5	Rho GTPase-activating protein 31 (Cdc42 GTPase-activating protein)	Arhgap31 Cdgap Kiaa1204	1425	155276	9	4
A2AAE1-4	Uncharacterized protein KIAA1109 (Fragile site-associated protein homolog)	Kiaa1109 Fsa Kiaa1371	5005	510355	4	9
Q8CGH2	Baz2a protein (Fragment)	Baz2a	769	83307	7	2
Q8CE86	Putative uncharacterized protein	Tbl3	786	86589	5	2
Q52KG5	Kinesin-like protein KIF26A	Kif26a Kiaa1236	1881	196311	21	17
B2RPY5	G-protein coupled receptor 161	Gpr161 Gm208	545	60303	6	1
Q8CJ19	Protein-methionine sulfoxide oxidase MICAL3 (EC 1.14.13.-) (Molecule interacting with CasL protein 3) (MICAL-3)	Mical3 Kiaa0819 Kiaa1364	1993	223719	10	10
Q5SSE9	ATP-binding cassette sub-family A member 13	Abca13	5034	568904	5	9
Q99P72-3	Reticulon-4 (Neurite outgrowth inhibitor) (Nogo protein)	Rtn4 Kiaa0886 Nogo	1162	114222	5	2
P35486	Pyruvate dehydrogenase E1 component subunit alpha, somatic form, mitochondrial (EC 1.2.4.1) (PDHE1-A type I)	Pdha1 Pdha-1	390	43232	38	10
Q3KNY0	Immunoglobulin-like and fibronectin type III domain-containing protein 1	Igfn1	2849	303657	12	14
Q8C765	Hedgehog protein	Shh	437	47788	3	1
P32067	Lupus La protein homolog (La autoantigen homolog) (La ribonucleoprotein)	Ssb Ss-b	415	47756	9	2
Q6RT24	Centromere-associated protein E (Centromere protein E) (CENP-E) (Kinesin superfamily protein 10) (KIF10) (Motor domain of KIF10)	Cenpe	2474	286523	13	14
E9PVZ8	Protein Golgb1	Golgb1	3238	370154	19	29
G5E8S8	MAGUK p55 subfamily member 7 (MCG5292, isoform CRA_d)	Mpp7 mCG_5292	576	65541	6	2
P61809	Cyclin-dependent kinase 5 activator 1 (CDK5 activator 1) (Cyclin-dependent kinase 5 regulatory subunit 1) (TPKII regulatory subunit) [Cleaved into: Cyclin-dependent kinase 5 activator 1, p35 (p35); Cyclin-dependent kinase 5 activator 1, p25 (p25) (Tau protein kinase II 23 kDa subunit) (p23)]	Cdk5r1 Cdk5r Nck5a	307	34031	16	3
B1AVY7	Kinesin-like protein KIF16B	Kif16b Kiaa1590	1312	150057	5	2
Q2PZL6	Protocadherin Fat 4 (FAT tumor suppressor homolog 4) (Fat-like cadherin protein FAT-J)	Fat4 Fatj	4981	540322	5	12
A2ARP8	Microtubule-associated protein 1A	Map1a Mtap1a	3014	325886	13	14
A0A0R4J1K2	Otoferlin	Otof	1992	226094	9	8
B2RWW8	Myosin, heavy polypeptide 8, skeletal muscle, perinatal	Myh8	1937	222693	44	13
Q9D9Y2	Putative uncharacterized protein		395	44049	41	5
Q80UP3	Diacylglycerol kinase zeta (DAG kinase zeta) (EC 2.7.1.107) (Diglyceride kinase zeta) (DGK-zeta)	Dgkz	929	104031	11	5
Q5SX39	Myosin-4 (Myosin heavy chain 2b) (MyHC-2b) (Myosin heavy chain 4)	Myh4	1939	222857	62	24
Q62156	Rep-3 protein	Rep-3	394	44599	6	1
P70670	Nascent polypeptide-associated complex subunit alpha, muscle-specific form (Alpha-NAC, muscle-specific form) (skNAC)	Naca Gm1878	2187	220497	28	25
B1AQY2	Rho GTPase-activating protein 23	Arhgap23	1488	162215	2	2
P09411	Phosphoglycerate kinase 1 (EC 2.7.2.3)	Pgk1 Pgk-1	417	44550	12	3
A2AJ76	Hemicentin-2	Hmcn2	5100	547202	5	10
E9PYK8	Rho guanine nucleotide exchange factor 4	Arhgef4	1855	206294	7	8
Q9D952	Envoplakin (210 kDa cornified envelope precursor protein) (p210)	Evpl	2035	232010	7	4
P63038	60 kDa heat shock protein, mitochondrial (60 kDa chaperonin) (Chaperonin 60) (CPN60) (HSP-65) (Heat shock protein 60) (HSP-60) (Hsp60) (Mitochondrial matrix protein P1)	Hspd1 Hsp60	573	60956	48	14
A2ACV6	Protein SOGA1	Soga1 9830001H06Rik	1654	183144	13	7
Q9QZS0	Collagen alpha-3(IV) chain [Cleaved into: Tumstatin]	Col4a3	1669	161726	28	34
O54796	Tenascin-X	Tnx	4114	447279	7	10
Q9Z2G6	Protein sel-1 homolog 1 (Suppressor of lin-12-like protein 1) (Sel-1L)	Sel1l Sel1h	790	88340	3	1
A3KGK3	Fer-1-like protein 4	Fer1l4	1992	223889	4	3
E9Q309	Protein Cep350	Cep350	3095	346457	7	11
Q148A0	St18 protein (Suppression of tumorigenicity 18 protein) (Suppression of tumorigenicity 18, isoform CRA_b)	St18 mCG_4653	1045	114750	5	3
Q80WC3	Trinucleotide repeat-containing gene 18 protein (Zinc finger protein 469)	Tnrc18 Kiaa1856 Zfp469	2878	307635	11	13
G3X8V5	RIKEN cDNA 2610206B13, isoform CRA_b (RING finger protein 219)	Rnf219 2610206B13Rik mCG_121034	722	79976	29	16
I7DM66	PexRAP	Dhrs7b dhrs7b	323	34987	21	3
Q3UX55	Putative uncharacterized protein (Fragment)	Smarca2	517	60673	32	9
Q80U35	Rho guanine nucleotide exchange factor 17	Arhgef17 Kiaa0337	2057	221669	10	8
E9Q8Z9	Catenin delta-1	Ctnnd1	878	98007	7	4
B2RX12	Canalicular multispecific organic anion transporter 2 (ATP-binding cassette sub-family C member 3) (Multidrug resistance-associated protein 3)	Abcc3 Cmoat2 Mrp3	1523	169123	1	1
Q499E5	Storkhead-box protein 2	Stox2 Kiaa1392	926	102757	4	1
P59598	Putative Polycomb group protein ASXL1 (Additional sex combs-like protein 1)	Asxl1 Kiaa0978	1514	162674	6	4
F8VPN2-2	Testis-expressed sequence 15 protein	Tex15	2785	339757	7	7
O88737	Protein bassoon	Bsn Kiaa0434	3942	418848	7	15
B9EKR3	MCG8951, isoform CRA_a (Zinc finger protein 608)	Zfp608 mCG_8951	1511	162344	12	8
B2RU90	PR domain containing 8 (PR domain zinc finger protein 8)	Prdm8	688	71729	8	3
Q80YQ8	Protein RMD5 homolog A	Rmnd5a	391	43993	28	7
B1APX2	Protein 5031439G07Rik	5031439G07Rik	447	50236	16	3
R4GML6	Centriolin	Cntrl Cep110	2334	268877	26	27
P53657	Pyruvate kinase PKLR (EC 2.7.1.40) (L-PK) (Pyruvate kinase isozymes L/R)	Pklr	574	62309	17	4
Q3V1M1	Immunoglobulin superfamily member 10 (IgSF10)	Igsf10	2594	285596	6	8
Q9QWI6-2	SRC kinase signaling inhibitor 1 (SNAP-25-interacting protein) (SNIP) (p130Cas-associated protein) (p140Cap)	Srcin1 Kiaa1684 P140	1250	130769	12	8
Q3TLX0	Putative uncharacterized protein (Fragment)	Rbm15	948	104156	11	7
E9Q7G0	Protein Numa1	Numa1	2094	235628	17	18
Q3UQS3	Putative uncharacterized protein	Pkn3	756	83866	23	7
E9Q6A6	Collagen alpha-6(VI) chain	Col6a6	2265	246422	23	25
O54724	Polymerase I and transcript release factor (Cav-p60) (Cavin-1)	Ptrf	392	43954	47	8
B7FAU9	Filamin, alpha (Filamin-A)	Flna RP23-436K3.1-002	2639	280498	21	23
A0PJG9	Rbbp6 protein (Fragment)	Rbbp6	587	64723	10	3
C4TGC3	VPS9-ankyrin-repeat protein	Ankrd27 VARP	1048	116833	18	8
Q0P5X1	Leucine-rich repeat and IQ domain-containing protein 1	Lrriq1	1673	191811	28	24
E9Q863	Guanine nucleotide exchange factor DBS	Mcf2l	1067	120670	10	4
Q8R1G3	5-aminolevulinate synthase (EC 2.3.1.37) (5-aminolevulinic acid synthase) (Delta-ALA synthase) (Delta-aminolevulinate synthase)	Alas2	402	44106	6	2
Z4YJW6	Pleckstrin homology domain-containing family M member 2	Plekhm2	1033	114376	4	2
Q7M6Y6	Maestro heat-like repeat-containing protein family member 2B (HEAT repeat-containing protein 7B2)	Mroh2b Heatr7b2	1581	180479	20	15
Q63870	Collagen alpha-1(VII) chain (Long-chain collagen) (LC collagen)	Col7a1	2944	295229	17	21
Q7TSC1	Protein PRRC2A (HLA-B-associated transcript 2) (Proline-rich and coiled-coil-containing protein 2A)	Prrc2a Bat2	2158	229200	8	6
Q8CI75	DIS3-like exonuclease 2 (EC 3.1.13.-)	Dis3l2	870	97775	19	11
Q80W93	Hydrocephalus-inducing protein (Protein Hy-3)	Hydin Hy3	5154	581532	2	4
Q8BMS1	Trifunctional enzyme subunit alpha, mitochondrial (TP-alpha) [Includes: Long-chain enoyl-CoA hydratase (EC 4.2.1.17); Long chain 3-hydroxyacyl-CoA dehydrogenase (EC 1.1.1.211)]	Hadha	763	82670	35	13
Q8R554	OTU domain-containing protein 7A (EC 3.4.19.12) (Zinc finger protein Cezanne 2)	Otud7a Cezanne2 Otud7	926	100797	20	7
B2RQQ5	Microtubule-associated protein 1B	Map1b Mtap1b	2464	270304	8	8
Q60936	Atypical kinase ADCK3, mitochondrial (EC 2.7.-.-) (Chaperone activity of bc1 complex-like) (Chaperone-ABC1-like) (aarF domain-containing protein kinase 3)	Adck3 Cabc1	645	71743	5	2
Q9DCT2	NADH dehydrogenase [ubiquinone] iron-sulfur protein 3, mitochondrial (EC 1.6.5.3) (EC 1.6.99.3) (Complex I-30kD) (CI-30kD) (NADH-ubiquinone oxidoreductase 30 kDa subunit)	Ndufs3	263	30149	46	8
A1ILG8	Chorein	Vps13c	3748	420092	15	25
Q8BYH8	Chromodomain-helicase-DNA-binding protein 9 (CHD-9) (EC 3.6.4.12) (ATP-dependent helicase CHD9) (PPAR-alpha-interacting complex protein 320 kDa) (Peroxisomal proliferator-activated receptor A-interacting complex 320 kDa protein)	Chd9 Kiaa0308 Pric320	2885	323860	7	8
E9Q616	Protein Ahnak	Ahnak	5656	604264	8	13
P04104	Keratin, type II cytoskeletal 1 (67 kDa cytokeratin) (Cytokeratin-1) (CK-1) (Keratin-1) (K1) (Type-II keratin Kb1)	Krt1 Krt2-1	637	65606	10	4
E9Q652	Regulator of G-protein-signaling 12	Rgs12	1451	156517	22	6
A0A0R4J0V5	DNA-directed RNA polymerase subunit (EC 2.7.7.6)	Polr2a	1932	213479	14	12
E9QPE7	Myosin-11	Myh11	1938	223355	10	4
E9PUR0	Protein Ankhd1	Ankhd1	2548	269675	19	8
Q9Z1K7	Adenomatous polyposis coli protein 2	Apc2	2274	243137	22	26
Q3TPE7	Putative uncharacterized protein (Fragment)	Phrf1 AA673488	696	77436	18	6
Q3UZY0-2	Protein SFI1 homolog	Sfi1 Kiaa0542	1216	140273	17	9
E9PUJ6	E3 ubiquitin-protein ligase MYCBP2	Mycbp2	4746	520862	8	19
Q9DB77	Cytochrome b-c1 complex subunit 2, mitochondrial (Complex III subunit 2) (Core protein II) (Ubiquinol-cytochrome-c reductase complex core protein 2)	Uqcrc2	453	48235	49	14
Q8BJ82	Putative uncharacterized protein	Armcx2	784	80987	8	4
B2RXX9	Myosin, heavy polypeptide 7, cardiac muscle, beta (Myosin-7)	Myh7	1935	222877	68	27
A2A8R7	Terminal uridylyltransferase 4	Zcchc11	1648	185125	9	8
A2API5	Low-density lipoprotein receptor-related protein 1B	Lrp1b	4599	513578	5	13
V9GXP8	ELKS/Rab6-interacting/CAST family member 1 (Rab6 interacting protein 2, isoform CRA_b)	Erc1 Rab6ip2 mCG_131716	1116	127942	12	7
Q8CBF3	Ephrin type-B receptor 1 (EC 2.7.10.1)	Ephb1	984	109881	5	2
D3Z0M9	MCG18410, isoform CRA_a (Protein Ddx23)	Ddx23 mCG_18410	819	95495	32	13
Q14AX6	Cyclin-dependent kinase 12 (EC 2.7.11.22) (EC 2.7.11.23) (Cdc2-related kinase, arginine/serine-rich) (CrkRS) (Cell division cycle 2-related protein kinase 7) (CDC2-related protein kinase 7) (Cell division protein kinase 12)	Cdk12 Crk7 Crkrs Kiaa0904	1484	163680	14	3
Q6P8J7	Creatine kinase S-type, mitochondrial (EC 2.7.3.2) (Basic-type mitochondrial creatine kinase) (Mib-CK) (Sarcomeric mitochondrial creatine kinase) (S-MtCK)	Ckmt2	419	47473	49	11
O70468	Myosin-binding protein C, cardiac-type (Cardiac MyBP-C) (C-protein, cardiac muscle isoform)	Mybpc3	1270	140632	53	27
E9QNY8	Sacsin	Sacs	4582	520697	4	8
F7CR78	Titin (Fragment)	Ttn	8272	914024	4	15
A2ARZ3	Fibrous sheath-interacting protein 2	Fsip2	6995	784873	4	12
Q925I1	ATPase family AAA domain-containing protein 3 (AAA-ATPase TOB3)	Atad3 Atad3a Kiaa1273	591	66742	6	1
Q8BMF4	Dihydrolipoyllysine-residue acetyltransferase component of pyruvate dehydrogenase complex, mitochondrial (EC 2.3.1.12) (Dihydrolipoamide acetyltransferase component of pyruvate dehydrogenase complex) (Pyruvate dehydrogenase complex component E2) (PDC-E2) (PDCE2)	Dlat	642	67942	51	30
P60879	Synaptosomal-associated protein 25 (SNAP-25) (Super protein) (SUP) (Synaptosomal-associated 25 kDa protein)	Snap25 Snap	206	23315	12	1
A0A509	MCG4625 (Myotilin)	Myot mCG_4625	496	55316	14	3
E9PVB3	Coiled-coil domain-containing protein 175	Ccdc175	822	97122	28	10
Q8CIR4	Transient receptor potential cation channel subfamily M member 6 (EC 2.7.11.1) (Channel kinase 2) (Melastatin-related TRP cation channel 6)	Trpm6	2028	232887	8	7
E9Q6J5	Biorientation of chromosomes in cell division protein 1-like 1	Bod1l Kiaa1327	3032	327453	14	25
B2RRI2	Protein strawberry notch homolog 1 (Sbno1 protein)	Sbno1	1391	153922	8	4
E9Q1Y3	Apolipoprotein B-100 (Fragment)	Apob	4456	503910	9	14
O88990	Alpha-actinin-3 (Alpha-actinin skeletal muscle isoform 3) (F-actin cross-linking protein)	Actn3	900	103043	59	31
Q8CJ27	Abnormal spindle-like microcephaly-associated protein homolog (Calmodulin-binding protein Sha1) (Calmodulin-binding protein 1) (Spindle and hydroxyurea checkpoint abnormal protein)	Aspm Calmbp1 Sha1	3122	364218	11	14
Q8C5E7	Putative uncharacterized protein	Snx5	404	46798	7	1
P55200	Histone-lysine N-methyltransferase 2A (Lysine N-methyltransferase 2A) (EC 2.1.1.43) (ALL-1) (Myeloid/lymphoid or mixed-lineage leukemia) (Myeloid/lymphoid or mixed-lineage leukemia protein 1) (Zinc finger protein HRX) [Cleaved into: MLL cleavage product N320 (N-terminal cleavage product of 320 kDa) (p320); MLL cleavage product C180 (C-terminal cleavage product of 180 kDa) (p180)]	Kmt2a All1 Hrx Mll Mll1	3966	429653	15	31
Q3V0Q1	Dynein heavy chain 12, axonemal (Axonemal beta dynein heavy chain 12) (Axonemal dynein heavy chain 12-like protein) (Axonemal dynein heavy chain 7-like protein) (Ciliary dynein heavy chain 12)	Dnah12 Dnah12l Dnah7l Dnahc12 Dnahc7l	3086	356231	8	10
F8VPV0	Pericentrin	Pcnt	2916	331337	22	34
L0HN04	Methylcytosine dioxygenase TET3 (TET3 isoform 1) (Tet methylcytosine deoxygenase 3 isoform) (EC 1.14.11.n2)	Tet3	1803	194790	7	6
P04117	Fatty acid-binding protein, adipocyte (3T3-L1 lipid-binding protein) (Adipocyte lipid-binding protein) (ALBP) (Adipocyte-type fatty acid-binding protein) (A-FABP) (AFABP) (Fatty acid-binding protein 4) (Myelin P2 protein homolog) (P15) (P2 adipocyte protein) (Protein 422)	Fabp4 Ap2	132	14650	22	2
F8VQ05	Protein Fryl	Fryl	3007	337819	38	55
Q3UGZ4	Putative uncharacterized protein	Sptbn2 Spnb3	2388	270933	10	10
A0A087WNL7	Protein Srcap	Srcap	3210	343258	21	58
B1AR69	Protein Myh13	Myh13	1938	223559	63	56
Q07563-2	Collagen alpha-1(XVII) chain (180 kDa bullous pemphigoid antigen 2) (Bullous pemphigoid antigen 2) [Cleaved into: 120 kDa linear IgA disease antigen homolog]	Col17a1 Bp180 Bpag2	1470	144140	39	39
B2RUK2	Erbb2 interacting protein	Erbb2ip	1450	162182	39	44
A0A0A0MQ73	Histone-lysine N-methyltransferase 2D	Kmt2d	5588	600311	6	14
E9QP46	Nesprin-2	Syne2	6870	782157	14	45
S4R1P5	Dystonin	Dst	7717	870551	9	27
Q91XQ0-2	Dynein heavy chain 8, axonemal (Axonemal beta dynein heavy chain 8) (Ciliary dynein heavy chain 8)	Dnah8 Dnahc8	4731	480158	27	66
B1ART1	Protein Vps13d	Vps13d	4359	487333	7	13
E9Q7P1	Protein Col22a1	Col22a1	1613	159942	34	35
Q6GQV8	Cytospin A	Specc1l Cytsa	1028	115704	17	9
P11087	Collagen alpha-1(I) chain (Alpha-1 type I collagen)	Col1a1 Cola1	1453	138033	60	48
E9Q804	Ankyrin repeat domain-containing protein 17	Ankrd17	2602	274140	38	64
A2ASS6-3	Titin (EC 2.7.11.1) (Connectin)	Ttn	35213	619342	38	134
B2RTE7	Kelch-like 17 (Drosophila) (Kelch-like 17 (Drosophila), isoform CRA_a) (Kelch-like protein 17)	Klhl17 mCG_132182	640	69732	8	1
Q91XM9-7	Disks large homolog 2 (Channel-associated protein of synapse-110) (Chapsyn-110) (Postsynaptic density protein PSD-93)	Dlg2 Dlgh2	852	109239	3	1
Q3UJZ7	Putative uncharacterized protein	Nop56 Nol5a	580	64587	8	1
A6ZI47	Fructose-bisphosphate aldolase (EC 4.1.2.13)	Aldoart2	364	39371	27	1
D6RI32	Myotonin-protein kinase	Dmpk	588	65582	7	1
Q3UHP6	Ankyrin repeat and SAM domain-containing protein 1A	Anks1	1189	129565	2	1
Q69ZT1-2	Fanconi-associated nuclease 1 (EC 3.1.21.-) (EC 3.1.4.1) (FANCD2/FANCI-associated nuclease 1) (mFAN1) (Myotubularin-related protein 15)	Fan1 Kiaa1018 Mtmr15	1020	82316	5	1
Q71FD5	E3 ubiquitin-protein ligase ZNRF2 (EC 6.3.2.-) (Zinc/RING finger protein 2)	Znrf2	238	23705	8	1
E9PZ11	Protein Zfp651	Zfp651	729	80787	3	1
A3KMF2	Mkl2 protein (Fragment)	Mkl2	1079	117419	5	2
Q6ZQI7	MKIAA0131 protein (Fragment)	mKIAA0131	935	104154	13	1
Q504P4	Heat shock cognate 71 kDa protein (Hspa8 protein)	Hspa8	627	68779	33	1
Q3V1F1	MCG125471 (Predicted gene, 677156) (Protein Cyp4f37)	Cyp4f37 677156 Cyp4f16 EG623748 Gm9705 mCG_125471	546	62565	13	1
B8JK39	Integrin alpha-9	Itga9	1036	114416	5	1
E9Q7C0	Protein 1700030K09Rik	1700030K09Rik	607	65422	6	2
Q8BSD5	SH2 domain-containing adapter protein E	She	492	53353	7	1
P05064	Fructose-bisphosphate aldolase A (EC 4.1.2.13) (Aldolase 1) (Muscle-type aldolase)	Aldoa Aldo1	364	39356	40	1
Q80VA0	N-acetylgalactosaminyltransferase 7 (EC 2.4.1.-) (Polypeptide GalNAc transferase 7) (GalNAc-T7) (pp-GaNTase 7) (Protein-UDP acetylgalactosaminyltransferase 7) (UDP-GalNAc:polypeptide N-acetylgalactosaminyltransferase 7)	Galnt7	657	75419	9	3
F6RDI8	Protein Srsf11 (Fragment)	Srsf11	500	55846	3	1
A8Y5N4	17-beta-hydroxysteroid dehydrogenase 13	Hsd17b13	264	29425	13	2
