# Supplementary material for: Cardiac Proteome Profiling in Ischemic and Dilated Cardiomyopathy Mouse Models
Source: PubMed Central journal article supplement (PMC6591471; doi:10.3389/fphys.2019.00750), 2019-06-18
Supplement: Table_1.pdf [file Table_1.pdf]

**Supplementary Table S1.** List of the differentially expressed proteins identified by proteomics. Fold change was calculated as a ratio of relative protein abundance. Protein expression was regarded as up-regulated when fold change > 1.5, and down-regulated when fold change < 0.67. (NC, control group; DCM, dilated cardiomyopathy; ICM, ischemic cardiomyopathy.)

| Accession | Protein names | Protein annotations                                                                                                                                              | NC                         | DCM                        |                   |                  | ICM                        |                   |                  |                    |                   |
|-----------|---------------|------------------------------------------------------------------------------------------------------------------------------------------------------------------|----------------------------|----------------------------|-------------------|------------------|----------------------------|-------------------|------------------|--------------------|-------------------|
|           |               |                                                                                                                                                                  | Relative protein abundance | Relative protein abundance | Fold change vs NC | Regulation vs NC | Relative protein abundance | Fold change vs NC | Regulation vs NC | Fold change vs DCM | Regulation vs DCM |
| P51667    | MLRV          | Myosin regulatory light chain 2, ventricular/cardiac muscle isoform (MLC-2) (MLC-2v) (Myosin light chain 2, slow skeletal/ventricular muscle isoform) (MLC-2s/v) | 1020000                    | 667000                     | 0.65              | Down             | 666000                     | 0.65              | Down             | 1.00               | -                 |
| P23927    | CRYAB         | Alpha-crystallin B chain (Alpha(B)-crystallin) (P23)                                                                                                             | 395000                     | 554000                     | 1.40              | -                | 681000                     | 1.72              | Up               | 1.23               | -                 |
| F8WID5    | F8WID5        | Tropomyosin alpha-1 chain                                                                                                                                        | 17500                      | 37000                      | 2.11              | Up               | 34600                      | 1.98              | Up               | 0.94               | -                 |
| P02088    | HBB1          | Hemoglobin subunit beta-1 (Beta-1-globin)                                                                                                                        | 2740                       | 6970                       | 2.54              | Up               | 6920                       | 2.53              | Up               | 0.99               | -                 |
| Q9D3D9    | ATPD          | (Hemoglobin beta-1 chain) (Hemoglobin beta-major chain)                                                                                                          | 23500                      | 25000                      | 1.06              | -                | 49200                      | 2.09              | Up               | 1.97               | Up                |
| Q9CR61    | NDUB7         | ATP synthase subunit delta, mitochondrial (ATP synthase F1 subunit delta) (F-ATPase delta subunit)                                                               | 90800                      | 124000                     | 1.37              | -                | 146000                     | 1.61              | Up               | 1.18               | -                 |
| P21550    | ENOB          | NADH dehydrogenase [ubiquinone] 1 beta subcomplex subunit 7 (Complex I-B18) (CI-B18) (NADH-ubiquinone oxidoreductase B18 subunit)                                | 119000                     | 136000                     | 1.14              | -                | 90600                      | 0.76              | -                | 0.67               | Down              |
| P01942    | HBA           | Beta-enolase (EC 4.2.1.11) (2-phospho-D-glycerate hydro-lyase) (Enolase 3) (Muscle-specific enolase) (MSE) (Skeletal muscle enolase)                             | 44000                      | 35000                      | 0.80              | -                | 137000                     | 3.11              | Up               | 3.91               | Up                |
| P07759    | SPA3K         | Hemoglobin subunit alpha (Alpha-globin) (Hemoglobin alpha chain)                                                                                                 | 63200                      | 106000                     | 1.68              | Up               | 103000                     | 1.63              | Up               | 0.97               | -                 |
| P68134    | ACTS          | Serine protease inhibitor A3K (Serpin A3K) (Contrapsin) (SPI-2)                                                                                                  | 44700                      | 34800                      | 0.78              | -                | 16700                      | 0.37              | Down             | 0.48               | Down              |

|                |                |                                                                                                                                                                                                                              |        |       |      |      |        |      |      |      |    |
|----------------|----------------|------------------------------------------------------------------------------------------------------------------------------------------------------------------------------------------------------------------------------|--------|-------|------|------|--------|------|------|------|----|
| A0A1D5R<br>LD8 | A0A1D5<br>RLD8 | into: Actin, alpha skeletal muscle, intermediate form]<br>Glyceraldehyde-3-phosphate dehydrogenase (EC<br>1.2.1.12)                                                                                                          | 17900  | 16400 | 0.92 | -    | 34400  | 1.92 | Up   | 2.10 | Up |
| Q9R0Y5         | KAD1           | Adenylate kinase isoenzyme 1 (AK 1) (EC 2.7.4.3) (EC<br>2.7.4.6) (ATP-AMP transphosphorylase 1) (ATP:AMP<br>phosphotransferase) (Adenylate monophosphate<br>kinase) (Myokinase)                                              | 11400  | 9500  | 0.83 | -    | 15100  | 1.32 | -    | 1.59 | Up |
| Q8K3J1         | NDUS8          | NADH dehydrogenase [ubiquinone] iron-sulfur protein<br>8, mitochondrial (EC 1.6.99.3) (EC 7.1.1.2) (Complex<br>I-23kD) (CI-23kD) (NADH-ubiquinone oxidoreductase<br>23 kDa subunit)                                          | 531    | 1230  | 2.32 | Up   | 1100   | 2.07 | Up   | 0.89 | -  |
| Q60931         | VDAC3          | Voltage-dependent anion-selective channel protein 3<br>(VDAC-3) (mVDAC3) (Outer mitochondrial<br>membrane protein porin 3)                                                                                                   | 10700  | 5420  | 0.51 | Down | 6620   | 0.62 | Down | 1.22 | -  |
| P10854         | H2B1M          | Histone H2B type 1-M (H2B 291B)                                                                                                                                                                                              | 14900  | 27700 | 1.86 | Up   | 39400  | 2.64 | Up   | 1.42 | -  |
| P60710         | ACTB           | Actin, cytoplasmic 1 (Beta-actin) [Cleaved into: Actin,<br>cytoplasmic 1, N-terminally processed]                                                                                                                            | 2630   | 1300  | 0.49 | Down | 1040   | 0.40 | Down | 0.80 | -  |
| Q8BMS1         | ECHA           | Trifunctional enzyme subunit alpha, mitochondrial (TP-<br>alpha) [Includes: Long-chain enoyl-CoA hydratase (EC<br>4.2.1.17); Long chain 3-hydroxyacyl-CoA<br>dehydrogenase (EC 1.1.1.211)]                                   | 118000 | 58700 | 0.50 | Down | 71400  | 0.61 | Down | 1.22 | -  |
| P14602         | HSPB1          | Heat shock protein beta-1 (HspB1) (Growth-related 25<br>kDa protein) (Heat shock 25 kDa protein) (HSP 25)<br>(Heat shock 27 kDa protein) (HSP 27) (p25)                                                                      | 51400  | 69000 | 1.34 | -    | 107000 | 2.08 | Up   | 1.55 | Up |
| Q8R5L1         | Q8R5L1         | Complement component 1 Q subcomponent-binding<br>protein, mitochondrial (Complement component 1, q<br>subcomponent binding protein) (Complement<br>component 1, q subcomponent binding protein, isoform<br>CRA_b) (p32-RACK) | 5000   | 7430  | 1.49 | -    | 11900  | 2.38 | Up   | 1.60 | Up |
| Q9D0K2         | SCOT1          | Succinyl-CoA:3-ketoacid coenzyme A transferase 1,                                                                                                                                                                            | 34700  | 28600 | 0.82 | -    | 22500  | 0.65 | Down | 0.79 | -  |

|             |             |                                                                                                                                                  |        |        |      |      |        |      |      |      |      |
|-------------|-------------|--------------------------------------------------------------------------------------------------------------------------------------------------|--------|--------|------|------|--------|------|------|------|------|
|             |             | mitochondrial (EC 2.8.3.5) (3-oxoacid CoA-transferase 1) (Somatic-type succinyl-CoA:3-oxoacid CoA-transferase) (SCOT-s)                          |        |        |      |      |        |      |      |      |      |
| Q99LC5      | ETFA        | Electron transfer flavoprotein subunit alpha, mitochondrial (Alpha-ETF)                                                                          | 118000 | 79900  | 0.68 | -    | 67600  | 0.57 | Down | 0.85 | -    |
| Q8BUJ6      | Q8BUJ6      | Titin (Fragment)                                                                                                                                 | 99000  | 124000 | 1.25 | -    | 165000 | 1.67 | Up   | 1.33 | -    |
| Q9CZ19      | Q9CZ19      | Myosin light chain 4 (Myosin, light polypeptide 4)                                                                                               | 6730   | 26800  | 3.98 | Up   | 30800  | 4.58 | Up   | 1.15 | -    |
| P20108      | PRDX3       | Thioredoxin-dependent peroxide reductase, mitochondrial (EC 1.11.1.15) (Antioxidant protein 1) (AOP-1) (PRX III) (Perioredoxin-3) (Protein MER5) | 134000 | 77900  | 0.58 | Down | 56500  | 0.42 | Down | 0.73 | -    |
| P13541      | MYH3        | Myosin-3 (Myosin heavy chain 3)                                                                                                                  | 166    | 274    | 1.65 | Up   | 408    | 2.46 | Up   | 1.49 | Up   |
| Q99KI0      | ACON        | Aconitate hydratase, mitochondrial (Aconitase) (EC 4.2.1.3) (Citrate hydro-lyase)                                                                | 32700  | 17700  | 0.54 | Down | 19200  | 0.59 | Down | 1.08 | -    |
| P19123      | TNNC1       | Troponin C, slow skeletal and cardiac muscles (TN-C)                                                                                             | 42900  | 24100  | 0.56 | Down | 24500  | 0.57 | Down | 1.02 | -    |
| P50544      | ACADV       | Very long-chain specific acyl-CoA dehydrogenase, mitochondrial (EC 1.3.8.9) (MVLCAD) (VLCAD)                                                     | 122000 | 92700  | 0.76 | -    | 79400  | 0.65 | Down | 0.86 | -    |
| P14211      | CALR        | Calreticulin (CRP55) (Calregulin) (Endoplasmic reticulum resident protein 60) (ERp60) (HACBP)                                                    | 19100  | 28100  | 1.47 | -    | 29900  | 1.57 | Up   | 1.06 | -    |
| B1AR69      | B1AR69      | Myosin, heavy polypeptide 13, skeletal muscle                                                                                                    | 874    | 528    | 0.60 | Down | 317    | 0.36 | Down | 0.60 | Down |
| P35385      | HSPB7       | Heat shock protein beta-7 (HspB7) (Cardiovascular heat shock protein) (cvHsp) (Heat shock protein 25 kDa 2) (Protein p19/6.8)                    | 2610   | 2200   | 0.84 | -    | 3760   | 1.44 | -    | 1.71 | Up   |
| Q8CGP7      | H2A1K       | Histone H2A type 1-K                                                                                                                             | 36300  | 153000 | 4.21 | Up   | 102000 | 2.81 | Up   | 0.67 | Down |
| A0A0R4J083  | A0A0R4J083  | Long-chain-specific acyl-CoA dehydrogenase, mitochondrial                                                                                        | 91100  | 66500  | 0.73 | -    | 55700  | 0.61 | Down | 0.84 | -    |
| A0A0N4S VQ1 | A0A0N4S VQ1 | Cytochrome c oxidase subunit NDUFA4                                                                                                              | 215000 | 270000 | 1.26 | -    | 510000 | 2.37 | Up   | 1.89 | Up   |
| Q9ERS2      | NDUAD       | NADH dehydrogenase [ubiquinone] 1 alpha subcomplex subunit 13 (Cell death regulatory protein GRIM-19) (Complex I-B16.6) (CI-B16.6) (Gene         | 45200  | 64200  | 1.42 | -    | 78700  | 1.74 | Up   | 1.23 | -    |

|        |        |                                                                                                                                                                                                              |        |        |      |      |        |      |      |      |      |
|--------|--------|--------------------------------------------------------------------------------------------------------------------------------------------------------------------------------------------------------------|--------|--------|------|------|--------|------|------|------|------|
|        |        | associated with retinoic and interferon-induced mortality 19 protein) (GRIM-19) (Gene associated with retinoic and IFN-induced mortality 19 protein)                                                         |        |        |      |      |        |      |      |      |      |
|        |        | (NADH-ubiquinone oxidoreductase B16.6 subunit)                                                                                                                                                               |        |        |      |      |        |      |      |      |      |
| Q60605 | MYL6   | Myosin light polypeptide 6 (17 kDa myosin light chain) (LC17) (Myosin light chain 3) (MLC-3) (Myosin light chain alkali 3) (Myosin light chain A3) (Smooth muscle and nonmuscle myosin light chain alkali 6) | 3990   | 7010   | 1.76 | Up   | 8480   | 2.13 | Up   | 1.21 | -    |
| P35486 | ODPA   | Pyruvate dehydrogenase E1 component subunit alpha, somatic form, mitochondrial (EC 1.2.4.1) (PDHE1-A type I)                                                                                                 | 24700  | 17800  | 0.72 | -    | 15600  | 0.63 | Down | 0.88 | -    |
| G5E902 | G5E902 | MCG10343, isoform CRA_b (Phosphate carrier protein, mitochondrial)                                                                                                                                           | 20400  | 14700  | 0.72 | -    | 54800  | 2.69 | Up   | 3.73 | Up   |
| P54071 | IDHP   | Isocitrate dehydrogenase [NADP], mitochondrial (IDH) (EC 1.1.1.42) (ICD-M) (IDP) (NADP(+)-specific ICDH) (Oxalosuccinate decarboxylase)                                                                      | 244000 | 163000 | 0.67 | Down | 131000 | 0.54 | Down | 0.80 | -    |
| P11531 | DMD    | Dystrophin                                                                                                                                                                                                   | 19600  | 32400  | 1.65 | Up   | 33600  | 1.71 | Up   | 1.04 | -    |
| Q91WD5 | NDUS2  | NADH dehydrogenase [ubiquinone] iron-sulfur protein 2, mitochondrial (EC 1.6.99.3) (EC 7.1.1.2) (Complex I-49kD) (CI-49kD) (NADH-ubiquinone oxidoreductase 49 kDa subunit)                                   | 32200  | 20800  | 0.65 | Down | 20300  | 0.63 | Down | 0.98 | -    |
| P70670 | NACAM  | Nascent polypeptide-associated complex subunit alpha, muscle-specific form (Alpha-NAC, muscle-specific form) (skNAC)                                                                                         | 16300  | 27500  | 1.69 | Up   | 25200  | 1.55 | Up   | 0.92 | -    |
| P48962 | ADT1   | ADP/ATP translocase 1 (ADP,ATP carrier protein 1) (ADP,ATP carrier protein, heart/skeletal muscle isoform T1) (Adenine nucleotide translocator 1) (ANT 1) (Solute carrier family 25 member 4) (mANC1)        | 55200  | 46900  | 0.85 | -    | 122000 | 2.21 | Up   | 2.60 | Up   |
| H3BJQ7 | H3BJQ7 | Peroxisredoxin-5, mitochondrial                                                                                                                                                                              | 36000  | 36600  | 1.02 | -    | 24200  | 0.67 | -    | 0.66 | Down |
| Q9DCS9 | NDUBA  | NADH dehydrogenase [ubiquinone] 1 beta subcomplex                                                                                                                                                            | 187000 | 126000 | 0.67 | -    | 121000 | 0.65 | Down | 0.96 | -    |

|        |        |                                                                                                                                                                                                 |        |       |      |      |       |       |      |      |      |
|--------|--------|-------------------------------------------------------------------------------------------------------------------------------------------------------------------------------------------------|--------|-------|------|------|-------|-------|------|------|------|
|        |        | subunit 10 (Complex I-PDSW) (CI-PDSW) (NADH-ubiquinone oxidoreductase PDSW subunit)                                                                                                             |        |       |      |      |       |       |      |      |      |
| P56565 | S10A1  | Protein S100-A1 (S-100 protein alpha chain) (S-100 protein subunit alpha) (S100 calcium-binding protein A1)                                                                                     | 112000 | 36800 | 0.33 | Down | 25400 | 0.23  | Down | 0.69 | -    |
| Q8CI94 | PYGB   | Glycogen phosphorylase, brain form (EC 2.4.1.1)                                                                                                                                                 | 30600  | 17400 | 0.57 | Down | 18000 | 0.59  | Down | 1.03 | -    |
| Q9Z2I9 | SUCB1  | Succinate--CoA ligase [ADP-forming] subunit beta, mitochondrial (EC 6.2.1.5) (ATP-specific succinyl-CoA synthetase subunit beta) (A-SCS) (Succinyl-CoA synthetase beta-A chain) (SCS-betaA)     | 41600  | 31300 | 0.75 | -    | 26700 | 0.64  | Down | 0.85 | -    |
| P62082 | RS7    | 40S ribosomal protein S7                                                                                                                                                                        | 36600  | 65800 | 1.80 | Up   | 80500 | 2.20  | Up   | 1.22 | -    |
| P09671 | SODM   | Superoxide dismutase [Mn], mitochondrial (EC 1.15.1.1)                                                                                                                                          | 11600  | 8410  | 0.73 | -    | 7320  | 0.63  | Down | 0.87 | -    |
| P0DP28 | CALM3  | Calmodulin-3                                                                                                                                                                                    | 6440   | 15100 | 2.34 | Up   | 8600  | 1.34  | -    | 0.57 | Down |
| P06745 | G6PI   | Glucose-6-phosphate isomerase (GPI) (EC 5.3.1.9) (Autocrine motility factor) (AMF) (Neuroleukin) (NLK) (Phosphoglucose isomerase) (PGI) (Phosphohexose isomerase) (PHI)                         | 7290   | 3050  | 0.42 | Down | 3080  | 0.42  | Down | 1.01 | -    |
| P51881 | ADT2   | ADP/ATP translocase 2 (ADP,ATP carrier protein 2) (Adenine nucleotide translocator 2) (ANT 2) (Solute carrier family 25 member 5) [Cleaved into: ADP/ATP translocase 2, N-terminally processed] | 31400  | 19400 | 0.62 | Down | 38300 | 1.22  | -    | 1.97 | Up   |
| B7FAV1 | B7FAV1 | Filamin, alpha (Filamin-A) (Fragment)                                                                                                                                                           | 9200   | 11400 | 1.24 | -    | 14000 | 1.52  | Up   | 1.23 | -    |
| Q9QVP4 | MLRA   | Myosin regulatory light chain 2, atrial isoform (MLC-2a) (MLC2a) (Myosin light chain 2a) (Myosin regulatory light chain 7)                                                                      | 3930   | 21600 | 5.50 | Up   | 57500 | 14.63 | Up   | 2.66 | Up   |
| Q3UIU2 | NDUB6  | NADH dehydrogenase [ubiquinone] 1 beta subcomplex subunit 6 (Complex I-B17) (CI-B17) (NADH-ubiquinone oxidoreductase B17 subunit)                                                               | 6330   | 14400 | 2.27 | Up   | 20200 | 3.19  | Up   | 1.40 | -    |
| Q9WTR5 | CAD13  | Cadherin-13 (Heart cadherin) (H-cadherin) (Truncated                                                                                                                                            | 5710   | 7070  | 1.24 | -    | 9370  | 1.64  | Up   | 1.33 | -    |

|        |        |                                                                                                                                                                                                                                                                        |        |        |      |      |        |      |      |      |      |
|--------|--------|------------------------------------------------------------------------------------------------------------------------------------------------------------------------------------------------------------------------------------------------------------------------|--------|--------|------|------|--------|------|------|------|------|
|        |        | cadherin) (T-cad) (T-cadherin)                                                                                                                                                                                                                                         |        |        |      |      |        |      |      |      |      |
| P19536 | COX5B  | Cytochrome c oxidase subunit 5B, mitochondrial (Cytochrome c oxidase polypeptide Vb)                                                                                                                                                                                   | 2760   | 6170   | 2.24 | Up   | 6140   | 2.22 | Up   | 1.00 | -    |
| P31786 | ACBP   | Acyl-CoA-binding protein (ACBP) (Diazepam-binding inhibitor) (DBI) (Endozepine) (EP)                                                                                                                                                                                   | 1950   | 3260   | 1.67 | Up   | 1630   | 0.84 | -    | 0.50 | Down |
| A2AQP0 | MYH7B  | Myosin-7B (Myosin cardiac muscle beta chain) (Myosin heavy chain 7B, cardiac muscle beta isoform)                                                                                                                                                                      | 1130   | 1570   | 1.39 | -    | 1990   | 1.76 | Up   | 1.27 | -    |
| P62806 | H4     | Histone H4                                                                                                                                                                                                                                                             | 18700  | 19700  | 1.05 | -    | 32900  | 1.76 | Up   | 1.67 | Up   |
| Q91VD9 | NDUS1  | NADH-ubiquinone oxidoreductase 75 kDa subunit, mitochondrial (EC 1.6.99.3) (EC 7.1.1.2) (Complex I-75kD) (CI-75kD)                                                                                                                                                     | 18600  | 9560   | 0.51 | Down | 10200  | 0.55 | Down | 1.07 | -    |
| P63242 | IF5A1  | Eukaryotic translation initiation factor 5A-1 (eIF-5A-1) (eIF-5A1) (Eukaryotic initiation factor 5A isoform 1) (eIF-5A) (eIF-4D)                                                                                                                                       | 1900   | 1590   | 0.84 | -    | 7770   | 4.09 | Up   | 4.89 | Up   |
| Q8BMF4 | ODP2   | Dihydrolipoyllysine-residue acetyltransferase component of pyruvate dehydrogenase complex, mitochondrial (EC 2.3.1.12) (Dihydrolipoamide acetyltransferase component of pyruvate dehydrogenase complex) (Pyruvate dehydrogenase complex component E2) (PDC-E2) (PDCE2) | 103000 | 102000 | 0.99 | -    | 64200  | 0.62 | Down | 0.63 | Down |
| Q9CQH3 | NDUB5  | NADH dehydrogenase [ubiquinone] 1 beta subcomplex subunit 5, mitochondrial (Complex I-SGDH) (CI-SGDH) (NADH-ubiquinone oxidoreductase SGD subunit)                                                                                                                     | 96300  | 137000 | 1.42 | -    | 191000 | 1.98 | Up   | 1.39 | -    |
| J3QP71 | J3QP71 | Basigin (Fragment)                                                                                                                                                                                                                                                     | 35200  | 28800  | 0.82 | -    | 19700  | 0.56 | Down | 0.68 | -    |
| O88569 | ROA2   | Heterogeneous nuclear ribonucleoproteins A2/B1 (hnRNP A2/B1)                                                                                                                                                                                                           | 12000  | 19500  | 1.63 | Up   | 25300  | 2.11 | Up   | 1.30 | -    |
| Q9JHI5 | IVD    | Isovaleryl-CoA dehydrogenase, mitochondrial (IVD) (EC 1.3.8.4)                                                                                                                                                                                                         | 14500  | 12100  | 0.83 | -    | 8580   | 0.59 | Down | 0.71 | -    |
| A2A838 | A2A838 | Protein 4.1 (Fragment)                                                                                                                                                                                                                                                 | 422    | 653    | 1.55 | Up   | 649    | 1.54 | Up   | 0.99 | -    |

|                |                |                                                                                                                                                                                |       |       |      |      |       |       |      |      |      |
|----------------|----------------|--------------------------------------------------------------------------------------------------------------------------------------------------------------------------------|-------|-------|------|------|-------|-------|------|------|------|
| Q80XN0         | BDH            | D-beta-hydroxybutyrate dehydrogenase, mitochondrial (EC 1.1.1.30) (3-hydroxybutyrate dehydrogenase) (BDH)                                                                      | 17100 | 9910  | 0.58 | Down | 11200 | 0.65  | Down | 1.13 | -    |
| E9Q401         | RYR2           | Ryanodine receptor 2 (RYR-2) (RyR2) (Cardiac muscle ryanodine receptor) (Cardiac muscle ryanodine receptor-calcium release channel) (Type 2 ryanodine receptor)                | 4070  | 2570  | 0.63 | Down | 4200  | 1.03  | -    | 1.63 | Up   |
| P19324         | SERPH          | Serpin H1 (47 kDa heat shock protein) (Collagen-binding protein) (Colligin) (Serine protease inhibitor J6)                                                                     | 19900 | 31200 | 1.57 | Up   | 33600 | 1.69  | Up   | 1.08 | -    |
| Q99N15         | Q99N15         | 17beta-hydroxysteroid dehydrogenase type 10/short chain L-3-hydroxyacyl-CoA dehydrogenase (3-hydroxyacyl-CoA dehydrogenase type-2) (Hydroxysteroid (17-beta) dehydrogenase 10) | 22000 | 13300 | 0.60 | Down | 11300 | 0.51  | Down | 0.85 | -    |
| Q9JHJ0         | TMOD3          | Tropomodulin-3 (Ubiquitous tropomodulin) (U-Tmod)                                                                                                                              | 12600 | 20200 | 1.60 | Up   | 19700 | 1.56  | Up   | 0.98 | -    |
| P10922         | H10            | Histone H1.0 (Histone H1') (Histone H1(0)) (MyD196) [Cleaved into: Histone H1.0, N-terminally processed]                                                                       | 4410  | 19900 | 4.51 | Up   | 52300 | 11.86 | Up   | 2.63 | Up   |
| P97443         | SMYD1          | Histone-lysine N-methyltransferase Smyd1 (EC 2.1.1.43) (CD8b-opposite) (SET and MYND domain-containing protein 1) (Zinc finger protein BOP) (m-BOP)                            | 13700 | 15300 | 1.12 | -    | 8660  | 0.63  | Down | 0.57 | Down |
| E9PV24         | FIBA           | Fibrinogen alpha chain [Cleaved into: Fibrinopeptide A; Fibrinogen alpha chain]                                                                                                | 38300 | 65100 | 1.70 | Up   | 42400 | 1.11  | -    | 0.65 | Down |
| A0A0G2J<br>DZ4 | A0A0G2J<br>DZ4 | Myosin regulatory light chain 10                                                                                                                                               | 385   | 849   | 2.20 | Up   | 607   | 1.58  | Up   | 0.71 | -    |
| P14733         | LMNB1          | Lamin-B1                                                                                                                                                                       | 21500 | 23800 | 1.11 | -    | 15500 | 0.72  | -    | 0.65 | Down |
| O35887         | CALU           | Calumenin (Crocabin)                                                                                                                                                           | 3810  | 8190  | 2.15 | Up   | 7730  | 2.03  | Up   | 0.94 | -    |
| Q9WV35         | ABEC2          | C->U-editing enzyme APOBEC-2 (EC 3.5.4.36) (mRNA(cytosine(6666)) deaminase 2)                                                                                                  | 11000 | 4950  | 0.45 | Down | 4500  | 0.41  | Down | 0.91 | -    |
| Q9CRB8         | MTFP1          | Mitochondrial fission process protein 1 (Mitochondrial                                                                                                                         | 41400 | 32800 | 0.79 | -    | 50700 | 1.22  | -    | 1.55 | Up   |

|            |            |                                                                                                                                                                                                                            |       |       |      |      |       |      |      |      |    |
|------------|------------|----------------------------------------------------------------------------------------------------------------------------------------------------------------------------------------------------------------------------|-------|-------|------|------|-------|------|------|------|----|
|            |            | 18 kDa protein) (MTP18)                                                                                                                                                                                                    |       |       |      |      |       |      |      |      |    |
| P51125     | ICAL       | Calpastatin (Calpain inhibitor)                                                                                                                                                                                            | 12000 | 25100 | 2.09 | Up   | 19100 | 1.59 | Up   | 0.76 | -  |
| P62631     | EF1A2      | Elongation factor 1-alpha 2 (EF-1-alpha-2) (Eukaryotic elongation factor 1 A-2) (eEF1A-2) (Statin-S1)                                                                                                                      | 7600  | 2500  | 0.33 | Down | 3200  | 0.42 | Down | 1.28 | -  |
| A2BE93     | A2BE93     | Protein SET (Fragment)                                                                                                                                                                                                     | 13900 | 27700 | 1.99 | Up   | 23400 | 1.68 | Up   | 0.84 | -  |
| Q9CQC7     | NDUB4      | NADH dehydrogenase [ubiquinone] 1 beta subcomplex subunit 4 (Complex I-B15) (CI-B15) (NADH-ubiquinone oxidoreductase B15 subunit)                                                                                          | 9960  | 19500 | 1.96 | Up   | 27500 | 2.76 | Up   | 1.41 | -  |
| Q9EQ20     | MMSA       | Methylmalonate-semialdehyde dehydrogenase [acylating], mitochondrial (MMSDH) (Malonate-semialdehyde dehydrogenase [acylating]) (EC 1.2.1.18) (EC 1.2.1.27) (Aldehyde dehydrogenase family 6 member A1)                     | 13200 | 8600  | 0.65 | Down | 8460  | 0.64 | Down | 0.98 | -  |
| A0A0R4J1E2 | A0A0R4J1E2 | Elongation factor 1-delta                                                                                                                                                                                                  | 589   | 770   | 1.31 | -    | 908   | 1.54 | Up   | 1.18 | -  |
| Q9CQ69     | QCR8       | Cytochrome b-c1 complex subunit 8 (Complex III subunit 8) (Complex III subunit VIII) (Ubiquinol-cytochrome c reductase complex 9.5 kDa protein) (Ubiquinol-cytochrome c reductase complex ubiquinone-binding protein QP-C) | 30300 | 32100 | 1.06 | -    | 56100 | 1.85 | Up   | 1.75 | Up |
| P09405     | NUCL       | Nucleolin (Protein C23)                                                                                                                                                                                                    | 15300 | 26500 | 1.73 | Up   | 23500 | 1.54 | Up   | 0.89 | -  |
| P47934     | CACP       | Carnitine O-acetyltransferase (Carnitine acetylase) (EC 2.3.1.7) (Carnitine acetyltransferase) (CAT) (CrAT)                                                                                                                | 25300 | 14800 | 0.58 | Down | 13700 | 0.54 | Down | 0.93 | -  |
| Q06185     | ATP5I      | ATP synthase subunit e, mitochondrial (ATPase subunit e) (ATP synthase membrane subunit e)                                                                                                                                 | 6990  | 17500 | 2.50 | Up   | 27800 | 3.98 | Up   | 1.59 | Up |
| Q924X2     | CPT1B      | Carnitine O-palmitoyltransferase 1, muscle isoform (CPT1-M) (EC 2.3.1.21) (Carnitine O-palmitoyltransferase I, muscle isoform) (CPT I) (CPTI-M) (Carnitine palmitoyltransferase 1B)                                        | 20000 | 10000 | 0.50 | Down | 18700 | 0.94 | -    | 1.87 | Up |
| Q99PT1     | GDIR1      | Rho GDP-dissociation inhibitor 1 (Rho GDI 1) (GDI-1)                                                                                                                                                                       | 4760  | 11000 | 2.31 | Up   | 12700 | 2.67 | Up   | 1.15 | -  |



|        |        |                                                                                                                                                                                                                                                               |       |       |      |      |       |       |      |      |    |
|--------|--------|---------------------------------------------------------------------------------------------------------------------------------------------------------------------------------------------------------------------------------------------------------------|-------|-------|------|------|-------|-------|------|------|----|
|        |        | (Rho-GDI alpha)                                                                                                                                                                                                                                               |       |       |      |      |       |       |      |      |    |
| P61027 | RAB10  | Ras-related protein Rab-10                                                                                                                                                                                                                                    | 2410  | 1850  | 0.77 | -    | 3250  | 1.35  | -    | 1.76 | Up |
| Q7TMG8 | Q7TMG8 | Glioblastoma amplified sequence (Protein NipSnap homolog 2)                                                                                                                                                                                                   | 11500 | 3920  | 0.34 | Down | 4100  | 0.36  | Down | 1.05 | -  |
| P47963 | RL13   | 60S ribosomal protein L13 (A52)                                                                                                                                                                                                                               | 2370  | 4230  | 1.78 | Up   | 5090  | 2.15  | Up   | 1.20 | -  |
| Q8CHT0 | AL4A1  | Delta-1-pyrroline-5-carboxylate dehydrogenase, mitochondrial (P5C dehydrogenase) (EC 1.2.1.88) (Aldehyde dehydrogenase family 4 member A1) (L-glutamate gamma-semialdehyde dehydrogenase)                                                                     | 5850  | 3830  | 0.65 | Down | 6350  | 1.09  | -    | 1.66 | Up |
| P62849 | RS24   | 40S ribosomal protein S24                                                                                                                                                                                                                                     | 10300 | 18200 | 1.77 | Up   | 34600 | 3.36  | Up   | 1.90 | Up |
| Q99MR8 | MCCA   | Methylcrotonoyl-CoA carboxylase subunit alpha, mitochondrial (MCCase subunit alpha) (EC 6.4.1.4) (3-methylcrotonyl-CoA carboxylase 1) (3-methylcrotonyl-CoA carboxylase biotin-containing subunit) (3-methylcrotonyl-CoA:carbon dioxide ligase subunit alpha) | 7680  | 4040  | 0.53 | Down | 6400  | 0.83  | -    | 1.58 | Up |
|        | RUXG   | Small nuclear ribonucleoprotein G (snRNP-G) (Sm protein G) (Sm-G) (SmG)                                                                                                                                                                                       | 1950  | 3140  | 1.61 | Up   | 3930  | 2.02  | Up   | 1.25 | -  |
| P62073 | TIM10  | Mitochondrial import inner membrane translocase subunit Tim10                                                                                                                                                                                                 | 4900  | 7160  | 1.46 | -    | 11100 | 2.27  | Up   | 1.55 | Up |
| P68433 | H31    | Histone H3.1                                                                                                                                                                                                                                                  | 8250  | 58000 | 7.03 | Up   | 86100 | 10.44 | Up   | 1.48 | -  |
| P08032 | SPTA1  | Spectrin alpha chain, erythrocytic 1 (Erythroid alpha-spectrin)                                                                                                                                                                                               | 755   | 526   | 0.70 | -    | 880   | 1.17  | -    | 1.67 | Up |
| P19001 | K1C19  | Keratin, type I cytoskeletal 19 (Cytokeratin-19) (CK-19) (Keratin-19) (K19)                                                                                                                                                                                   | 1500  | 2920  | 1.95 | Up   | 2640  | 1.76  | Up   | 0.90 | -  |
| Q923D2 | BLVRB  | Flavin reductase (NADPH) (FR) (EC 1.5.1.30) (Biliverdin reductase B) (BVR-B) (EC 1.3.1.24) (Biliverdin-IX beta-reductase) (NADPH-dependent diaphorase) (NADPH-flavin reductase) (FLR)                                                                         | 833   | 873   | 1.05 | -    | 1330  | 1.60  | Up   | 1.52 | Up |
| A0A1W2 | A0A1W2 | Ubiquitin-conjugating enzyme E2 N                                                                                                                                                                                                                             | 13100 | 8510  | 0.65 | Down | 8460  | 0.65  | Down | 0.99 | -  |

|                |                |                                                                                                                                                                                                                          |       |       |      |      |       |      |      |      |    |
|----------------|----------------|--------------------------------------------------------------------------------------------------------------------------------------------------------------------------------------------------------------------------|-------|-------|------|------|-------|------|------|------|----|
| P7Z3           | P7Z3           |                                                                                                                                                                                                                          |       |       |      |      |       |      |      |      |    |
| P62843         | RS15           | 40S ribosomal protein S15 (RIG protein)                                                                                                                                                                                  | 233   | 364   | 1.56 | Up   | 370   | 1.59 | Up   | 1.02 | -  |
| Q6ZWN5         | RS9            | 40S ribosomal protein S9                                                                                                                                                                                                 | 7050  | 11900 | 1.69 | Up   | 14300 | 2.03 | Up   | 1.20 | -  |
| D3Z1U9         | D3Z1U9         | NADH dehydrogenase [ubiquinone] flavoprotein 1, mitochondrial (EC 1.6.99.3) (EC 7.1.1.2)                                                                                                                                 | 8730  | 6140  | 0.70 | -    | 5500  | 0.63 | Down | 0.90 | -  |
| A0A1B0G<br>X27 | A0A1B0<br>GX27 | Branched-chain-amino-acid aminotransferase (EC 2.6.1.42)                                                                                                                                                                 | 3190  | 3920  | 1.23 | -    | 5100  | 1.60 | Up   | 1.30 | -  |
| Q9CR21         | ACPM           | Acyl carrier protein, mitochondrial (ACP) (CI-SDAP) (NADH-ubiquinone oxidoreductase 9.6 kDa subunit)                                                                                                                     | 6490  | 5260  | 0.81 | -    | 49800 | 7.67 | Up   | 9.47 | Up |
| Q91WS0         | CISD1          | CDGSH iron-sulfur domain-containing protein 1 (MitoNEET)                                                                                                                                                                 | 2300  | 5370  | 2.33 | Up   | 5770  | 2.51 | Up   | 1.07 | -  |
| A1BN54         | A1BN54         | Alpha actinin 1a (Alpha-actinin-1)                                                                                                                                                                                       | 1150  | 856   | 0.74 | -    | 730   | 0.63 | Down | 0.85 | -  |
| Q3TCD4         | Q3TCD4         | Enoyl-CoA delta isomerase 2, mitochondrial                                                                                                                                                                               | 1010  | 812   | 0.80 | -    | 666   | 0.66 | Down | 0.82 | -  |
| P42125         | ECI1           | Enoyl-CoA delta isomerase 1, mitochondrial (EC 5.3.3.8) (3,2-trans-enoyl-CoA isomerase) (Delta(3),Delta(2)-enoyl-CoA isomerase) (D3,D2-enoyl-CoA isomerase) (Dodecenoyl-CoA isomerase)                                   | 23700 | 12800 | 0.54 | Down | 10800 | 0.46 | Down | 0.84 | -  |
| Q9CPQ1         | COX6C          | Cytochrome c oxidase subunit 6C (Cytochrome c oxidase polypeptide VIc)                                                                                                                                                   | 8820  | 9670  | 1.10 | -    | 13900 | 1.58 | Up   | 1.44 | -  |
| E9PZF0         | E9PZF0         | Nucleoside diphosphate kinase (EC 2.7.4.6)                                                                                                                                                                               | 14300 | 7650  | 0.53 | Down | 7470  | 0.52 | Down | 0.98 | -  |
| Q99J99         | THTM           | 3-mercaptopyruvate sulfurtransferase (MST) (EC 2.8.1.2)                                                                                                                                                                  | 9110  | 4510  | 0.50 | Down | 7040  | 0.77 | -    | 1.56 | Up |
| P05125         | ANF            | Natriuretic peptides A (Prepronatriodilatin) [Cleaved into: Atrial natriuretic factor (ANF) (Atrial natriuretic peptide) (ANP); Auriculin-B; Auriculin-A; Atriopeptin-1 (Atriopeptin I); Atriopeptin-2 (Atriopeptin II)] | 4090  | 10100 | 2.47 | Up   | 8530  | 2.09 | Up   | 0.84 | -  |
| B1ARA5         | B1ARA5         | 60S ribosomal protein L26                                                                                                                                                                                                | 4400  | 6460  | 1.47 | -    | 13300 | 3.02 | Up   | 2.06 | Up |
| P56375         | ACYP2          | Acylphosphatase-2 (EC 3.6.1.7) (Acylphosphatase, muscle type isozyme) (Acylphosphate phosphohydrolase 2)                                                                                                                 | 10600 | 26000 | 2.45 | Up   | 25500 | 2.41 | Up   | 0.98 | -  |

|        |       |                                                                                                                                                                                                                                      |       |       |      |      |        |      |      |      |      |
|--------|-------|--------------------------------------------------------------------------------------------------------------------------------------------------------------------------------------------------------------------------------------|-------|-------|------|------|--------|------|------|------|------|
| P15626 | GSTM2 | Glutathione S-transferase Mu 2 (EC 2.5.1.18) (GST 5-5) (GST class-mu 2) (Glutathione S-transferase pmGT2)                                                                                                                            | 8990  | 13400 | 1.49 | Up   | 15500  | 1.72 | Up   | 1.16 | -    |
| Q9DC70 | NDUS7 | NADH dehydrogenase [ubiquinone] iron-sulfur protein 7, mitochondrial (EC 1.6.99.3) (EC 7.1.1.2) (Complex I-20kD) (CI-20kD) (NADH-ubiquinone oxidoreductase 20 kDa subunit)                                                           | 93500 | 43900 | 0.47 | Down | 50600  | 0.54 | Down | 1.15 | -    |
| Q99PR8 | HSPB2 | Heat shock protein beta-2 (HspB2)                                                                                                                                                                                                    | 4110  | 5220  | 1.27 | -    | 6240   | 1.52 | Up   | 1.20 | -    |
| P56392 | CX7A1 | Cytochrome c oxidase subunit 7A1, mitochondrial (Cytochrome c oxidase subunit VIIa-heart)                                                                                                                                            | 54300 | 72300 | 1.33 | -    | 109000 | 2.01 | Up   | 1.51 | Up   |
| P06151 | LDHA  | (Cytochrome c oxidase subunit VIIa-muscle) (Cytochrome c oxidase subunit VIIa-M)                                                                                                                                                     | 15500 | 8910  | 0.57 | Down | 10100  | 0.65 | Down | 1.13 | -    |
| Q99LC3 | NDUAA | L-lactate dehydrogenase A chain (LDH-A) (EC 1.1.1.27) (LDH muscle subunit) (LDH-M)                                                                                                                                                   | 8620  | 11600 | 1.35 | -    | 7740   | 0.90 | -    | 0.67 | Down |
| P11983 | TCPA  | NADH dehydrogenase [ubiquinone] 1 alpha subcomplex subunit 10, mitochondrial (Complex I-42kD) (CI-42kD) (NADH-ubiquinone oxidoreductase 42 kDa subunit)                                                                              | 10000 | 10800 | 1.08 | -    | 17900  | 1.79 | Up   | 1.66 | Up   |
| P01902 | HA1D  | T-complex protein 1 subunit alpha (TCP-1-alpha)                                                                                                                                                                                      | 7290  | 7080  | 0.97 | -    | 15800  | 2.17 | Up   | 2.23 | Up   |
| P10493 | NID1  | (CCT-alpha) (Tailless complex polypeptide 1A) (TCP-1-A) (Tailless complex polypeptide 1B) (TCP-1-B)                                                                                                                                  | 4480  | 4880  | 1.09 | -    | 8160   | 1.82 | Up   | 1.67 | Up   |
| P53395 | ODB2  | H-2 class I histocompatibility antigen, K-D alpha chain (H-2K(D))                                                                                                                                                                    | 39300 | 26800 | 0.68 | -    | 22800  | 0.58 | Down | 0.85 | -    |
|        |       | Nidogen-1 (NID-1) (Entactin)                                                                                                                                                                                                         |       |       |      |      |        |      |      |      |      |
|        |       | Lipoamide acyltransferase component of branched-chain alpha-keto acid dehydrogenase complex, mitochondrial (EC 2.3.1.168) (Branched-chain alpha-keto acid dehydrogenase complex component E2) (BCKAD-E2) (BCKADE2) (Dihydrolipoamide |       |       |      |      |        |      |      |      |      |

|        |        |                                                                                                                                                                                                                                       |       |       |      |      |       |      |      |      |      |
|--------|--------|---------------------------------------------------------------------------------------------------------------------------------------------------------------------------------------------------------------------------------------|-------|-------|------|------|-------|------|------|------|------|
|        |        | acetyltransferase component of branched-chain alpha-keto acid dehydrogenase complex) (Dihydrolipoamide branched chain transacylase) (Dihydrolipoyllysine-residue (2-methylpropanoyl)transferase)                                      |       |       |      |      |       |      |      |      |      |
| Q99JB2 | STML2  | Stomatin-like protein 2, mitochondrial (SLP-2) (mslp2)                                                                                                                                                                                | 1780  | 3100  | 1.74 | Up   | 2920  | 1.64 | Up   | 0.94 | -    |
| P61982 | 1433G  | 14-3-3 protein gamma [Cleaved into: 14-3-3 protein gamma, N-terminally processed]                                                                                                                                                     | 3900  | 2020  | 0.52 | Down | 1940  | 0.50 | Down | 0.96 | -    |
| Q9Z2D6 | MECP2  | Methyl-CpG-binding protein 2 (MeCp-2 protein) (MeCp2)                                                                                                                                                                                 | 2770  | 5470  | 1.97 | Up   | 5320  | 1.92 | Up   | 0.97 | -    |
| P29595 | NEDD8  | NEDD8 (Neddylin) (Neural precursor cell expressed developmentally down-regulated protein 8) (NEDD-8) (Ubiquitin-like protein Nedd8)                                                                                                   | 31400 | 52500 | 1.67 | Up   | 52200 | 1.66 | Up   | 0.99 | -    |
| F8VPN4 | F8VPN4 | Amylo-1,6-glucosidase, 4-alpha-glucanotransferase                                                                                                                                                                                     | 1700  | 1090  | 0.64 | Down | 1040  | 0.61 | Down | 0.95 | -    |
| Q8CBM2 | Q8CBM2 | Aspartyl/asparaginyl beta-hydroxylase                                                                                                                                                                                                 | 11100 | 14700 | 1.32 | -    | 30800 | 2.77 | Up   | 2.10 | Up   |
| Q9CYT6 | CAP2   | Adenylyl cyclase-associated protein 2 (CAP 2)                                                                                                                                                                                         | 9480  | 11300 | 1.19 | -    | 5140  | 0.54 | Down | 0.45 | Down |
| Q8C845 | Q8C845 | EF-hand domain-containing protein D2 (Efhd2 protein)                                                                                                                                                                                  | 6170  | 16200 | 2.63 | Up   | 12400 | 2.01 | Up   | 0.77 | -    |
| Q9D1D4 | TMEDA  | Transmembrane emp24 domain-containing protein 10 (21 kDa transmembrane-trafficking protein) (Transmembrane protein Tmp21) (p24 family protein delta-1) (p24delta1)                                                                    | 10600 | 12900 | 1.22 | -    | 22500 | 2.12 | Up   | 1.74 | Up   |
| P40630 | TFAM   | Transcription factor A, mitochondrial (mtTFA) (Testis-specific high mobility group protein) (TS-HMG)                                                                                                                                  | 9470  | 16400 | 1.73 | Up   | 15700 | 1.66 | Up   | 0.96 | -    |
| Q9R229 | BMP10  | Bone morphogenetic protein 10 (BMP-10)                                                                                                                                                                                                | 2940  | 13700 | 4.66 | Up   | 9030  | 3.07 | Up   | 0.66 | Down |
| Q68FD5 | CLH1   | Clathrin heavy chain 1                                                                                                                                                                                                                | 5680  | 7630  | 1.34 | -    | 4470  | 0.79 | -    | 0.59 | Down |
| E9Q9C4 | E9Q9C4 | Actin-binding LIM protein 1                                                                                                                                                                                                           | 3020  | 5730  | 1.90 | Up   | 5210  | 1.73 | Up   | 0.91 | -    |
| Q99KV1 | DJB11  | DnaJ homolog subfamily B member 11 (APOBEC1-binding protein 2) (ABBP-2) (ER-associated DNAJ) (ER-associated Hsp40 co-chaperone) (Endoplasmic reticulum DNA J domain-containing protein 3) (ER-resident protein ERdj3) (ERdj3) (ERj3p) | 6320  | 10700 | 1.69 | Up   | 12900 | 2.04 | Up   | 1.21 | -    |

|                |                |                                                                                                                                                                                      |       |       |      |      |       |      |      |      |    |
|----------------|----------------|--------------------------------------------------------------------------------------------------------------------------------------------------------------------------------------|-------|-------|------|------|-------|------|------|------|----|
| Q8BUY5         | TIDC1          | Complex I assembly factor TIMMDC1, mitochondrial (Translocase of inner mitochondrial membrane domain-containing protein 1) (TIMM domain containing-protein 1)                        | 6380  | 5310  | 0.83 | -    | 11400 | 1.79 | Up   | 2.15 | Up |
| Q9QZM0         | UBQL2          | Ubiquilin-2 (Chap1) (DSK2 homolog) (Protein linking IAP with cytoskeleton 2) (PLIC-2) (Ubiquitin-like product Chap1/Dsk2)                                                            | 2990  | 2000  | 0.67 | Down | 1970  | 0.66 | Down | 0.99 | -  |
| P17665         | COX7C          | Cytochrome c oxidase subunit 7C, mitochondrial (Cytochrome c oxidase polypeptide VIIc)                                                                                               | 486   | 658   | 1.36 | -    | 782   | 1.61 | Up   | 1.19 | -  |
| A0A087<br>WSN6 | A0A087<br>WSN6 | Fibronectin (Fibronectin 1, isoform CRA_c)                                                                                                                                           | 2480  | 3310  | 1.33 | -    | 4150  | 1.67 | Up   | 1.25 | -  |
| Q99NB1         | ACS2L          | Acetyl-coenzyme A synthetase 2-like, mitochondrial (EC 6.2.1.1) (Acetate--CoA ligase 2) (Acetyl-CoA synthetase 2) (AceCS2) (Acyl-CoA synthetase short-chain family member 1)         | 8510  | 6400  | 0.75 | -    | 4830  | 0.57 | Down | 0.75 | -  |
| Q9DCV7         | K2C7           | Keratin, type II cytoskeletal 7 (Cytokeratin-7) (CK-7) (Keratin-7) (K7) (Type-II keratin Kb7)                                                                                        | 1140  | 2640  | 2.32 | Up   | 1880  | 1.65 | Up   | 0.71 | -  |
| Q61646         | HPT            | Haptoglobin [Cleaved into: Haptoglobin alpha chain; Haptoglobin beta chain]                                                                                                          | 3590  | 13800 | 3.84 | Up   | 13400 | 3.73 | Up   | 0.97 | -  |
| P08551         | NFL            | Neurofilament light polypeptide (NF-L) (68 kDa neurofilament protein) (Neurofilament triplet L protein)                                                                              | 2010  | 1730  | 0.86 | -    | 2600  | 1.29 | -    | 1.50 | Up |
| G5E850         | G5E850         | Cytochrome b-5, isoform CRA_a (Cytochrome b5)                                                                                                                                        | 5310  | 9500  | 1.79 | Up   | 10800 | 2.03 | Up   | 1.14 | -  |
| Q61704         | ITIH3          | Inter-alpha-trypsin inhibitor heavy chain H3 (ITI heavy chain H3) (ITI-HC3) (Inter-alpha-inhibitor heavy chain 3)                                                                    | 2460  | 2870  | 1.17 | -    | 3990  | 1.62 | Up   | 1.39 | -  |
| Q8BWM0         | PGES2          | Prostaglandin E synthase 2 (EC 5.3.99.3) (GATE-binding factor 1) (GBF-1) (Microsomal prostaglandin E synthase 2) (mPGES-2) [Cleaved into: Prostaglandin E synthase 2 truncated form] | 24300 | 15700 | 0.65 | Down | 11600 | 0.48 | Down | 0.74 | -  |
| Q9CQA3         | SDHB           | Succinate dehydrogenase [ubiquinone] iron-sulfur                                                                                                                                     | 4290  | 2590  | 0.60 | Down | 2620  | 0.61 | Down | 1.01 | -  |

|        |        |                                                                                                                                                                                                                                          |       |       |      |      |       |      |      |      |    |
|--------|--------|------------------------------------------------------------------------------------------------------------------------------------------------------------------------------------------------------------------------------------------|-------|-------|------|------|-------|------|------|------|----|
|        |        | subunit, mitochondrial (EC 1.3.5.1) (Iron-sulfur subunit of complex II) (Ip)                                                                                                                                                             |       |       |      |      |       |      |      |      |    |
| P29788 | VTNC   | Vitronectin (VN) (S-protein) (Serum-spreading factor)                                                                                                                                                                                    | 2310  | 2770  | 1.20 | -    | 4480  | 1.94 | Up   | 1.62 | Up |
| P63276 | RS17   | 40S ribosomal protein S17                                                                                                                                                                                                                | 2420  | 3880  | 1.60 | Up   | 3930  | 1.62 | Up   | 1.01 | -  |
| P10518 | HEM2   | Delta-aminolevulinic acid dehydratase (ALADH) (EC 4.2.1.24) (Porphobilinogen synthase)                                                                                                                                                   | 13900 | 9360  | 0.67 | -    | 8930  | 0.64 | Down | 0.95 | -  |
| Q9QZQ8 | H2AY   | Core histone macro-H2A.1 (Histone macroH2A1) (mH2A1) (H2A.y) (H2A/y)                                                                                                                                                                     | 4710  | 6520  | 1.38 | -    | 7790  | 1.65 | Up   | 1.19 | -  |
| Q9D023 | MPC2   | Mitochondrial pyruvate carrier 2 (Brain protein 44)                                                                                                                                                                                      | 994   | 1430  | 1.44 | -    | 3510  | 3.53 | Up   | 2.45 | Up |
| Q9CQX2 | CYB5B  | Cytochrome b5 type B (Cytochrome b5 outer mitochondrial membrane isoform)                                                                                                                                                                | 1400  | 2750  | 1.96 | Up   | 4100  | 2.93 | Up   | 1.49 | Up |
| P54797 | TNG2   | Transport and Golgi organization 2 homolog (Ser/Thr-rich protein T10 in DGCR region)                                                                                                                                                     | 2950  | 2110  | 0.72 | -    | 1830  | 0.62 | Down | 0.87 | -  |
| Q99LY9 | NDUS5  | NADH dehydrogenase [ubiquinone] iron-sulfur protein 5 (Complex I-15 kDa) (CI-15 kDa) (NADH-ubiquinone oxidoreductase 15 kDa subunit)                                                                                                     | 39200 | 10500 | 0.27 | Down | 13000 | 0.33 | Down | 1.24 | -  |
| Q9Z1P6 | NDUA7  | NADH dehydrogenase [ubiquinone] 1 alpha subcomplex subunit 7 (Complex I-B14.5a) (CI-B14.5a) (NADH-ubiquinone oxidoreductase subunit B14.5a)                                                                                              | 2450  | 5050  | 2.06 | Up   | 5080  | 2.07 | Up   | 1.01 | -  |
| P67984 | RL22   | 60S ribosomal protein L22 (Heparin-binding protein HBp15)                                                                                                                                                                                | 762   | 963   | 1.26 | -    | 1540  | 2.02 | Up   | 1.60 | Up |
| Q8BMF3 | MAON   | NADP-dependent malic enzyme, mitochondrial (NADP-ME) (EC 1.1.1.40) (Malic enzyme 3)                                                                                                                                                      | 4250  | 2930  | 0.69 | -    | 2560  | 0.60 | Down | 0.87 | -  |
| A2ACG7 | A2ACG7 | Dolichyl-diphosphooligosaccharide--protein glycosyltransferase subunit 2                                                                                                                                                                 | 5070  | 5810  | 1.15 | -    | 7720  | 1.52 | Up   | 1.33 | -  |
| P62960 | YBOX1  | Nuclease-sensitive element-binding protein 1 (CCAAT-binding transcription factor I subunit A) (CBF-A) (DNA-binding protein B) (DBPB) (Enhancer factor I subunit A) (EFI-A) (Y-box transcription factor) (Y-box-binding protein 1) (YB-1) | 449   | 849   | 1.89 | Up   | 740   | 1.65 | Up   | 0.87 | -  |

|                |                |                                                                                                                                                                                     |       |       |      |      |       |      |      |      |      |
|----------------|----------------|-------------------------------------------------------------------------------------------------------------------------------------------------------------------------------------|-------|-------|------|------|-------|------|------|------|------|
| P32261         | ANT3           | Antithrombin-III (ATIII) (Serpin C1)                                                                                                                                                | 3890  | 3330  | 0.86 | -    | 5930  | 1.52 | Up   | 1.78 | Up   |
| A2AUD5         | A2AUD5         | Tumor protein D54                                                                                                                                                                   | 12200 | 20400 | 1.67 | Up   | 19300 | 1.58 | Up   | 0.95 | -    |
| A0A1B0G<br>R19 | A0A1B0<br>GR19 | Reticulocalbin-3 (Fragment)                                                                                                                                                         | 5180  | 8680  | 1.68 | Up   | 9800  | 1.89 | Up   | 1.13 | -    |
| Q9DCM2         | GSTK1          | Glutathione S-transferase kappa 1 (EC 2.5.1.18) (GST 13-13) (GST class-kappa) (GSTK1-1) (mGSTK1) (Glutathione S-transferase subunit 13)                                             | 13100 | 6980  | 0.53 | Down | 5700  | 0.44 | Down | 0.82 | -    |
| Q5M8N4         | D39U1          | Epimerase family protein SDR39U1 (EC 1.1.1.-) (Short-chain dehydrogenase/reductase family 39U member 1)                                                                             | 11200 | 6140  | 0.55 | Down | 6430  | 0.57 | Down | 1.05 | -    |
| Q62048         | PEA15          | Astrocytic phosphoprotein PEA-15 (15 kDa phosphoprotein enriched in astrocytes)                                                                                                     | 4220  | 3380  | 0.80 | -    | 2450  | 0.58 | Down | 0.72 | -    |
| P35564         | CALX           | Calnexin                                                                                                                                                                            | 12600 | 9060  | 0.72 | -    | 6890  | 0.55 | Down | 0.76 | -    |
| Q61029         | LAP2B          | Lamina-associated polypeptide 2, isoforms beta/delta/epsilon/gamma (Thymopoietin isoforms beta/delta/epsilon/gamma) (TP beta/delta/epsilon/gamma)                                   | 10800 | 19000 | 1.76 | Up   | 16900 | 1.56 | Up   | 0.89 | -    |
| P49817         | CAV1           | Caveolin-1                                                                                                                                                                          | 1770  | 1630  | 0.92 | -    | 3660  | 2.07 | Up   | 2.25 | Up   |
| Q8RII1         | QCR9           | Cytochrome b-c1 complex subunit 9 (Complex III subunit 9) (Complex III subunit X) (Cytochrome c1 non-heme 7 kDa protein) (Ubiquinol-cytochrome c reductase complex 7.2 kDa protein) | 17200 | 16500 | 0.96 | -    | 34300 | 1.99 | Up   | 2.08 | Up   |
| Q91V64         | ISOC1          | Isochorismatase domain-containing protein 1                                                                                                                                         | 542   | 831   | 1.53 | Up   | 942   | 1.74 | Up   | 1.13 | -    |
| D3YUG3         | D3YUG3         | 40S ribosomal protein S19 (Fragment)                                                                                                                                                | 6700  | 5160  | 0.77 | -    | 4360  | 0.65 | Down | 0.84 | -    |
| B1AXW6         | B1AXW6         | Peroxiredoxin-1 (Fragment)                                                                                                                                                          | 10700 | 22200 | 2.07 | Up   | 20300 | 1.90 | Up   | 0.91 | -    |
| P63325         | RS10           | 40S ribosomal protein S10                                                                                                                                                           | 4070  | 5030  | 1.24 | -    | 6290  | 1.55 | Up   | 1.25 | -    |
| O08600         | NUCG           | Endonuclease G, mitochondrial (Endo G) (EC 3.1.30.-)                                                                                                                                | 2020  | 1910  | 0.95 | -    | 3050  | 1.51 | Up   | 1.60 | Up   |
| Q61768         | KINH           | Kinesin-1 heavy chain (Conventional kinesin heavy chain) (Ubiquitous kinesin heavy chain) (UKHC)                                                                                    | 6920  | 9880  | 1.43 | -    | 5270  | 0.76 | -    | 0.53 | Down |
| Q91ZU6         | DYST           | Dystonin (Bullous pemphigoid antigen 1) (BPA)                                                                                                                                       | 220   | 397   | 1.81 | Up   | 348   | 1.58 | Up   | 0.88 | -    |

|        |        |                                                                                                                                                                                                                    |       |       |      |      |       |      |      |      |    |
|--------|--------|--------------------------------------------------------------------------------------------------------------------------------------------------------------------------------------------------------------------|-------|-------|------|------|-------|------|------|------|----|
|        |        | (Dystonia musculorum protein) (Hemidesmosomal plaque protein) (Microtubule actin cross-linking factor 2)                                                                                                           |       |       |      |      |       |      |      |      |    |
| A2AJI1 | A2AJI1 | MAP7 domain-containing protein 1                                                                                                                                                                                   | 3920  | 6870  | 1.75 | Up   | 6430  | 1.64 | Up   | 0.94 | -  |
| Q9JK92 | HSPB8  | Heat shock protein beta-8 (HspB8) (Alpha-crystallin C chain) (Small stress protein-like protein HSP22)                                                                                                             | 1160  | 1180  | 1.02 | -    | 2860  | 2.47 | Up   | 2.42 | Up |
| Q99MQ4 | ASPN   | Asporin (Periodontal ligament-associated protein 1) (PLAP-1)                                                                                                                                                       | 16600 | 13200 | 0.80 | -    | 10200 | 0.61 | Down | 0.77 | -  |
| Q9D898 | ARPSL  | Actin-related protein 2/3 complex subunit 5-like protein (Arp2/3 complex 16 kDa subunit 2) (ARC16-2)                                                                                                               | 606   | 485   | 0.80 | -    | 388   | 0.64 | Down | 0.80 | -  |
| Q62167 | DDX3X  | ATP-dependent RNA helicase DDX3X (EC 3.6.4.13) (D1Pas1-related sequence 2) (DEAD box RNA helicase DEAD3) (mDEAD3) (DEAD box protein 3, X-chromosomal) (Embryonic RNA helicase)                                     | 2840  | 1090  | 0.38 | Down | 1090  | 0.38 | Down | 1.00 | -  |
| Q9QZ85 | IIGP1  | Interferon-inducible GTPase 1 (EC 3.6.5.-)                                                                                                                                                                         | 3150  | 2550  | 0.81 | -    | 4770  | 1.51 | Up   | 1.87 | Up |
| Q8C0E2 | VP26B  | Vacuolar protein sorting-associated protein 26B (Vesicle protein sorting 26B)                                                                                                                                      | 3780  | 4850  | 1.28 | -    | 7300  | 1.93 | Up   | 1.51 | Up |
| O09167 | RL21   | 60S ribosomal protein L21                                                                                                                                                                                          | 2780  | 4260  | 1.53 | Up   | 4890  | 1.76 | Up   | 1.15 | -  |
| P43276 | H15    | Histone H1.5 (H1 VAR.5) (H1b)                                                                                                                                                                                      | 154   | 406   | 2.64 | Up   | 484   | 3.15 | Up   | 1.19 | -  |
| P12246 | SAMP   | Serum amyloid P-component (SAP)                                                                                                                                                                                    | 5900  | 7680  | 1.30 | -    | 9420  | 1.60 | Up   | 1.23 | -  |
| Q9CR57 | RL14   | 60S ribosomal protein L14                                                                                                                                                                                          | 6620  | 12800 | 1.93 | Up   | 19900 | 3.01 | Up   | 1.55 | Up |
| Q9JLZ3 | AUHM   | Methylglutaconyl-CoA hydratase, mitochondrial (EC 4.2.1.18) (AU-specific RNA-binding enoyl-CoA hydratase) (AU-binding enoyl-CoA hydratase) (muAUH) (Itaconyl-CoA hydratase) (EC 4.2.1.56)                          | 18300 | 12000 | 0.66 | Down | 10500 | 0.57 | Down | 0.88 | -  |
| P26883 | FKB1A  | Peptidyl-prolyl cis-trans isomerase FKBP1A (PPIase FKBP1A) (EC 5.2.1.8) (12 kDa FK506-binding protein) (12 kDa FKBP) (FKBP-12) (Calstabin-1) (FK506-binding protein 1A) (FKBP-1A) (Immunophilin FKBP12) (Rotamase) | 2570  | 2960  | 1.15 | -    | 6650  | 2.59 | Up   | 2.25 | Up |



|            |            |                                                                                                                                              |       |       |      |      |       |      |      |      |      |
|------------|------------|----------------------------------------------------------------------------------------------------------------------------------------------|-------|-------|------|------|-------|------|------|------|------|
| P61358     | RL27       | 60S ribosomal protein L27                                                                                                                    | 2670  | 3360  | 1.26 | -    | 5610  | 2.10 | Up   | 1.67 | Up   |
| P01837     | IGKC       | Immunoglobulin kappa constant (Ig kappa chain C region MOPC 21)                                                                              | 1020  | 1370  | 1.34 | -    | 1870  | 1.83 | Up   | 1.36 | -    |
| A0A0R4J0J0 | A0A0R4J0J0 | Palmdelphin                                                                                                                                  | 11000 | 9810  | 0.89 | -    | 5020  | 0.46 | Down | 0.51 | Down |
| Q6IFX2     | K1C42      | Keratin, type I cytoskeletal 42 (Cytokeratin-42) (CK-42) (Keratin-17n) (Keratin-42) (K42) (Type I keratin Ka22)                              | 407   | 570   | 1.40 | -    | 757   | 1.86 | Up   | 1.33 | -    |
| P05784     | K1C18      | Keratin, type I cytoskeletal 18 (Cytokeratin endo B) (Keratin D) (Cytokeratin-18) (CK-18) (Keratin-18) (K18)                                 | 770   | 1670  | 2.17 | Up   | 1640  | 2.13 | Up   | 0.98 | -    |
| Q80YX1     | TENA       | Tenascin (TN) (Hexabrachion) (Tenascin-C) (TN-C)                                                                                             | 503   | 634   | 1.26 | -    | 760   | 1.51 | Up   | 1.20 | -    |
| Q60676     | PPP5       | Serine/threonine-protein phosphatase 5 (PP5) (EC 3.1.3.16) (Protein phosphatase T) (PPT)                                                     | 757   | 1290  | 1.70 | Up   | 1170  | 1.55 | Up   | 0.91 | -    |
| Q61160     | FADD       | FAS-associated death domain protein (FAS-associating death domain-containing protein) (Mediator of receptor induced toxicity) (Protein FADD) | 4050  | 2650  | 0.65 | Down | 2240  | 0.55 | Down | 0.85 | -    |
| Q921J2     | RHEB       | GTP-binding protein Rheb (Ras homolog enriched in brain)                                                                                     | 3620  | 2770  | 0.77 | -    | 4500  | 1.24 | -    | 1.62 | Up   |
| A0A140T8T4 | A0A140T8T4 | Ribosomal protein L9, pseudogene 6                                                                                                           | 8890  | 11600 | 1.30 | -    | 14100 | 1.59 | Up   | 1.22 | -    |
| O09164     | SODE       | Extracellular superoxide dismutase [Cu-Zn] (EC-SOD) (EC 1.15.1.1)                                                                            | 1950  | 2090  | 1.07 | -    | 3140  | 1.61 | Up   | 1.50 | Up   |
| P82347     | SGCD       | Delta-sarcoglycan (Delta-SG) (35 kDa dystrophin-associated glycoprotein) (35DAG)                                                             | 2430  | 4560  | 1.88 | Up   | 4850  | 2.00 | Up   | 1.06 | -    |
| P10833     | RRAS       | Ras-related protein R-Ras (p23)                                                                                                              | 2590  | 4840  | 1.87 | Up   | 5610  | 2.17 | Up   | 1.16 | -    |
| Q8BWY3     | ERF1       | Eukaryotic peptide chain release factor subunit 1 (Eukaryotic release factor 1) (eRF1)                                                       | 392   | 350   | 0.89 | -    | 252   | 0.64 | Down | 0.72 | -    |
| Q9CPT4     | MYDGF      | Myeloid-derived growth factor (MYDGF)                                                                                                        | 1940  | 3280  | 1.69 | Up   | 4770  | 2.46 | Up   | 1.45 | -    |
| Q8BGJ5     | Q8BGJ5     | MCG13402, isoform CRA_a (Polypyrimidine tract-                                                                                               | 692   | 789   | 1.14 | -    | 1090  | 1.57 | Up   | 1.38 | -    |

|        |        |                                                                                                                                                                                                  |      |      |      |      |       |       |      |       |    |
|--------|--------|--------------------------------------------------------------------------------------------------------------------------------------------------------------------------------------------------|------|------|------|------|-------|-------|------|-------|----|
|        |        | binding protein 1)                                                                                                                                                                               |      |      |      |      |       |       |      |       |    |
|        |        | NADH dehydrogenase [ubiquinone] 1 alpha                                                                                                                                                          |      |      |      |      |       |       |      |       |    |
| Q9CQ91 | NDUA3  | subcomplex subunit 3 (Complex I-B9) (CI-B9)<br>(NADH-ubiquinone oxidoreductase B9 subunit)                                                                                                       | 376  | 355  | 0.95 | -    | 4810  | 12.79 | Up   | 13.53 | Up |
| P35980 | RL18   | 60S ribosomal protein L18                                                                                                                                                                        | 4270 | 6610 | 1.55 | Up   | 9440  | 2.21  | Up   | 1.43  | -  |
| Q80WJ7 | LYRIC  | Protein LYRIC (3D3/LYRIC) (Lysine-rich CEACAM1<br>co-isolated protein) (Metadherin) (Metastasis adhesion<br>protein)                                                                             | 1110 | 1420 | 1.28 | -    | 1700  | 1.53  | Up   | 1.20  | -  |
| Q3URE1 | ACSF3  | Acyl-CoA synthetase family member 3, mitochondrial<br>(EC 6.2.1.-)                                                                                                                               | 1560 | 1120 | 0.72 | -    | 1010  | 0.65  | Down | 0.90  | -  |
| P63005 | LIS1   | Platelet-activating factor acetylhydrolase IB subunit<br>alpha (Lissencephaly-1 protein) (LIS-1) (PAF<br>acetylhydrolase 45 kDa subunit) (PAF-AH 45 kDa<br>subunit) (PAF-AH alpha) (PAFAH alpha) | 3640 | 3180 | 0.87 | -    | 4820  | 1.32  | -    | 1.52  | Up |
| Q62186 | SSRD   | Translocon-associated protein subunit delta (TRAP-<br>delta) (Signal sequence receptor subunit delta) (SSR-<br>delta)                                                                            | 6820 | 9990 | 1.46 | -    | 13300 | 1.95  | Up   | 1.33  | -  |
| Q8C253 | Q8C253 | Galectin                                                                                                                                                                                         | 9510 | 4970 | 0.52 | Down | 6060  | 0.64  | Down | 1.22  | -  |
| Q60590 | A1AG1  | Alpha-1-acid glycoprotein 1 (AGP 1) (Orosomucoid-1)<br>(OMD 1)                                                                                                                                   | 1380 | 2050 | 1.49 | -    | 2530  | 1.83  | Up   | 1.23  | -  |
| P35979 | RL12   | 60S ribosomal protein L12                                                                                                                                                                        | 4990 | 5770 | 1.16 | -    | 7790  | 1.56  | Up   | 1.35  | -  |
| Q02013 | AQP1   | Aquaporin-1 (AQP-1) (Aquaporin-CHIP) (Delayed<br>early response protein 2) (DER2) (Water channel<br>protein for red blood cells and kidney proximal tubule)                                      | 141  | 170  | 1.21 | -    | 230   | 1.63  | Up   | 1.35  | -  |
| D3Z569 | D3Z569 | Signal peptidase complex catalytic subunit SEC11 (EC<br>3.4.21.89)                                                                                                                               | 5460 | 6600 | 1.21 | -    | 11100 | 2.03  | Up   | 1.68  | Up |
| P62309 | RUXG   | Small nuclear ribonucleoprotein G (snRNP-G) (Sm<br>protein G) (Sm-G) (SmG)                                                                                                                       | 1950 | 3140 | 1.61 | Up   | 3930  | 2.02  | Up   | 1.25  | -  |
| Q99K94 | Q99K94 | Signal transducer and activator of transcription                                                                                                                                                 | 503  | 431  | 0.86 | -    | 696   | 1.38  | -    | 1.61  | Up |
| Q00519 | XDH    | Xanthine dehydrogenase/oxidase [Includes: Xanthine                                                                                                                                               | 2770 | 1370 | 0.49 | Down | 1720  | 0.62  | Down | 1.26  | -  |

|            |            |                                                                                                                                                                                                                                                                                       |       |       |      |      |       |      |      |      |      |
|------------|------------|---------------------------------------------------------------------------------------------------------------------------------------------------------------------------------------------------------------------------------------------------------------------------------------|-------|-------|------|------|-------|------|------|------|------|
|            |            | dehydrogenase (XD) (EC 1.17.1.4); Xanthine oxidase (XO) (EC 1.17.3.2) (Xanthine oxidoreductase) (XOR)]                                                                                                                                                                                |       |       |      |      |       |      |      |      |      |
| A0A0B4J1E2 | A0A0B4J1E2 | SNW domain-containing protein 1                                                                                                                                                                                                                                                       | 960   | 1300  | 1.35 | -    | 1450  | 1.51 | Up   | 1.12 | -    |
| D3YV99     | D3YV99     | COP9 signalosome complex subunit 4 (Fragment)                                                                                                                                                                                                                                         | 3660  | 2490  | 0.68 | -    | 1910  | 0.52 | Down | 0.77 | -    |
| P26516     | PSMD7      | 26S proteasome non-ATPase regulatory subunit 7 (26S proteasome regulatory subunit RPN8) (26S proteasome regulatory subunit S12) (Mov34 protein) (Proteasome subunit p40)                                                                                                              | 4900  | 7340  | 1.50 | Up   | 8050  | 1.64 | Up   | 1.10 | -    |
| O09174     | AMACR      | Alpha-methylacyl-CoA racemase (EC 5.1.99.4) (2-methylacyl-CoA racemase)                                                                                                                                                                                                               | 818   | 913   | 1.12 | -    | 570   | 0.70 | -    | 0.62 | Down |
| Q9D020     | 5NT3A      | Cytosolic 5'-nucleotidase 3A (EC 3.1.3.5) (7-methylguanosine phosphate-specific 5'-nucleotidase) (7-methylguanosine nucleotidase) (EC 3.1.3.91) (Cytosolic 5'-nucleotidase 3) (Cytosolic 5'-nucleotidase III) (cN-III) (Lupin) (Pyrimidine 5'-nucleotidase 1) (P5'N-1) (P5N-1) (PN-I) | 4660  | 3380  | 0.73 | -    | 2760  | 0.59 | Down | 0.82 | -    |
| P43275     | H11        | Histone H1.1 (H1 VAR.3) (Histone H1a) (H1a)                                                                                                                                                                                                                                           | 956   | 1410  | 1.47 | -    | 1500  | 1.57 | Up   | 1.06 | -    |
| Q05816     | FABP5      | Fatty acid-binding protein 5 (Epidermal-type fatty acid-binding protein) (E-FABP) (Fatty acid-binding protein, epidermal) (Keratinocyte lipid-binding protein) (Psoriasis-associated fatty acid-binding protein homolog) (PA-FABP)                                                    | 17800 | 11900 | 0.67 | Down | 11200 | 0.63 | Down | 0.94 | -    |
| P15089     | CBPA3      | Mast cell carboxypeptidase A (MC-CPA) (EC 3.4.17.1) (Carboxypeptidase A3)                                                                                                                                                                                                             | 3580  | 1970  | 0.55 | Down | 3270  | 0.91 | -    | 1.66 | Up   |
| Q6PDM2     | SRSF1      | Serine/arginine-rich splicing factor 1 (ASF/SF2) (Pre-mRNA-splicing factor SRp30a) (Splicing factor, arginine/serine-rich 1)                                                                                                                                                          | 1340  | 2070  | 1.54 | Up   | 2170  | 1.62 | Up   | 1.05 | -    |
| Q8BP67     | RL24       | 60S ribosomal protein L24                                                                                                                                                                                                                                                             | 2270  | 3600  | 1.59 | Up   | 5080  | 2.24 | Up   | 1.41 | -    |
| E9PV66     | E9PV66     | Myosin XVIIIb                                                                                                                                                                                                                                                                         | 862   | 794   | 0.92 | -    | 530   | 0.62 | Down | 0.67 | Down |

|        |       |                                                                                                                                                                                                              |       |      |      |      |      |      |      |      |      |
|--------|-------|--------------------------------------------------------------------------------------------------------------------------------------------------------------------------------------------------------------|-------|------|------|------|------|------|------|------|------|
| Q8R1V4 | TMED4 | Transmembrane emp24 domain-containing protein 4 (Endoplasmic reticulum stress-response protein 25) (ERS25) (p24 family protein alpha-3) (p24alpha3) (p26)                                                    | 4760  | 5790 | 1.22 | -    | 9210 | 1.93 | Up   | 1.59 | Up   |
| Q9EQI8 | RM46  | 39S ribosomal protein L46, mitochondrial (L46mt) (MRP-L46)                                                                                                                                                   | 1980  | 2330 | 1.18 | -    | 1470 | 0.74 | -    | 0.63 | Down |
| O09044 | SNP23 | Synaptosomal-associated protein 23 (SNAP-23) (Syndet) (Vesicle-membrane fusion protein SNAP-23)                                                                                                              | 2380  | 4160 | 1.75 | Up   | 3990 | 1.68 | Up   | 0.96 | -    |
| Q9JIQ3 | DBLOH | Diablo homolog, mitochondrial (Direct IAP-binding protein with low pI) (Second mitochondria-derived activator of caspase) (Smac)                                                                             | 526   | 611  | 1.16 | -    | 1300 | 2.47 | Up   | 2.13 | Up   |
| Q9CQJ8 | NDUB9 | NADH dehydrogenase [ubiquinone] 1 beta subcomplex subunit 9 (Complex I-B22) (CI-B22) (NADH-ubiquinone oxidoreductase B22 subunit)                                                                            | 1150  | 730  | 0.63 | Down | 685  | 0.60 | Down | 0.94 | -    |
| Q8CCK0 | H2AW  | Core histone macro-H2A.2 (Histone macroH2A2) (mH2A2)                                                                                                                                                         | 333   | 617  | 1.85 | Up   | 714  | 2.15 | Up   | 1.16 | -    |
| Q8R086 | SUOX  | Sulfite oxidase, mitochondrial (EC 1.8.3.1)                                                                                                                                                                  | 3080  | 1730 | 0.56 | Down | 1890 | 0.61 | Down | 1.09 | -    |
| P63044 | VAMP2 | Vesicle-associated membrane protein 2 (VAMP-2) (Synaptobrevin-2)                                                                                                                                             | 3800  | 7220 | 1.90 | Up   | 8590 | 2.26 | Up   | 1.19 | -    |
| Q60994 | ADIPO | Adiponectin (30 kDa adipocyte complement-related protein) (Adipocyte complement-related 30 kDa protein) (ACRP30) (Adipocyte, C1q and collagen domain-containing protein) (Adipocyte-specific protein AdipoQ) | 5270  | 5920 | 1.12 | -    | 9690 | 1.84 | Up   | 1.64 | Up   |
| Q9D0S9 | HINT2 | Histidine triad nucleotide-binding protein 2, mitochondrial (HINT-2) (EC 3.-.-) (HINT-3)                                                                                                                     | 11700 | 5770 | 0.49 | Down | 5740 | 0.49 | Down | 0.99 | -    |
| Q9D6K8 | FUND2 | FUN14 domain-containing protein 2 (Hepatitis C virus core-binding protein 6)                                                                                                                                 | 4810  | 3230 | 0.67 | -    | 5050 | 1.05 | -    | 1.56 | Up   |
| Q9D5T0 | ATAD1 | ATPase family AAA domain-containing protein 1 (EC 3.6.1.3) (Thorase)                                                                                                                                         | 1160  | 1310 | 1.13 | -    | 867  | 0.75 | -    | 0.66 | Down |

|        |        |                                                                                                                                                                                    |      |      |      |      |      |      |      |      |    |
|--------|--------|------------------------------------------------------------------------------------------------------------------------------------------------------------------------------------|------|------|------|------|------|------|------|------|----|
| Q6ZQI3 | MLEC   | Malectin                                                                                                                                                                           | 2820 | 3350 | 1.19 | -    | 4340 | 1.54 | Up   | 1.30 | -  |
| P14847 | CRP    | C-reactive protein                                                                                                                                                                 | 1620 | 1770 | 1.09 | -    | 4170 | 2.57 | Up   | 2.36 | Up |
| D3YZE7 | D3YZE7 | Erythroid differentiation-related factor 1 (RIKEN cDNA 2700050L05, isoform CRA_b)                                                                                                  | 1280 | 1180 | 0.92 | -    | 2290 | 1.79 | Up   | 1.94 | Up |
| P97855 | G3BP1  | Ras GTPase-activating protein-binding protein 1 (G3BP-1) (EC 3.6.4.12) (EC 3.6.4.13) (ATP-dependent DNA helicase VIII) (GAP SH3 domain-binding protein 1) (HDH-VIII)               | 6130 | 4150 | 0.68 | -    | 3710 | 0.61 | Down | 0.89 | -  |
| F7B5B5 | F7B5B5 | Heterogeneous nuclear ribonucleoprotein R                                                                                                                                          | 1830 | 2960 | 1.62 | Up   | 2990 | 1.63 | Up   | 1.01 | -  |
| Q3UUI3 | THEM4  | Acyl-coenzyme A thioesterase THEM4 (Acyl-CoA thioesterase THEM4) (EC 3.1.2.2) (Carboxyl-terminal modulator protein) (Thioesterase superfamily member 4)                            | 1950 | 1580 | 0.81 | -    | 2450 | 1.26 | -    | 1.55 | Up |
| G3XA17 | G3XA17 | Eukaryotic translation initiation factor 4 gamma 2 (Eukaryotic translation initiation factor 4, gamma 2, isoform CRA_e)                                                            | 1200 | 969  | 0.81 | -    | 800  | 0.67 | Down | 0.82 | -  |
| P62996 | TRA2B  | Transformer-2 protein homolog beta (TRA-2 beta) (TRA2-beta) (Silica-induced gene 41 protein) (SIG-41) (Splicing factor, arginine/serine-rich 10) (Transformer-2 protein homolog B) | 1100 | 1660 | 1.51 | Up   | 3200 | 2.91 | Up   | 1.93 | Up |
| P46471 | PRS7   | 26S proteasome regulatory subunit 7 (26S proteasome AAA-ATPase subunit RPT1) (Proteasome 26S subunit ATPase 2) (Protein MSS1)                                                      | 4470 | 1520 | 0.34 | Down | 1050 | 0.23 | Down | 0.69 | -  |
| Q9Z2Z6 | MCAT   | Mitochondrial carnitine/acylcarnitine carrier protein (Carnitine/acylcarnitine translocase) (CAC) (mCAC) (Solute carrier family 25 member 20)                                      | 3770 | 1810 | 0.48 | Down | 2260 | 0.60 | Down | 1.25 | -  |
| Q00915 | RET1   | Retinol-binding protein 1 (Cellular retinol-binding protein) (CRBP) (Cellular retinol-binding protein I) (CRBP-I) (mCRBPI)                                                         | 1520 | 1900 | 1.25 | -    | 2350 | 1.55 | Up   | 1.24 | -  |
| A0A087 | A0A087 | Eukaryotic translation elongation factor 1 beta 2                                                                                                                                  | 3720 | 1560 | 0.42 | Down | 1490 | 0.40 | Down | 0.96 | -  |

|                |                |                                                                                                                                                                                                |      |      |      |    |      |      |    |      |      |
|----------------|----------------|------------------------------------------------------------------------------------------------------------------------------------------------------------------------------------------------|------|------|------|----|------|------|----|------|------|
| WS46           | WS46           |                                                                                                                                                                                                |      |      |      |    |      |      |    |      |      |
| P35282         | RAB21          | Ras-related protein Rab-21 (Rab-12)                                                                                                                                                            | 1980 | 1830 | 0.92 | -  | 2790 | 1.41 | -  | 1.52 | Up   |
| Q9DC77         | SMPX           | Small muscular protein (Stretch-responsive skeletal muscle protein) (Chisel protein)                                                                                                           | 494  | 610  | 1.23 | -  | 795  | 1.61 | Up | 1.30 | -    |
| Q9D6V8         | PAIP2          | Polyadenylate-binding protein-interacting protein 2 (PABP-interacting protein 2) (PAIP-2) (Poly(A)-binding protein-interacting protein 2)                                                      | 707  | 1330 | 1.88 | Up | 737  | 1.04 | -  | 0.55 | Down |
| G3UWC2         | G3UWC2         | N-acetylated alpha-linked acidic dipeptidase 2, isoform CRA_a (N-acetylated-alpha-linked acidic dipeptidase 2)                                                                                 | 1110 | 1900 | 1.71 | Up | 1980 | 1.78 | Up | 1.04 | -    |
| O35465         | FKBP8          | Peptidyl-prolyl cis-trans isomerase FKBP8 (PPIase FKBP8) (EC 5.2.1.8) (38 kDa FK506-binding protein) (38 kDa FKBP) (FKBP-38) (mFKBP38) (FK506-binding protein 8) (FKBP-8) (FKBPR38) (Rotamase) | 459  | 1040 | 2.27 | Up | 722  | 1.57 | Up | 0.69 | -    |
| P01921         | HB2D           | H-2 class II histocompatibility antigen, A-D beta chain                                                                                                                                        | 397  | 337  | 0.85 | -  | 815  | 2.05 | Up | 2.42 | Up   |
| A0A1L1S<br>UR7 | A0A1L1S<br>UR7 | Phosphatidylinositol-binding clathrin assembly protein (Fragment)                                                                                                                              | 1380 | 2690 | 1.95 | Up | 2440 | 1.77 | Up | 0.91 | -    |
| A0A0A0<br>MQN8 | A0A0A0<br>MQN8 | Neuroplastin                                                                                                                                                                                   | 1600 | 2210 | 1.38 | -  | 2470 | 1.54 | Up | 1.12 | -    |
| P47911         | RL6            | 60S ribosomal protein L6 (TAX-responsive enhancer element-binding protein 107) (TAXREB107)                                                                                                     | 2480 | 3830 | 1.54 | Up | 5610 | 2.26 | Up | 1.46 | -    |
| O70591         | PFD2           | Prefoldin subunit 2                                                                                                                                                                            | 1500 | 2920 | 1.95 | Up | 2430 | 1.62 | Up | 0.83 | -    |
| P61924         | COPZ1          | Coatomer subunit zeta-1 (Zeta-1-coat protein) (Zeta-1 COP)                                                                                                                                     | 2080 | 2900 | 1.39 | -  | 3920 | 1.88 | Up | 1.35 | -    |
| P56393         | COX7B          | Cytochrome c oxidase subunit 7B, mitochondrial (Cytochrome c oxidase polypeptide VIIb)                                                                                                         | 1120 | 965  | 0.86 | -  | 3500 | 3.13 | Up | 3.63 | Up   |
| P50637         | TSPO           | Translocator protein (Mitochondrial benzodiazepine receptor) (PKBS) (Peripheral-type benzodiazepine receptor) (PBR)                                                                            | 1090 | 960  | 0.88 | -  | 1640 | 1.50 | Up | 1.71 | Up   |
| P62900         | RL31           | 60S ribosomal protein L31                                                                                                                                                                      | 623  | 879  | 1.41 | -  | 1080 | 1.73 | Up | 1.23 | -    |

|        |        |                                                                                                                                                                                             |      |      |      |      |      |      |      |      |    |
|--------|--------|---------------------------------------------------------------------------------------------------------------------------------------------------------------------------------------------|------|------|------|------|------|------|------|------|----|
| P35550 | FBRL   | rRNA 2'-O-methyltransferase fibrillarin (EC 2.1.1.-)<br>(Histone-glutamine methyltransferase) (Nucleolar protein 1)                                                                         | 1410 | 525  | 0.37 | Down | 584  | 0.41 | Down | 1.11 | -  |
| P14142 | GLUT4  | Solute carrier family 2, facilitated glucose transporter member 4 (GT2) (Glucose transporter type 4, insulin-responsive) (GLUT-4)                                                           | 541  | 563  | 1.04 | -    | 1070 | 1.98 | Up   | 1.90 | Up |
| Q7TQD2 | TPPP   | Tubulin polymerization-promoting protein (TPPP)                                                                                                                                             | 1420 | 919  | 0.65 | Down | 910  | 0.64 | Down | 0.99 | -  |
| Q91YE8 | SYNP2  | Synaptopodin-2 (Myopodin)                                                                                                                                                                   | 797  | 1030 | 1.29 | -    | 1390 | 1.74 | Up   | 1.35 | -  |
| Q8K4F5 | ABHDB  | Protein ABHD11 (EC 3.-.-.-) (Alpha/beta hydrolase domain-containing protein 11) (Abhydrolase domain-containing protein 11) (Williams-Beuren syndrome chromosomal region 21 protein homolog) | 2060 | 932  | 0.45 | Down | 826  | 0.40 | Down | 0.89 | -  |
| Q9CXU4 | Q9CXU4 | Mitochondrial import inner membrane translocase subunit TIM23                                                                                                                               | 1090 | 2090 | 1.92 | Up   | 2550 | 2.34 | Up   | 1.22 | -  |

---
